1 **Glacier-fed stream biofilms harbour diverse**  
2 **resistomes and biosynthetic gene clusters**

3  
4 Susheel Bhanu Busi<sup>1,#,\*</sup>, Laura de Nies<sup>1,#</sup>, Paraskevi Pramateftaki<sup>2</sup>, Massimo Bourquin<sup>2</sup>,  
5 Leïla Ezzat<sup>2</sup>, Tyler J. Kohler<sup>2</sup>, Stilianos Fodelianakis<sup>2</sup>, Grégoire Michoud<sup>2</sup>, Hannes Peter<sup>2</sup>,  
6 Michail Styllas<sup>2</sup>, Matteo Tolosano<sup>2</sup>, Vincent De Staercke<sup>2</sup>, Martina Schön<sup>2</sup>, Valentina  
7 Galata<sup>1</sup>, Tom Battin<sup>2,\*</sup> and Paul Wilmes<sup>1,\*</sup>

8  
9 <sup>1</sup>Systems Ecology Group, Luxembourg Centre for Systems Biomedicine, University of  
10 Luxembourg, Esch-sur-Alzette, Luxembourg

11 <sup>2</sup>Stream Biofilm & Ecosystem Research Lab, ENAC, Ecole Polytechnique Fédérale de  
12 Lausanne, Lausanne, Switzerland

13  
14 #Contributed equally to this work

15  
16 \*Corresponding author(s):

17 Prof. Paul Wilmes (paul.wilmes@uni.lu)  
18 Susheel Bhanu Busi (susheel.busi@uni.lu)

19  
20 *Running title: Resistome and biosynthetic gene clusters of glacier-fed streams*

21

## 22 **Abstract**

23 **Background:** Antimicrobial resistance (AMR) is a universal phenomenon whose origins  
24 lay in natural ecological interactions such as competition within niches, within and  
25 between micro- to higher-order organisms. However, the ecological and evolutionary  
26 processes shaping AMR need to be better understood in view of better antimicrobial  
27 stewardship. Resolving antibiotic biosynthetic pathways, including biosynthetic gene  
28 clusters (BGCs), and corresponding antimicrobial resistance genes (ARGs) may  
29 therefore help in understanding the inherent mechanisms. However, to study these  
30 phenomena, it is crucial to examine the origins of AMR in pristine environments with  
31 limited anthropogenic influences. In this context, epilithic biofilms residing in glacier-fed  
32 streams (GFSs) are an excellent model system to study diverse, intra- and inter-domain,  
33 ecological crosstalk.

34 **Results:** We assessed the resistomes of epilithic biofilms from GFSs across the Southern  
35 Alps (New Zealand) and the Caucasus (Russia) and observed that both bacteria and  
36 eukaryotes encoded twenty-nine distinct AMR categories. Of these, beta-lactam,  
37 aminoglycoside, and multidrug resistance were both abundant and taxonomically  
38 distributed in most of the bacterial and eukaryotic phyla. AMR-encoding phyla included  
39 Bacteroidota and Proteobacteria among the bacteria, alongside Ochrophyta (algae)  
40 among the eukaryotes. Additionally, BGCs involved in the production of antibacterial  
41 compounds were identified across all phyla in the epilithic biofilms. Furthermore, we found  
42 that several bacterial genera (*Flavobacterium*, *Polaromonas*, etc.) including  
43 representatives of the superphylum Patescibacteria encode both ARGs and BGCs within  
44 close proximity of each other, thereby demonstrating their capacity to simultaneously  
45 influence and compete within the microbial community.

46 **Conclusions:** Our findings highlight the presence and abundance of AMR in epilithic  
47 biofilms within GFSs. Additionally, we identify their role in the complex intra- and inter-  
48 domain competition and the underlying mechanisms influencing microbial survival in GFS  
49 epilithic biofilms. We demonstrate that eukaryotes may serve as AMR reservoirs owing  
50 to their potential for encoding ARGs. We also find that the taxonomic affiliation of the AMR  
51 and the BGCs are congruent. Importantly, our findings allow for understanding how  
52 naturally occurring BGCs and AMR contribute to the epilithic biofilms mode of life in GFSs.  
53 Importantly, these observations may be generalizable and potentially extended to other  
54 environments which may be more or less impacted by human activity.

55

## 56 **Introduction**

57 Today, antimicrobial resistance (AMR) has become a well-known threat to human health  
58 with an estimated number of 700,000 people per year dying of drug-resistant infections  
59 [1]. The dramatic rise of antimicrobial resistance over the past decade has even led to the  
60 moniker, “silent pandemic” [2]. Therefore, AMR is often directly associated with human  
61 impacted environments with a global increase in resistant bacteria linked to the over- and  
62 mis-use of antibiotics [3]. However, contrary to public perception, AMR is a natural  
63 phenomenon, which has existed for billions of years [4]. Long before the rather recent  
64 use of antibiotics in the clinical setting, microorganisms have used these, along with  
65 corresponding protective mechanisms, to establish competitive advantages over other  
66 microbes contending for the same environment and/or resources [5].

67

68 Microbes, in general, produce a range of secondary metabolites with diverse chemical  
69 structures which in turn confer a variety of functions, including antibiotics [6]. Such  
70 secondary metabolites including metal transporters and quorum sensing molecules [7,8]  
71 are not directly associated with the growth of microorganisms themselves but instead are  
72 known to provide benefits by acting as growth inhibitors against competing bacteria.  
73 Consequently, many of these natural products have found their uses in industrial settings  
74 as well as in human medicine as anti-infective drugs [7,9,10]. The biosynthetic pathways  
75 responsible for producing these specialized metabolites are encoded by locally clustered  
76 groups of genes known as ‘biosynthetic gene clusters’ (BGCs). Typically, BGCs include  
77 genes for expression control, self-resistance, and metabolite export [11]. They can,  
78 however, be further divided into various classes including non-ribosomal peptide  
79 synthetases (NRPSs), type I and type II polyketide synthases (PKSs), terpenes, and

80 bacteriocins alongside others [10]. NRPSs and PKSs specifically have been of interest  
81 due to their known synthesis of putative antibiotics [12,13]. Furthermore, evidence  
82 suggests that within these BGCs at least one resistance gene conferring resistance can  
83 be found as a self-defense mechanism against the potentially harmful secondary  
84 metabolites encoded by the BGC [14]. For instance, the tylosin-biosynthetic gene cluster  
85 of *Streptomyces fradiae* also encodes three resistance genes (*tlrB*, *tlrC* and *tlrD*) [15],  
86 while in another example, *Streptomyces toyacaensis*, the *vanHAX* resistance cassette is  
87 proximal to the vancomycin biosynthesis gene cluster, thereby encoding inherent  
88 resistance [16].

89

90 Remote and pristine microbial communities provide a rich genetic resource to explore the  
91 historical evolutionary origins of naturally occurring antibiotic resistance from the pre-  
92 antibiotic era. Only in few pristine environments with limited anthropogenic influence (e.g.,  
93 permafrost, glaciers, deep sea, and polar regions) can remnants of the above-described  
94 ancient biological warfare mechanisms still be detected. These ARGs and resistant  
95 bacteria evolving in pristine environments may therefore be considered the inherent  
96 antibiotic resistance present in the environment [5].

97

98 We have recently reported the genomic and metabolic adaptations of epilithic biofilms to  
99 windows of opportunities in glacier-fed streams (GFSs) [17]. For example, given the short  
100 flow season during glacial melt, i.e. summer, the incentive to reproduce quickly while  
101 conditions are favourable, is high. During these windows of opportunity, the necessity for  
102 taxa to not only acquire physical niches, but also appropriate resources yields a  
103 competitive environment. Within these biofilms, we observe complex cross-domain

104 interactions between microorganisms to potentially mitigate the harsh nutrient and  
105 environmental conditions of the GFSs. Additionally, owing to their complex biodiversity  
106 [18] and generally oligotrophic conditions [19], epilithic biofilms are ideal model systems  
107 for understanding BGCs and AMR. While oligotrophy may provide the basis for  
108 competition over resources amongst microorganisms such as prokaryotes and (micro-  
109 )eukaryotes. Our previous insights revealed that taxa such as *Polaromonas*,  
110 *Acidobacteria*, and *Methylothera* have strong interactions with eukaryotes such as algae  
111 and fungi [17]. The inherent diversity allows for understanding the influence of AMR in  
112 microbial interactions. For example, the accidental discovery of penicillin by Alexander  
113 Fleming in 1928 based on bacterial-fungal interactions, [20], has since been expanded  
114 upon by Netzker *et al.* [21]. They reported that microbial interactions lead to the production  
115 of bioactive compounds including antibiotics that may shape the microbial consortia within  
116 a community.

117  
118 Here, to shed light on the role of AMR in shaping microbial communities within (relatively)  
119 pristine environments, we used high-resolution metagenomics to investigate twenty-one  
120 epilithic biofilms from glacier-fed streams. These samples were collected from 8 GFSs  
121 spread across the Southern Alps in New Zealand and the Caucasus in Russia  
122 (Supplementary Table 1). Herein, we found 29 categories of ARGs within the GFSs  
123 across both bacterial and eukaryotic domains. Importantly, most of the AMR was found  
124 in bacteria. We also identified antibacterial BGCs that were encoded both in bacterial and  
125 eukaryotes suggesting extensive intra- and inter-domain competition. Our findings  
126 demonstrate that microorganisms within biofilms from pristine environments not only  
127 encode ARGs, but that they may potentially influence several features of epilithic biofilms

128 such as biofilm formation, community assembly and/or maintenance, including conferring  
129 mechanisms for competitive advantages under extreme conditions.

130

## 131 **Methods**

### 132 **Sampling and biomolecular extractions**

133 Eight GFSs were sampled in early- to mid-2019 from the New Zealand Southern Alps and  
134 the Russian Caucasus, respectively, for a total of 21 epilithic biofilms (Supp. Table 1).  
135 The biofilm samples were collected from each stream reach due to biofilms ranging from  
136 abundant to absent, depending on stream geomorphology. One to three biofilm samples  
137 were collected per reach (Supp. Table 1), taken using sterilized metal spatulas to scrape  
138 rocks, followed by their immediate transfer to cryovials. Samples were immediately flash-  
139 frozen in liquid nitrogen and stored at -80 °C until DNA was extracted. DNA from the  
140 epilithic biofilms was extracted using a previously established protocol [22] adapted to a  
141 smaller scale due to relatively high DNA concentrations. DNA quantification was  
142 performed for all samples with the Qubit dsDNA HS kit (Invitrogen).

143

### 144 **Sequencing and data processing for metagenomics**

145 Random shotgun sequencing was performed on all epilithic biofilm DNA samples after  
146 library preparation using the NEBNext Ultra II FS library kit. 50 ng of DNA was  
147 enzymatically fragmented for 12.5 min and libraries were prepared with six PCR  
148 amplification cycles. An average insert of 450 bp was maintained for all libraries. Qubit  
149 was used to quantify the libraries followed by sequencing at the Functional Genomics  
150 Centre Zurich on a NovaSeq (Illumina) using a S4 flowcell. The metagenomic data was

151 processed using the Integrated Meta-omic Pipeline (IMP v3.0; commit# 9672c874  
152 available at <https://git-r3lab.uni.lu/IMP/imp3>) [23]. IMP's workflow includes pre-  
153 processing, contig assembly, genome reconstruction (metagenome-assembled  
154 genomes, i.e. MAGs) and additional functional analysis of genes based on custom  
155 databases in a reproducible manner [23].

156

## 157 **Identification of antimicrobial resistance genes, antibiotic biosynthesis** 158 **pathways and BGCs**

159 For the prediction of ARGs the IMP-generated contigs were used as input for PathoFact  
160 [24]. Identified ARGs were further collapsed into their respective AMR categories in  
161 accordance with the Comprehensive Antibiotic Resistance Database (CARD) [25].  
162 PathoFact uses an HMM-based search to identify homologous sequences across  
163 genomic data, therefore possibly also detecting resistance genes within eukaryotic  
164 genomic fragments. Subsequently, the raw read counts per ORF, obtained from  
165 PathoFact, were determined using FeatureCounts [26].

166

167 To identify pathways for the biosynthesis of antibiotics, we assigned KEGG orthology  
168 (KOs) identifiers to the ORFs using a hidden Markov model [27] (HMM) approach using  
169 *hmmsearch* from HMMER 3.1 [28] with a minimum bit score of 40. Additionally, we linked  
170 the identified KOs to their corresponding KEGG orthology pathways and extracted the  
171 pathways annotated as antibiotic biosynthesis pathways by KEGG. Both the identified  
172 ARGs and KEGG pathways were then further linked to associated bacterial taxonomies.  
173 The bacterial and eukaryotic taxonomies were assigned using the PhyloDB and MMETSP  
174 databases associated with EUKulele (commit# fb8726a; available at



175 <https://github.com/AlexanderLabWHOI/EUKulele>). Consensus taxonomy per contig was  
176 then used for downstream analyses including association with ARGs.

177

178 We further identified BGCs within the MAGs using antiSMASH (ANTIbiotics & Secondary  
179 Metabolite Analysis SHell) [29] and annotated these using deepBGC [30]. To link BGCs  
180 and ARGs, we linked the resistance genes to their associated assembled contigs,  
181 followed by identifying the corresponding bins (MAGs) to which said contigs belonged.

182

## 183 **Data analysis**

184 The relative abundance of the ORFs was calculated based on the RNum\_Gi method  
185 described by Hu *et al.* [31]. Figures for the study, including visualizations derived from the  
186 taxonomic and functional analyses, were created using version 3.6 of the R statistical  
187 software package [32] and using the *tidyverse* package [33]. Alluvial plots were  
188 generated using the *ggalluvial* package [34] while heatmaps were generated using the  
189 *ComplexHeatmap* package [35] developed for R. The corresponding visualization and  
190 analysis code is available at: [https://gitr3lab.uni.lu/laura.denies/Rock\\_Biofilm\\_AMR](https://gitr3lab.uni.lu/laura.denies/Rock_Biofilm_AMR).

191

## 192 **Results**

### 193 **Antimicrobial resistance in a pristine environment**

194 We characterised the resistomes of GFS epilithic biofilms and assessed the distribution  
195 of AMR in twenty-one epilithic biofilm samples, across 8 individual glaciers originating  
196 from the Southern Alps in New-Zealand (SA1, SA2, SA3 and SA4) and the Caucasus in

197 Russia (CU1, CU2, CU3, CU4). In total, we identified a high number (n=1840) of ARGs  
198 within 29 categories of AMR, with similar AMR profiles observed across all GFSs (Fig.  
199 1a, Supp. Fig. 1), except for SA2 and SA3 where the differences were driven by elevated  
200 fluoroquinolone, glycopeptide and phenicol resistance, respectively. It is to be noted that  
201 while ARGs refer to the genes encoding specific resistance, AMR categories derived from  
202 metagenomic data in this context, typically reflect the functional potential associated with  
203 respect to the resistance encoded. Of the identified AMR categories, beta-lactam and  
204 multidrug resistance (i.e. resistance conferring protection against multiple antibiotic  
205 classes), followed by aminoglycoside resistance, were found to be highly abundant in all  
206 samples. We subsequently analysed the diversity of ARGs within the various resistance  
207 categories and found beta-lactam resistance to represent the largest resistance category,  
208 contributing 930 unique ARGs to the resistome. This was followed by multidrug (179  
209 ARGs) and aminoglycoside (176 ARGs) resistance (Supp. Table 2). In contrast, some  
210 resistance categories such as polymyxin and pleuromutilin resistance were only detected  
211 at very low levels within the epilithic biofilm resistomes.

212  
213 We further investigated the contribution of microbial populations to the resistome and  
214 found contributions from both prokaryotes and eukaryotes (Fig. 1b). Prokaryotes within  
215 this study refer to bacteria alone, since archaea encoded for an infinitesimal number of  
216 ARGs (<0.000001% RNum\_GI; *Methods*), and therefore were excluded from further  
217 analyses. Among the eukaryotes, the phylum Ochrophyta (algae) was the dominant  
218 contributor and encoded most of the AMR categories (Fig. 1c, Supp. Fig. 2a). In bacteria,  
219 AMR was more evenly distributed with most of the phyla encoding ARGs across all  
220 categories (Fig. 1c). However, members of the Alphaproteobacteria, Betaproteobacteria,

221 and the Bacteroidetes/Chlorobi group encoded the highest overall ARG abundance (Fig.  
222 1c, Supp. Fig. 2b). Additionally, AMR categories such as aminoglycoside, beta-lactam,  
223 glycopeptide and rifamycin resistance (among others) were widely distributed in both  
224 bacteria as well as among the eukaryotes. On the other hand, categories such as  
225 aminocoumarin, bacitracin, and diaminopyrimidine resistance were found to be primarily  
226 encoded by bacteria.

227

## 228 **Antibiotic biosynthesis pathways and biosynthetic gene clusters**

229 As described above, beta-lactam, multidrug and aminoglycoside resistance were the  
230 most abundant resistance categories within GFS epilithic biofilms. This was not surprising  
231 as beta-lactams and aminoglycosides are natural and prevalent compounds [36,37].  
232 Furthermore, multidrug resistance is typically conferred via efflux machineries which were  
233 also common in the GFS epilithic biofilms. These typically serve dual purposes in  
234 particular for protein export within most bacteria [38]. Based on these results, it is  
235 therefore highly likely that pristine environments such as GFSs potentially reflect the  
236 spectrum of natural antibiotics and their resistance mechanisms, reinforcing their capacity  
237 to serve as natural baselines for assessing enrichments and spread of AMR.

238

239 To further understand if these encoded resistance genes reflected natural antibiotic  
240 pressure, we investigated pathways associated with antibiotic biosynthesis using the  
241 KEGG database [39]. In total, we identified seven different pathways corresponding to  
242 the biosynthesis of macrolides (MLS), ansamycins, glycopeptides (vancomycin), beta-  
243 lactams (monobactam, penicillin and cephalosporin), aminoglycosides (streptomycin),

244 and tetracyclines, which were present in various abundances in all samples (Supp. Fig.  
245 3a). Importantly, the identified antibiotic synthesis genes thereby corresponded to the  
246 resistance categories identified within the epilithic biofilms. Interestingly, in most of the  
247 GFSs, antibiotic biosynthesis was primarily encoded by bacteria spanning multiple phyla  
248 (Supp. Fig. 3b, Supp. Fig. 3c). Exceptions to these were GL11 and GL15 in which  
249 biosynthesis pathways were equally distributed among eukaryotes, specifically  
250 Ochrophyta, in addition to bacteria.

251  
252 To further validate our observations, we assessed the abundance of BGCs, which are  
253 known to encode genes for secondary metabolite synthesis, including antibiotics. We  
254 found six different structural classes of BGCs by annotating 537 medium-to-high quality  
255 (>50% completion and <10% contamination) bacterial and 30 eukaryotic MAGs using  
256 antiSmash [29] and DeepBGC [30]. Using this ensemble approach we identified one or  
257 more BGCs in most bacterial (n=490, ~91% of all bacterial MAGs) and eukaryotic (n=28)  
258 MAGs. Of these BGCs, those annotated with an antibacterial function were dominant  
259 across the microbial populations, represented here by the MAGs, and were found across  
260 all phyla (Fig. 2a). Overall, a wider variety of BGCs associated with cytotoxic activity,  
261 inhibitory, and antifungal mechanisms were also identified in bacteria. Eukaryotes, on the  
262 other hand, encoded a high prevalence of antibacterial BGCs (~93% of all eukaryotic  
263 MAGs) (Fig. 2a). We further annotated those BGCs identified as antibacterial to  
264 determine their subtypes and found that most of them were 'unknown' (Fig. 2b). However,  
265 other identified subtypes include ribosomally synthesized and post-translationally  
266 modified peptides (RiPPs) such as bacteriocins, along with NRPs, PKs, and terpenes.

267

268 According to the resistance hypothesis [14], within or close to, each BGC there is at least  
269 one gene conferring resistance to its encoded secondary metabolite. To test this, we  
270 assessed whether the MAGs encoding a BGC also encoded corresponding ARGs. In line  
271 with this hypothesis, we identified BGCs and their respective resistance genes in close  
272 proximity to each other through their localization on the same contig. Consequently, we  
273 identified various BGCs encoded together with ARGs in both the bacterial and eukaryotic  
274 MAGs. For example, we found that an antibacterial BGC was encoded by *Flavobacterium*  
275 spp. on the same contig as both MLS (macrolides, lincosamides and streptogramin) and  
276 beta-lactam resistance genes (Fig. 2c). Incidentally, we also found that a candidate phyla  
277 radiation (CPR) bacterium (Aalborg-AAW-1; phylum Patescibacteria) also encoded both  
278 antibacterial BGC and MLS resistance on the same contig.

279

## 280 Discussion

281 Microbial reservoirs in pristine environments, with little to no impact from anthropogenic  
282 selection pressures, provide the opportunity to investigate the natural propensity and  
283 linked evolutionary origins of AMR. Here, by leveraging high-resolution metagenomics on  
284 twenty-one epilithic biofilms, we assessed the resistomes of eight individual GFS epilithic  
285 biofilms.

286

287 To date, while many studies have looked for novel antibiotics and resistance genes in  
288 pristine environments such as the deep sea [40] or the polar regions [41], few have  
289 explored the full diversity of antibiotic resistance in such environments [42,43]. Van  
290 Goethem *et al.* [44] identified 117 naturally occurring ARGs associated with multidrug,

291 aminoglycoside and beta-lactam resistance in pristine Antarctic soils. Similarly, D'Costa  
292 *et al.* [4] identified a collection of ARGs encoding resistance to beta-lactams as well as  
293 tetracyclines and glycopeptides in 30,000-year-old Beringian permafrost sediments. In  
294 agreement with these previous studies, we identified 29 AMR categories, including the  
295 previously mentioned resistance categories, in the studied biofilm communities. Among  
296 these, the highest ARG abundance was associated with aminoglycoside and beta-lactam  
297 resistance. Our study further suggests that although the overall abundance differs, the  
298 epilithic resistome was highly similar in all GFSs, independent of origin (i.e. New Zealand  
299 or Russia). Furthermore, our results agree with the results obtained in other resistomes  
300 identified in pristine environments such as Antarctic soils and permafrost in terms of the  
301 identified ARGs. Unlike previous studies, where ARGs were primarily associated with  
302 bacteria, we report for the first time that AMR was associated with both bacteria and  
303 eukaryotes in various abundances in environmental samples including GFSs. A previous  
304 study by Brown *et al.* [45] reported that the IRS-HR (isoleucyl-tRNA synthetase - high  
305 resistance) type gene conferring resistance against mupirocin was identified in  
306 *Staphylococcus aureus*. More importantly, they suggested that horizontal gene transfer  
307 led to the acquisition of IRS-HR genes by bacteria from eukaryotes [45]. Despite these  
308 early reports, the contribution of eukaryotes to most resistomes, including from pristine  
309 environments, has largely been unexplored thus far. An exception to this was the report  
310 by Fairlamb *et al.* [46] who identified eukaryotic drug resistance, especially encoded by  
311 fungi (*Candida* and *Aspergillus*) and parasites (*Plasmodium* and *Trypanosoma*).  
312 However, most of these modes of resistance were highly specific towards particular drug  
313 treatments [46]. Our results specifically revealed that taxa from the phylum Ochrophyta

314 encoded resistance to 28 AMR categories and this was also reflected in other (micro-  
315 )eukaryotes.

316

317 Apart from encoded resistance mechanisms, microalgae such as Ochrophyta have been  
318 of interest as a source of (new) antimicrobial compounds [47,48]. In line with this, Martins  
319 *et al.* suggested that extracts from different microalgae may potentially serve not only as  
320 antimicrobial agents, but also as anti-cancer therapeutics. However, our present results  
321 suggest that these taxa may also serve as environmental reservoirs for AMR itself. It is  
322 however presently unclear whether this phenomenon confers advantages with respect to  
323 niche occupation and protection against bacterial infection as well as whether the  
324 eukaryotes are sensitive to the antibiotics produced by them.

325

326 Studies delving into the origins of AMR have reported that fecal pollution may explain  
327 ARG abundances in anthropogenically impacted environments [49]. This phenomenon  
328 was also observed by Antelo *et al.* [50] and others [51] who detected ARGs in soils in  
329 Antarctica, especially in proximity to scientific bases. Although it is plausible that some of  
330 the GFSs sampled in our study may indeed be under anthropogenic influence, in pristine  
331 environments, AMR is most likely derived from natural antibiotics produced by  
332 microorganisms as a competitive advantage. Microorganisms acquire resistance either  
333 as a protective measure against other microorganisms [52,53] or as a self-defense  
334 mechanism to prevent inadvertent suicide by damaging metabolites [14]. Accordingly, we  
335 found both antibiotic biosynthesis pathways and BGCs within the epilithic resistomes. We  
336 identified pathways for the biosynthesis of glycopeptides, beta-lactams, and  
337 aminoglycosides, among others, concurrent with the high abundance of ARGs against

338 said antibiotics. Additionally, we identified BGCs with a predicted antibacterial function in  
339 both eukaryotes and bacteria. While a limited number of studies such as Waschulin *et al.*  
340 [54] and Liao *et al.* [55], have shown BGCs in pristine environments, none of these studies  
341 have contextualized the co-occurrence of BGCs with AMR. Hence, we not only found that  
342 most of our MAGs contain BGCs, of which many have an antibacterial function, but also  
343 found all MAGs to encode multiple resistance genes. Additionally, we found several BGCs  
344 closely localized to ARGs on the same contig, thereby indicating an immediate self-  
345 defense mechanism against the encoded secondary metabolites. This agrees with the  
346 resistance hypothesis highlighted by Tran *et al.* stating that a gene conferring resistance  
347 to potentially harmful metabolites produced by the organism are to be found within the  
348 BGC-encoding operons [14]. We also observed that the recently identified CPR bacteria  
349 [56] (in our case, phylum Patescibacteria) not only encoded for AMR but also harboured  
350 genes associated with the production of molecules with antibacterial effects. Although  
351 Patescibacteria have been identified in oligotrophic environments [57,58] with carbon  
352 and/or nutrient limitations similar to those observed for GFSs, it is plausible that their  
353 ability to survive with minimal biosynthetic and metabolic pathways may indeed depend  
354 on the expression of BGCs and AMR. At the time of writing, a preprint by Maatouk *et al.*  
355 [59], described the presence of ARGs across publicly available CPR bacterial genomes.  
356 In addition, we report the identification of AMR within GFS-derived CPR genomes, likely  
357 as a means of competitive inhibition against other taxa. Alternatively, biofilms may also  
358 allow for collective resistance, tolerance, and exposure protection to antibacterial  
359 compounds [60]. The AMR and BGCs encoded by most phyla may therefore affect  
360 cooperation and/or interactions associated with nutrient exchange, leading to the  
361 privatization of public goods [60]. Such a phenomenon may be achieved due to the



362 competition within taxa, both at the intra- and inter-species levels, via secretion of toxins  
363 [53] and occupying spatial niches [61,62] thereafter. Furthermore, Stubbendieck and  
364 Straight previously highlighted the multifaceted effects of bacterial competition which  
365 include the potential taxation and subsequent increase in bacterial fitness [63]. Thus, the  
366 *in-situ* competition within multi-species biofilms may allow for cross-phyla and cross-  
367 domain interactions whilst simultaneously increasing the overall fitness of the  
368 endogenous epilithic microbial community. Alternatively, these interactions or lack thereof  
369 may shape the overall community including spatial organisation [64], especially in energy  
370 limited systems such as the GFSs.

371

## 372 **Conclusions**

373 Epilithic biofilms are an integral and key mode of survival in extreme environments such  
374 as glacier-fed stream ecosystems. Herein, we report that these biofilms provide critical  
375 insights into the naturally occurring resistome. Our findings demonstrate that intra- and  
376 inter-domain competition and survival mechanisms shed light on the ecological dimension  
377 of microbial communities. Furthermore, we reveal the congruence of genes encoding for  
378 both BGCs and AMR, in both bacteria and eukaryotes. More importantly, we highlight for  
379 the first time the comprehensive AMR profile of CPR bacteria and of (micro-)eukaryotes.  
380 Collectively, our results highlight underlying resistance mechanisms, including BGCs,  
381 employed in 'biological warfare' in oligotrophic and challenging glacier-fed stream  
382 ecosystems.

383

## 384 **List of Abbreviations**

- 385 AMR: Antimicrobial resistance
- 386 ARGs: Antimicrobial resistance gene(s)
- 387 BGC: Biosynthetic gene clusters
- 388 CA: Caucasus
- 389 CPR: Candidate Phyla radiation
- 390 GFSs: Glacier-fed stream(s)
- 391 GL: Glacier
- 392 IRS-RS: isoleucyl-tRNA synthetase - high resistance
- 393 IMP: Integrate Meta-Omics Pipeline
- 394 KEGG: Kyoto Encyclopedia of Genes and Genomes
- 395 MAGs: Metagenome-assembled genome(s)
- 396 NRPS: Non-ribosomal peptide synthetases
- 397 PKS: Polyketide synthases (type I and type II)
- 398 RiPPs: Post-translationally modified peptide(s)
- 399 SA: Southern Alps
- 400

## 401 **Declarations**

- 402 Ethics approval and consent to participate
- 403 Not applicable
- 404 Consent for publication
- 405 Not applicable

## 406 **Availability of data and material**

407 The Biosample accession IDs listed under Supp. Table 3 can be found on NCBI under  
408 the BioProject accession# **PRJNA733707**. The analyses code for IMP and downstream  
409 analyses is detailed at [https://git-r3lab.uni.lu/susheel.busi/nomis\\_pipeline](https://git-r3lab.uni.lu/susheel.busi/nomis_pipeline). Binning and  
410 manual refinement of eukaryotic MAGs was done as described here: [https://git-](https://git-r3lab.uni.lu/susheel.busi/nomis_pipeline/-/blob/master/workflow/notes/MiscEUKMAGs.md)  
411 [r3lab.uni.lu/susheel.busi/nomis\\_pipeline/-](https://git-r3lab.uni.lu/susheel.busi/nomis_pipeline/-/blob/master/workflow/notes/MiscEUKMAGs.md)  
412 [/blob/master/workflow/notes/MiscEUKMAGs.md](https://git-r3lab.uni.lu/susheel.busi/nomis_pipeline/-/blob/master/workflow/notes/MiscEUKMAGs.md). All visualization and analysis code is  
413 available at: [https://git-r3lab.uni.lu/laura.denies/Rock\\_Biofilm\\_AMR](https://git-r3lab.uni.lu/laura.denies/Rock_Biofilm_AMR).

## 414 **Competing interests**

415 The authors declare that they have no competing interests

## 416 **Funding**

417 This research has been supported by The NOMIS Foundation to TJB and the Swiss  
418 National Science Foundation (CRSII5\_180241) supporting SBB. LdN and PW are  
419 supported by the Luxembourg National Research Fund (FNR; PRIDE17/11823097)  
420 awarded to PW.

## 421 **Authors' contributions**

422 SBB, LdN, PW, and TJB conceived the project. PP extracted DNA, SBB and PP prepared  
423 the metagenomic libraries for sequencing. SBB and LdN conceptualized and performed  
424 the data analyses. SBB and LdN wrote the manuscript with PW and TJB, with significant  
425 input and editing from all coauthors.

## 426 **Acknowledgements**

427 We gratefully acknowledge the laboratory support from Emmy Marie Oppliger at EPFL  
428 and Lea Grandmougin, Janine Habier, Laura Lebrun at the University of Luxembourg.  
429 We also acknowledge the key input from Rashi Halder at the LCSB Sequencing Platform  
430 regarding library preparation. We thank Patrick May and Cedric Christian Laczny for the  
431 crucial insights into metagenomic processing. The computational analyses were  
432 performed at the HPC facilities at the University of Luxembourg (<https://hpc.uni.lu>) [65].

433

## 434 **Figure legends**

### 435 **Figure 1. Epilithic biofilms in GFSs harbour a diverse resistome**

436 (a) Relative abundance of 29 AMR categories within 21 epilithic biofilms collected from  
437 four New Zealand Southern Alps (SA) and four Russian Caucasus (CU) GFSs. (b) Bar  
438 plots depicting the relative abundance of bacteria and eukaryotes encoding ARGs. (c)  
439 Phylum-level representation of the AMR abundances across bacteria and eukaryotes.  
440 Size of the closed circle indicates the normalised relative abundance (Rnum\_Gi; see  
441 *Methods*), whereby the color represents individual phyla.

442

### 443 **Figure 2. Biosynthetic gene clusters indicate the resistome potential**

444 (a) Heatmap depicting the overall abundance of BGCs identified across bacterial and  
445 eukaryotic MAGs. The respective phyla are listed on the left while the coloured legend  
446 represents the taxonomic order. (b) In-depth characterisation of the 'antibacterial' BGCs  
447 found within all phyla and orders across medium-to-high quality MAGs. (c) Alluvial plots

448 depicting the taxa where both BGCs and AMR were found adjacently on the same contig.  
449 Colours indicate the genera associated with the MAGs.

450

451 **Supplementary figure 1. Ordination analyses reveal the (dis)similarity of the GFS**  
452 **resistomes**

453 (a) Principal component analyses depicting the overall similarity of the individual GFS  
454 resistomes. Each dot represents the resistome predicted from a single metagenome. SA:  
455 Southern Alps. CU: Caucasus. (b) Biplot demonstrating the underlying factors, i.e. ARG  
456 abundances across 29 AMR categories, driving the similarity within the GFS epilithic  
457 resistomes.

458

459 **Supplementary figure 2. Bacterial and eukaryotic phyla encode AMR**

460 (a) Relative abundance of the bacteria associated with AMR. The stacked bar plots are  
461 faceted by the individual GFSs where the epilithic biofilms were collected. The colors  
462 represent the individual phyla. (b) Stacked bar plots indicating the relative abundance of  
463 the AMR encoded by eukaryotes.

464

465 **Supplementary figure 3. Antibiotic synthesis pathway assessment via KEGG**  
466 **orthology**

467 (a) Relative abundance of KEGG pathways associated with antibiotic synthesis across  
468 the 21 epilithic biofilms. (b) Bar plots indicating the relative abundance of the antibiotic  
469 associated KEGG pathways mediated by bacteria and eukaryotes. (c) Normalised relative  
470 abundance of pathways associated with antibiotic production in the KEGG database,  
471 juxtaposed with the various phyla encoding these genes.

472

## 473 **Supplementary data**

### 474 **Supplementary table 1. Sample metadata**

### 475 **Supplementary table 2. List of ARGs identified across 21 GFS epilithic biofilms**

### 476 **Supplementary table 3. NCBI accession metadata**

477

## 478 **References**

- 479 1. Stanton IC, Bethel A, Leonard AFC, Gaze WH, Garside R. What is the research evidence  
480 for antibiotic resistance exposure and transmission to humans from the environment? A  
481 systematic map protocol. *Environ Evid.* 2020;9: 12.
- 482 2. Balasegaram M. Learning from COVID-19 to Tackle Antibiotic Resistance. *ACS Infect Dis.*  
483 2021;7: 693–694.
- 484 3. Wright GD. The antibiotic resistome: the nexus of chemical and genetic diversity. *Nat Rev*  
485 *Microbiol.* 2007;5: 175–186.
- 486 4. D'Costa VM, King CE, Kalan L, Morar M, Sung WWL, Schwarz C, et al. Antibiotic  
487 resistance is ancient. *Nature.* 2011;477: 457–461.
- 488 5. Scott LC, Lee N, Aw TG. Antibiotic Resistance in Minimally Human-Impacted  
489 Environments. *Int J Environ Res Public Health.* 2020;17. doi:10.3390/ijerph17113939
- 490 6. Tyc O, Song C, Dickschat JS, Vos M, Garbeva P. The Ecological Role of Volatile and  
491 Soluble Secondary Metabolites Produced by Soil Bacteria. *Trends Microbiol.* 2017;25: 280–  
492 292.
- 493 7. Chen R, Wong HL, Kindler GS, MacLeod FI, Benaud N, Ferrari BC, et al. Discovery of an

- 494 Abundance of Biosynthetic Gene Clusters in Shark Bay Microbial Mats. *Front Microbiol.*  
495 2020;11: 1950.
- 496 8. Demain AL, Fang A. The Natural Functions of Secondary Metabolites. In: Fiechter A, editor.  
497 History of Modern Biotechnology I. Berlin, Heidelberg: Springer Berlin Heidelberg; 2000. pp.  
498 1–39.
- 499 9. Newman DJ, Cragg GM. Natural Products as Sources of New Drugs from 1981 to 2014. *J*  
500 *Nat Prod.* 2016;79: 629–661.
- 501 10. Medema MH, Kottmann R, Yilmaz P, Cummings M, Biggins JB, Blin K, et al. Minimum  
502 Information about a Biosynthetic Gene cluster. *Nat Chem Biol.* 2015;11: 625–631.
- 503 11. Martinet L, Naômé A, Deflandre B, Maciejewska M, Tellatin D, Tenconi E, et al. A Single  
504 Biosynthetic Gene Cluster Is Responsible for the Production of Bagremycin Antibiotics and  
505 Ferroverdin Iron Chelators. *MBio.* 2019;10. doi:10.1128/mBio.01230-19
- 506 12. Martínez-Núñez MA, López VEL y. Nonribosomal peptides synthetases and their  
507 applications in industry. *Sustainable Chemical Processes.* 2016;4: 1–8.
- 508 13. Ridley CP, Lee HY, Khosla C. Evolution of polyketide synthases in bacteria. *Proc Natl Acad*  
509 *Sci U S A.* 2008;105: 4595–4600.
- 510 14. Tran PN, Yen M-R, Chiang C-Y, Lin H-C, Chen P-Y. Detecting and prioritizing biosynthetic  
511 gene clusters for bioactive compounds in bacteria and fungi. *Appl Microbiol Biotechnol.*  
512 2019;103: 3277–3287.
- 513 15. Cundliffe E, Bate N, Butler A, Fish S, Gandeche A, Merson-Davies L. The tylosin-  
514 biosynthetic genes of *Streptomyces fradiae*. *Antonie Van Leeuwenhoek.* 2001;79: 229–234.
- 515 16. Kwun MJ, Hong H-J. Genome Sequence of *Streptomyces toyocaensis* NRRL 15009,  
516 Producer of the Glycopeptide Antibiotic A47934. *Genome Announc.* 2014;2.

517 doi:10.1128/genomeA.00749-14

- 518 17. Busi SB, Bourquin M, Fodelianakis S, Michoud G, Kohler TJ, Peter H, et al. Genomic and  
519 metabolic adaptations of biofilms to ecological windows of opportunities in glacier-fed  
520 streams. *bioRxiv*. 2021. p. 2021.10.07.463499. doi:10.1101/2021.10.07.463499
- 521 18. Battin TJ, Besemer K, Bengtsson MM, Romani AM, Packmann AI. The ecology and  
522 biogeochemistry of stream biofilms. *Nat Rev Microbiol*. 2016;14: 251–263.
- 523 19. Battin TJ, Wille A, Sattler B, Psenner R. Phylogenetic and functional heterogeneity of  
524 sediment biofilms along environmental gradients in a glacial stream. *Appl Environ Microbiol*.  
525 2001;67: 799–807.
- 526 20. Gaynes R. The Discovery of Penicillin—New Insights After More Than 75 Years of Clinical  
527 Use. *Emerg Infect Dis*. 2017;23: 849.
- 528 21. Netzker T, Flak M, Krespach MK, Stroe MC, Weber J, Schroeckh V, et al. Microbial  
529 interactions trigger the production of antibiotics. *Curr Opin Microbiol*. 2018;45: 117–123.
- 530 22. Busi SB, Pramateftaki P, Brandani J, Fodelianakis S, Peter H, Halder R, et al. Optimised  
531 biomolecular extraction for metagenomic analysis of microbial biofilms from high-mountain  
532 streams. *PeerJ*. 2020;8: e9973.
- 533 23. Narayanasamy S, Jarosz Y, Muller EEL, Heintz-Buschart A, Herold M, Kaysen A, et al.  
534 IMP: a pipeline for reproducible reference-independent integrated metagenomic and  
535 metatranscriptomic analyses. *Genome Biol*. 2016;17: 260.
- 536 24. de Nies L, Lopes S, Busi SB, Galata V, Heintz-Buschart A, Laczny CC, et al. PathoFact: a  
537 pipeline for the prediction of virulence factors and antimicrobial resistance genes in  
538 metagenomic data. *Microbiome*. 2021;9: 49.
- 539 25. Alcock BP, Raphenya AR, Lau TTY, Tsang KK, Bouchard M, Edalatmand A, et al. CARD



- 540           2020: antibiotic resistome surveillance with the comprehensive antibiotic resistance  
541           database. *Nucleic Acids Res.* 2020;48: D517–D525.
- 542   26. Liao Y, Smyth GK, Shi W. featureCounts: An efficient general-purpose program for  
543           assigning sequence reads to genomic features. *arXiv [q-bio.GN]*. 2013. Available:  
544           <http://arxiv.org/abs/1305.3347>
- 545   27. Yoon B-J. Hidden Markov Models and their Applications in Biological Sequence Analysis.  
546           *Curr Genomics.* 2009;10: 402–415.
- 547   28. Eddy SR. Accelerated Profile HMM Searches. *PLoS Comput Biol.* 2011;7: e1002195.
- 548   29. Blin K, Shaw S, Kloosterman AM, Charlop-Powers Z, van Wezel GP, Medema MH, et al.  
549           antiSMASH 6.0: improving cluster detection and comparison capabilities. *Nucleic Acids*  
550           *Res.* 2021;49: W29–W35.
- 551   30. Hannigan GD, Pihoda D, Palicka A, Soukup J, Klempir O, Rampula L, et al. A deep  
552           learning genome-mining strategy for biosynthetic gene cluster prediction. *Nucleic Acids*  
553           *Res.* 2019;47: e110.
- 554   31. Hu Y, Yang X, Qin J, Lu N, Cheng G, Wu N, et al. Metagenome-wide analysis of antibiotic  
555           resistance genes in a large cohort of human gut microbiota. *Nat Commun.* 2013;4: 2151.
- 556   32. Computing R, Others. R: A language and environment for statistical computing. Vienna: R  
557           Core Team. 2013. Available: [https://www.yumpu.com/en/document/view/6853895/r-a-](https://www.yumpu.com/en/document/view/6853895/r-a-language-and-environment-for-statistical-computing)  
558           [language-and-environment-for-statistical-computing](https://www.yumpu.com/en/document/view/6853895/r-a-language-and-environment-for-statistical-computing)
- 559   33. Wickham H, Averick M, Bryan J, Chang W, McGowan L, François R, et al. Welcome to the  
560           tidyverse. *J Open Source Softw.* 2019;4: 1686.
- 561   34. Brunson J. ggalluvial: Layered Grammar for Alluvial Plots. *J Open Source Softw.* 2020;5:  
562           2017.

- 563 35. Gu Z, Eils R, Schlesner M. Complex heatmaps reveal patterns and correlations in  
564 multidimensional genomic data. *Bioinformatics*. 2016;32: 2847–2849.
- 565 36. Krause KM, Serio AW, Kane TR, Connolly LE. Aminoglycosides: An Overview. *Cold Spring*  
566 *Harb Perspect Med*. 2016;6. doi:10.1101/cshperspect.a027029
- 567 37. Tahlan K, Jensen SE. Origins of the  $\beta$ -lactam rings in natural products. *J Antibiot* . 2013;66:  
568 401–410.
- 569 38. Borges-Walmsley MI, McKeegan KS, Walmsley AR. Structure and function of efflux pumps  
570 that confer resistance to drugs. *Biochem J*. 2003;376: 313–338.
- 571 39. Kanehisa M, Goto S. KEGG: Kyoto Encyclopedia of Genes and Genomes. *Nucleic Acids*  
572 *Res*. 2000;28: 27–30.
- 573 40. Tortorella E, Tedesco P, Palma Esposito F, January GG, Fani R, Jaspars M, et al.  
574 *Antibiotics from Deep-Sea Microorganisms: Current Discoveries and Perspectives*. *Mar*  
575 *Drugs*. 2018;16. doi:10.3390/md16100355
- 576 41. McCann CM, Christgen B, Roberts JA, Su J-Q, Arnold KE, Gray ND, et al. Understanding  
577 drivers of antibiotic resistance genes in High Arctic soil ecosystems. *Environ Int*. 2019;125:  
578 497–504.
- 579 42. Yuan K, Yu K, Yang R, Zhang Q, Yang Y, Chen E, et al. Metagenomic characterization of  
580 antibiotic resistance genes in Antarctic soils. *Ecotoxicol Environ Saf*. 2019;176: 300–308.
- 581 43. Centurion VB, Delforno TP, Lacerda-Júnior GV, Duarte AWF, Silva LJ, Bellini GB, et al.  
582 *Unveiling resistome profiles in the sediments of an Antarctic volcanic island*. *Environ Pollut*.  
583 2019;255: 113240.
- 584 44. Van Goethem MW, Pierneef R, Bezuidt OKI, Van De Peer Y, Cowan DA, Makhalanyane  
585 TP. A reservoir of “historical” antibiotic resistance genes in remote pristine Antarctic soils.

- 586 Microbiome. 2018;6: 40.
- 587 45. Brown JR, Zhang J, Hodgson JE. A bacterial antibiotic resistance gene with eukaryotic  
588 origins. *Curr Biol.* 1998;8: R365–7.
- 589 46. Fairlamb AH, Gow NAR, Matthews KR, Waters AP. Drug resistance in eukaryotic  
590 microorganisms. *Nat Microbiol.* 2016;1: 16092.
- 591 47. Silva A, Silva SA, Carpena M, Garcia-Oliveira P, Gullón P, Barroso MF, et al. Macroalgae  
592 as a Source of Valuable Antimicrobial Compounds: Extraction and Applications. *Antibiotics*  
593 (Basel). 2020;9. doi:10.3390/antibiotics9100642
- 594 48. Martins RM, Nedel F, Guimarães VBS, da Silva AF, Colepicolo P, de Pereira CMP, et al.  
595 Macroalgae Extracts From Antarctica Have Antimicrobial and Anticancer Potential. *Front*  
596 *Microbiol.* 2018;9: 412.
- 597 49. Karkman A, Pärnänen K, Larsson DGJ. Fecal pollution can explain antibiotic resistance  
598 gene abundances in anthropogenically impacted environments. *Nat Commun.* 2019;10: 80.
- 599 50. Antelo V, Giménez M, Azziz G, Valdespino-Castillo P, Falcón LI, Ruberto LAM, et al.  
600 Metagenomic strategies identify diverse integron-integrase and antibiotic resistance genes  
601 in the Antarctic environment. *Microbiologyopen.* 2021;10. doi:10.1002/mbo3.1219
- 602 51. Hernández F, Calisto-Ulloa N, Gómez-Fuentes C, Gómez M, Ferrer J, González-Rocha G,  
603 et al. Occurrence of antibiotics and bacterial resistance in wastewater and sea water from  
604 the Antarctic. *J Hazard Mater.* 2019;363: 447–456.
- 605 52. Reygaert WC. An overview of the antimicrobial resistance mechanisms of bacteria. *AIMS*  
606 *Microbiol.* 2018;4: 482–501.
- 607 53. Granato ET, Meiller-Legrand TA, Foster KR. The Evolution and Ecology of Bacterial  
608 Warfare. *Curr Biol.* 2019;29: R521–R537.

- 609 54. Waschulin V, Borsetto C, James R, Newsham KK, Donadio S, Corre C, et al. Biosynthetic  
610 potential of uncultured Antarctic soil bacteria revealed through long-read metagenomic  
611 sequencing. *ISME J.* 2021. doi:10.1038/s41396-021-01052-3
- 612 55. Liao L, Su S, Zhao B, Fan C, Zhang J, Li H, et al. Biosynthetic Potential of a Novel Antarctic  
613 Actinobacterium *Marisediminicola antarctica* ZS314T Revealed by Genomic Data Mining  
614 and Pigment Characterization. *Mar Drugs.* 2019;17. doi:10.3390/md17070388
- 615 56. Hug LA, Baker BJ, Anantharaman K, Brown CT, Probst AJ, Castelle CJ, et al. A new view  
616 of the tree of life. *Nat Microbiol.* 2016;1: 16048.
- 617 57. Tian R, Ning D, He Z, Zhang P, Spencer SJ, Gao S, et al. Small and mighty: adaptation of  
618 superphylum Patescibacteria to groundwater environment drives their genome simplicity.  
619 *Microbiome.* 2020;8: 51.
- 620 58. Vigneron A, Cruaud P, Langlois V, Lovejoy C, Culley AI, Vincent WF. Ultra-small and  
621 abundant: Candidate phyla radiation bacteria are potential catalysts of carbon  
622 transformation in a thermokarst lake ecosystem. *Limnol Oceanogr Lett.* 2020;5: 212–220.
- 623 59. Maatouk M, Ibrahim A, Rolain J-M, Merhej V, Bittar F. Small and equipped: the rich  
624 repertoire of antibiotic resistance genes in Candidate Phyla Radiation genomes. *bioRxiv.*  
625 2021. p. 2021.07.02.450847. doi:10.1101/2021.07.02.450847
- 626 60. Bottery MJ, Pitchford JW, Friman V-P. Ecology and evolution of antimicrobial resistance in  
627 bacterial communities. *ISME J.* 2021;15: 939–948.
- 628 61. Bottery MJ, Passaris I, Dytham C, Wood AJ, van der Woude MW. Spatial Organization of  
629 Expanding Bacterial Colonies Is Affected by Contact-Dependent Growth Inhibition. *Curr*  
630 *Biol.* 2019;29: 3622–3634.e5.
- 631 62. Schluter J, Nadell CD, Bassler BL, Foster KR. Adhesion as a weapon in microbial

- 632 competition. *ISME J.* 2015;9: 139–149.
- 633 63. Stubbendieck RM, Straight PD. Multifaceted Interfaces of Bacterial Competition. *J*  
634 *Bacteriol.* 2016;198: 2145–2155.
- 635 64. Estrela S, Brown SP. Community interactions and spatial structure shape selection on  
636 antibiotic resistant lineages. *PLoS Comput Biol.* 2018;14: e1006179.
- 637 65. Varrette S, Bouvry P, Cartiaux H, Georgatos F. Management of an academic HPC cluster:  
638 The UL experience. 2014 International Conference on High Performance Computing  
639 Simulation (HPCS). 2014. pp. 959–967.

Figure 1

a

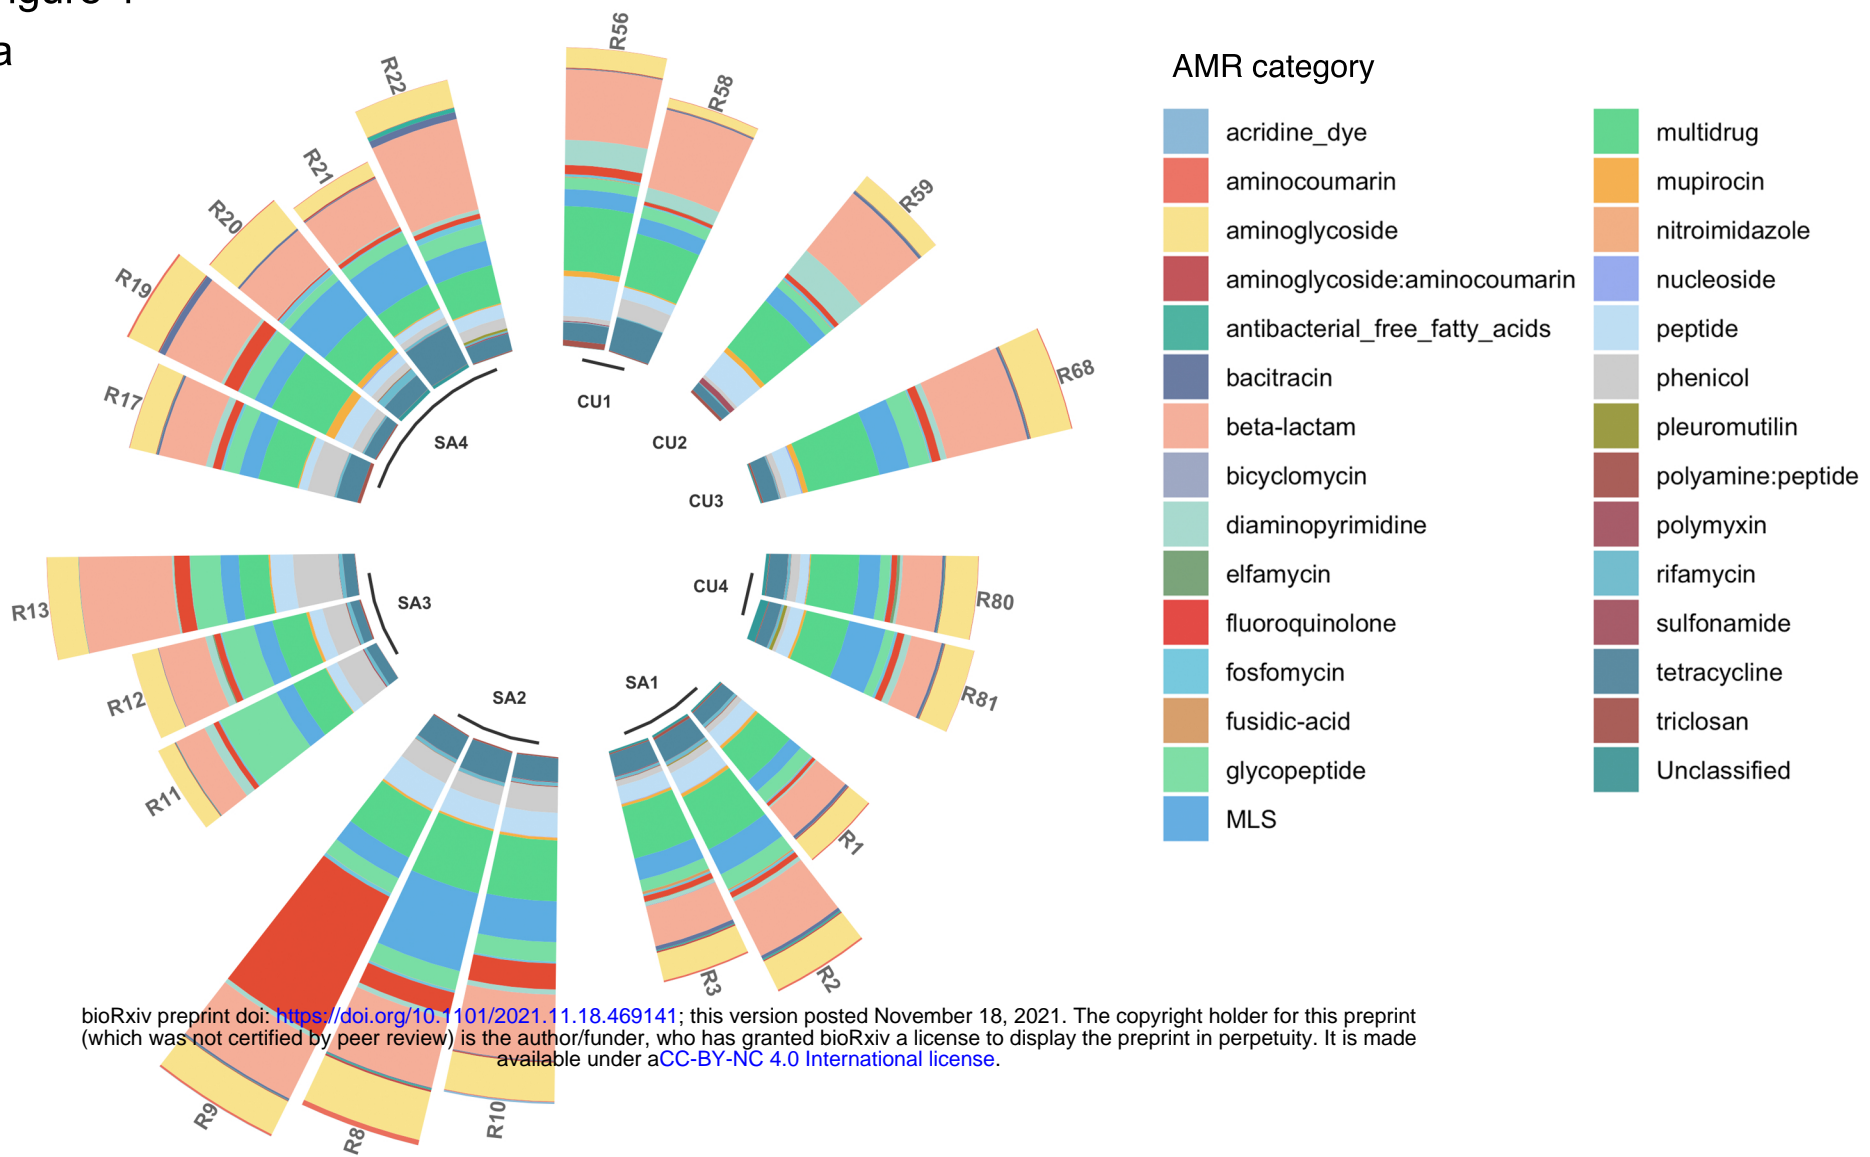

b

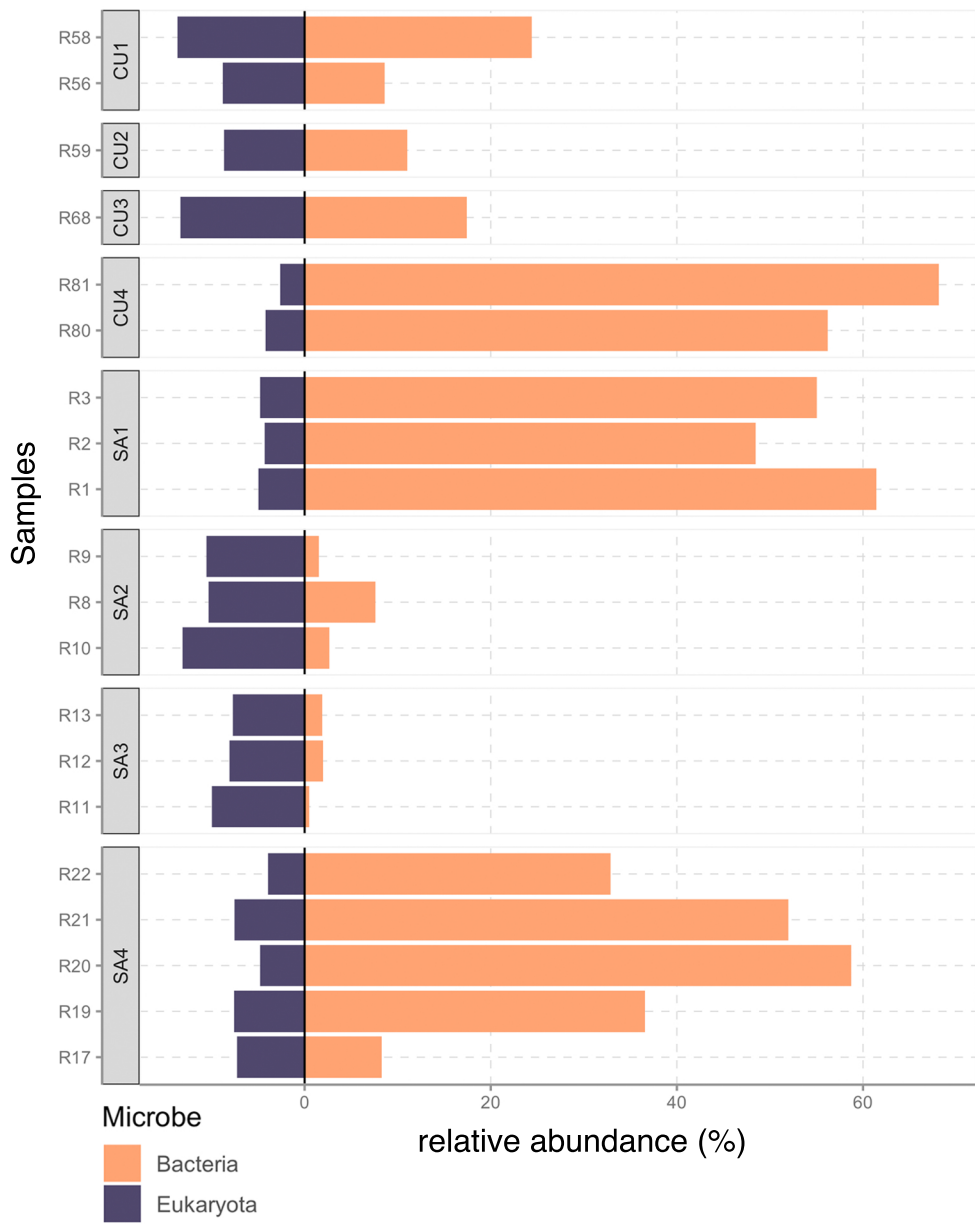

c

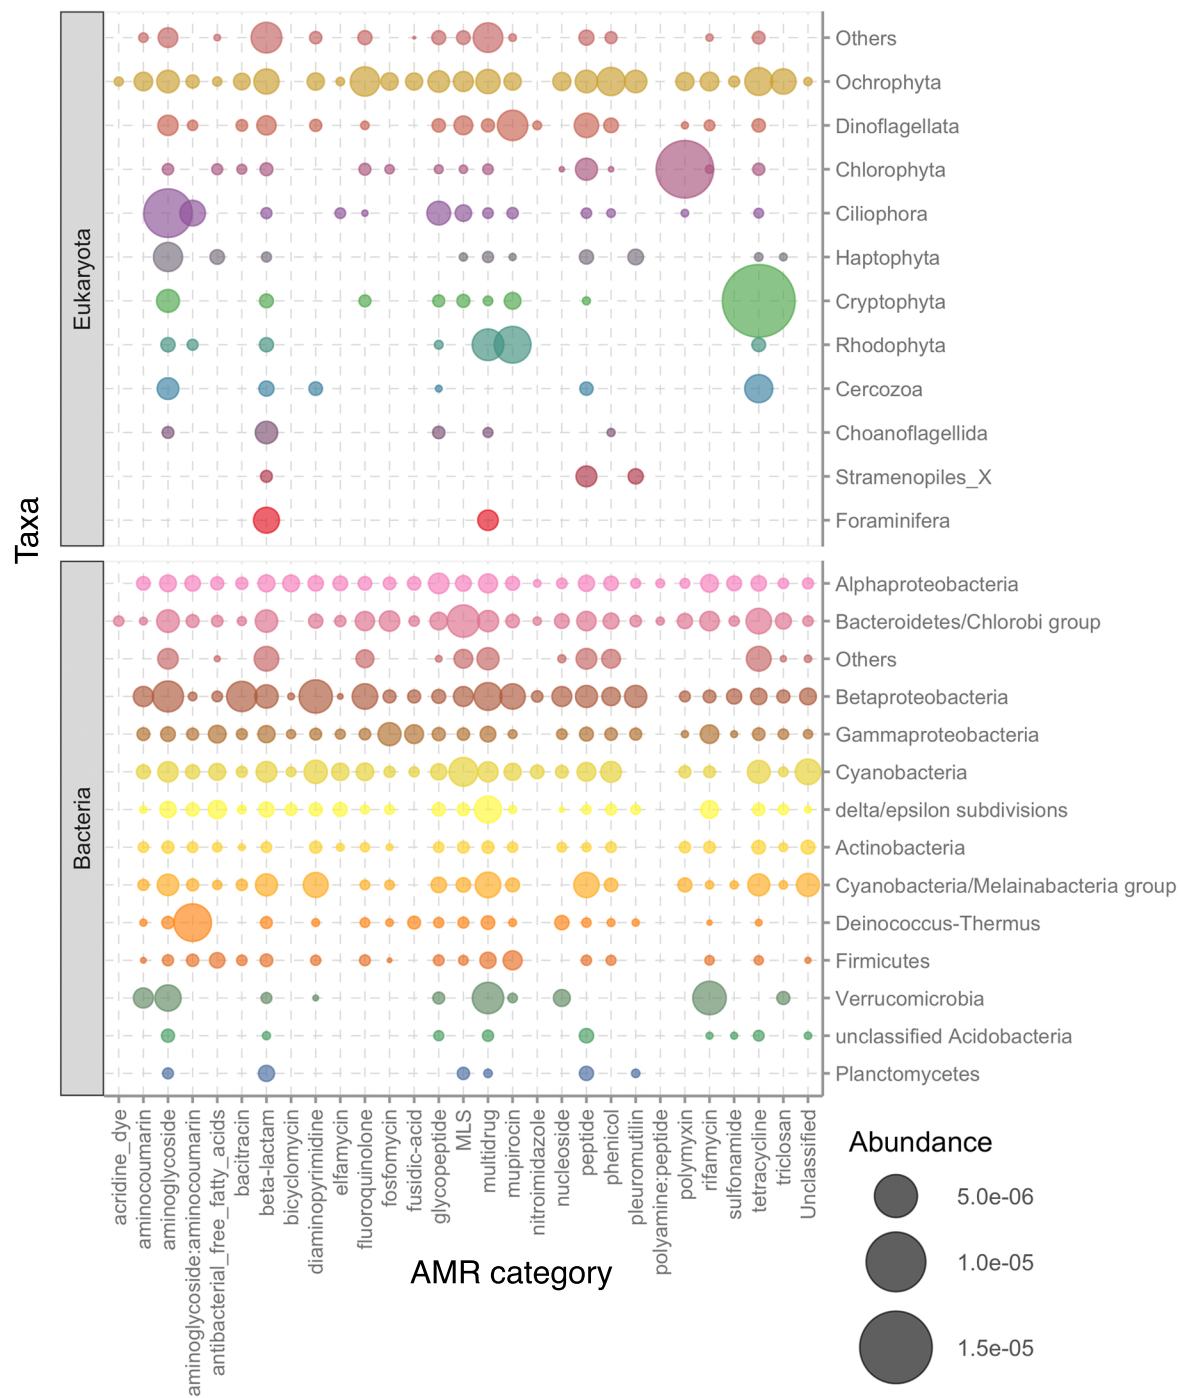

Figure 2

a

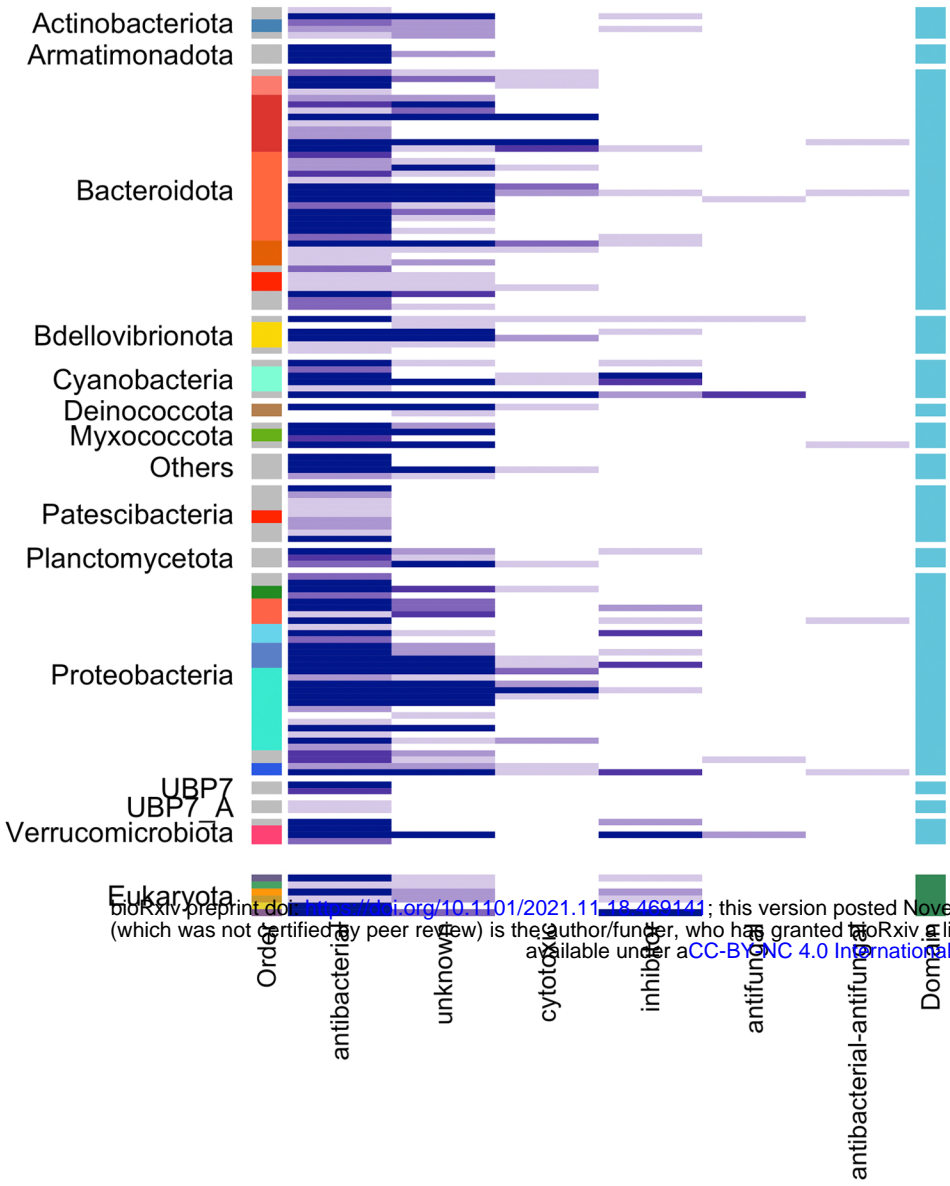

b

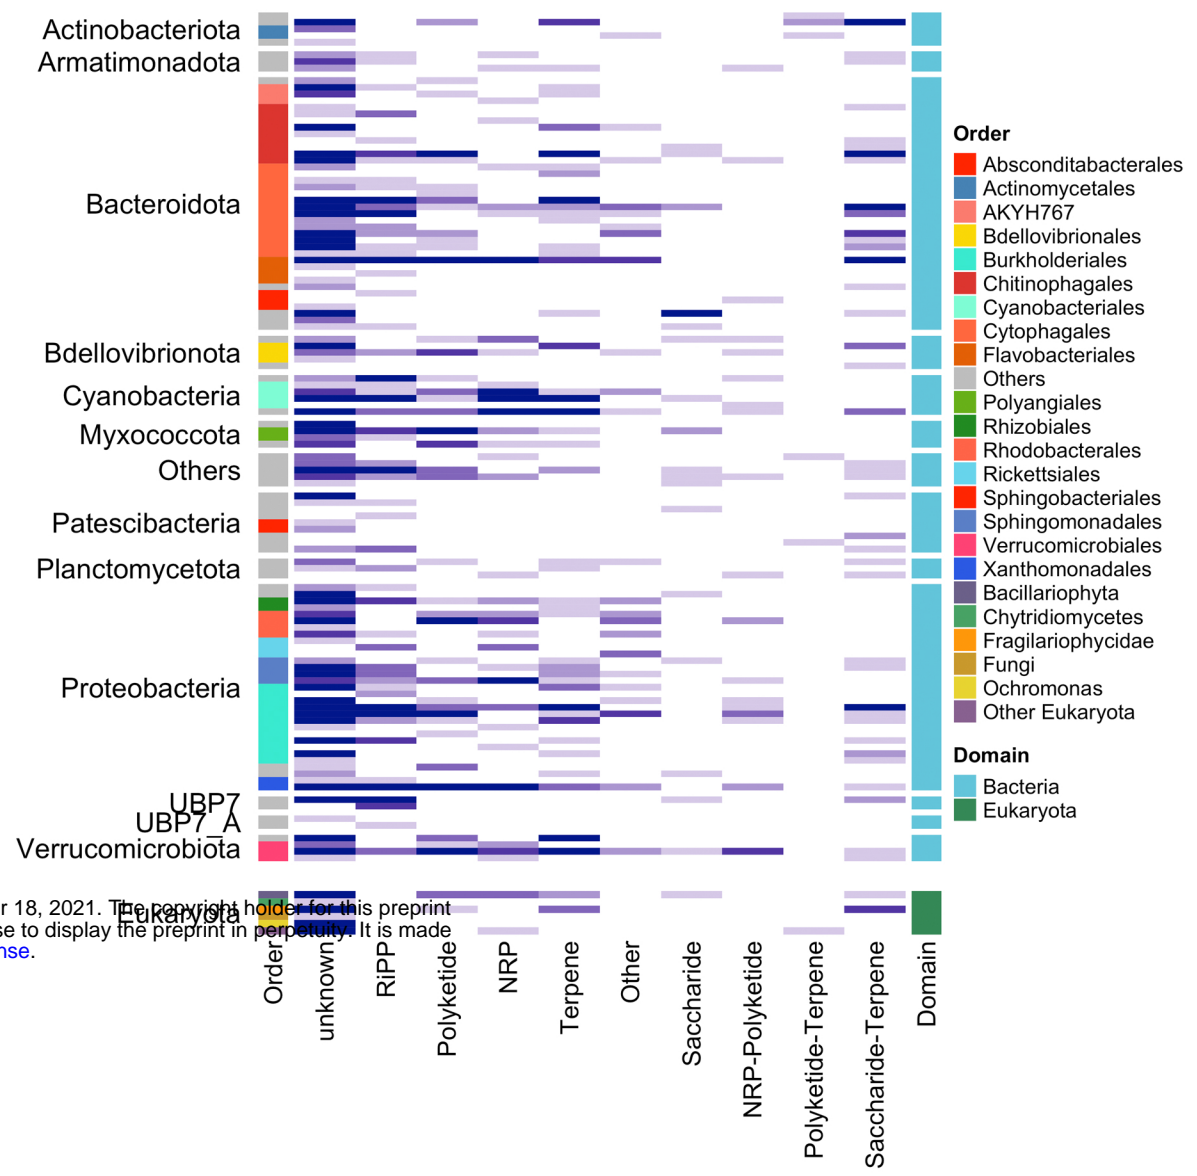

bioRxiv preprint doi: <https://doi.org/10.1101/2021.11.18.469144>; this version posted November 18, 2021. The copyright holder for this preprint (which was not certified by peer review) is the author/funder, who has granted bioRxiv a license to display the preprint in perpetuity. It is made available under aCC-BY-NC 4.0 International license.

c

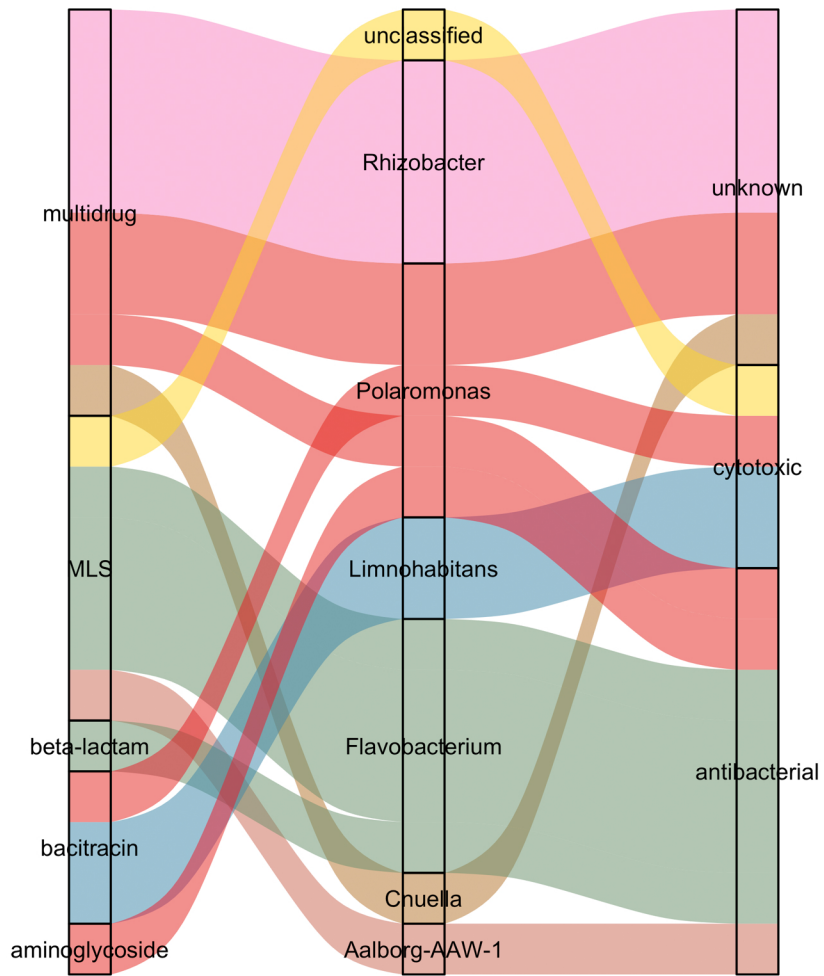

# Supplementary Figure 1

a

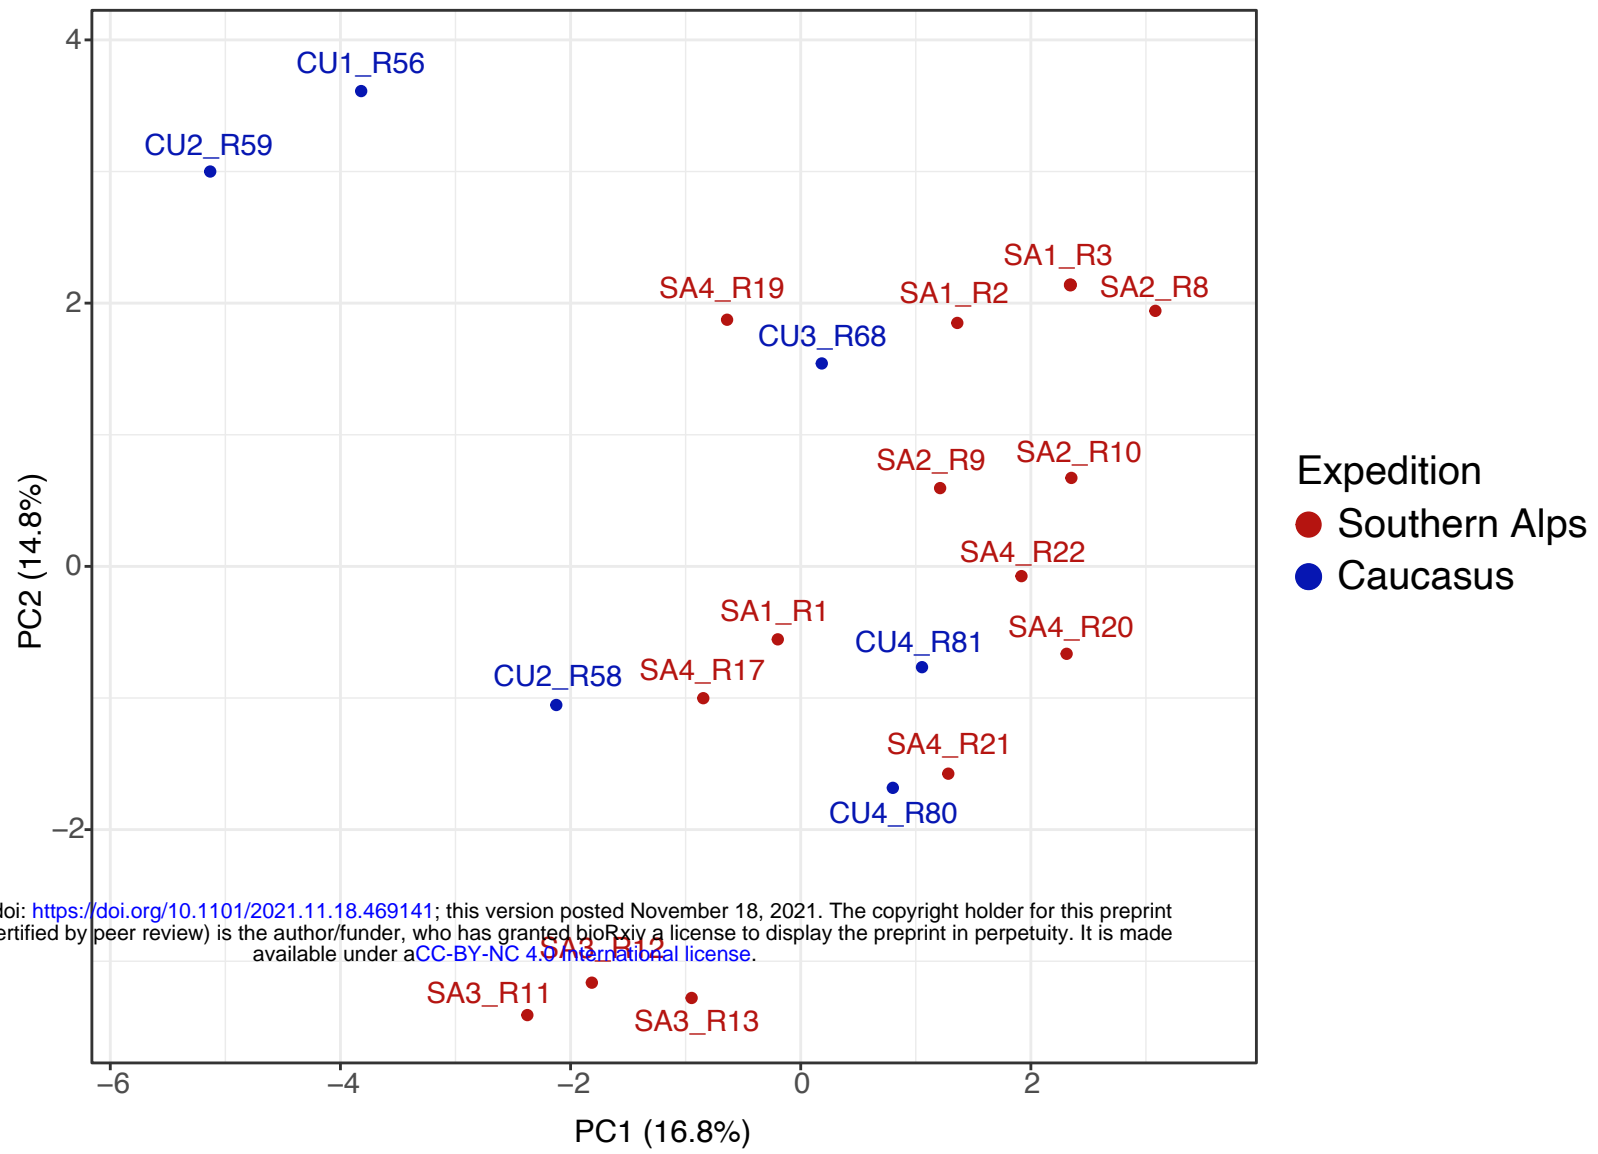

b

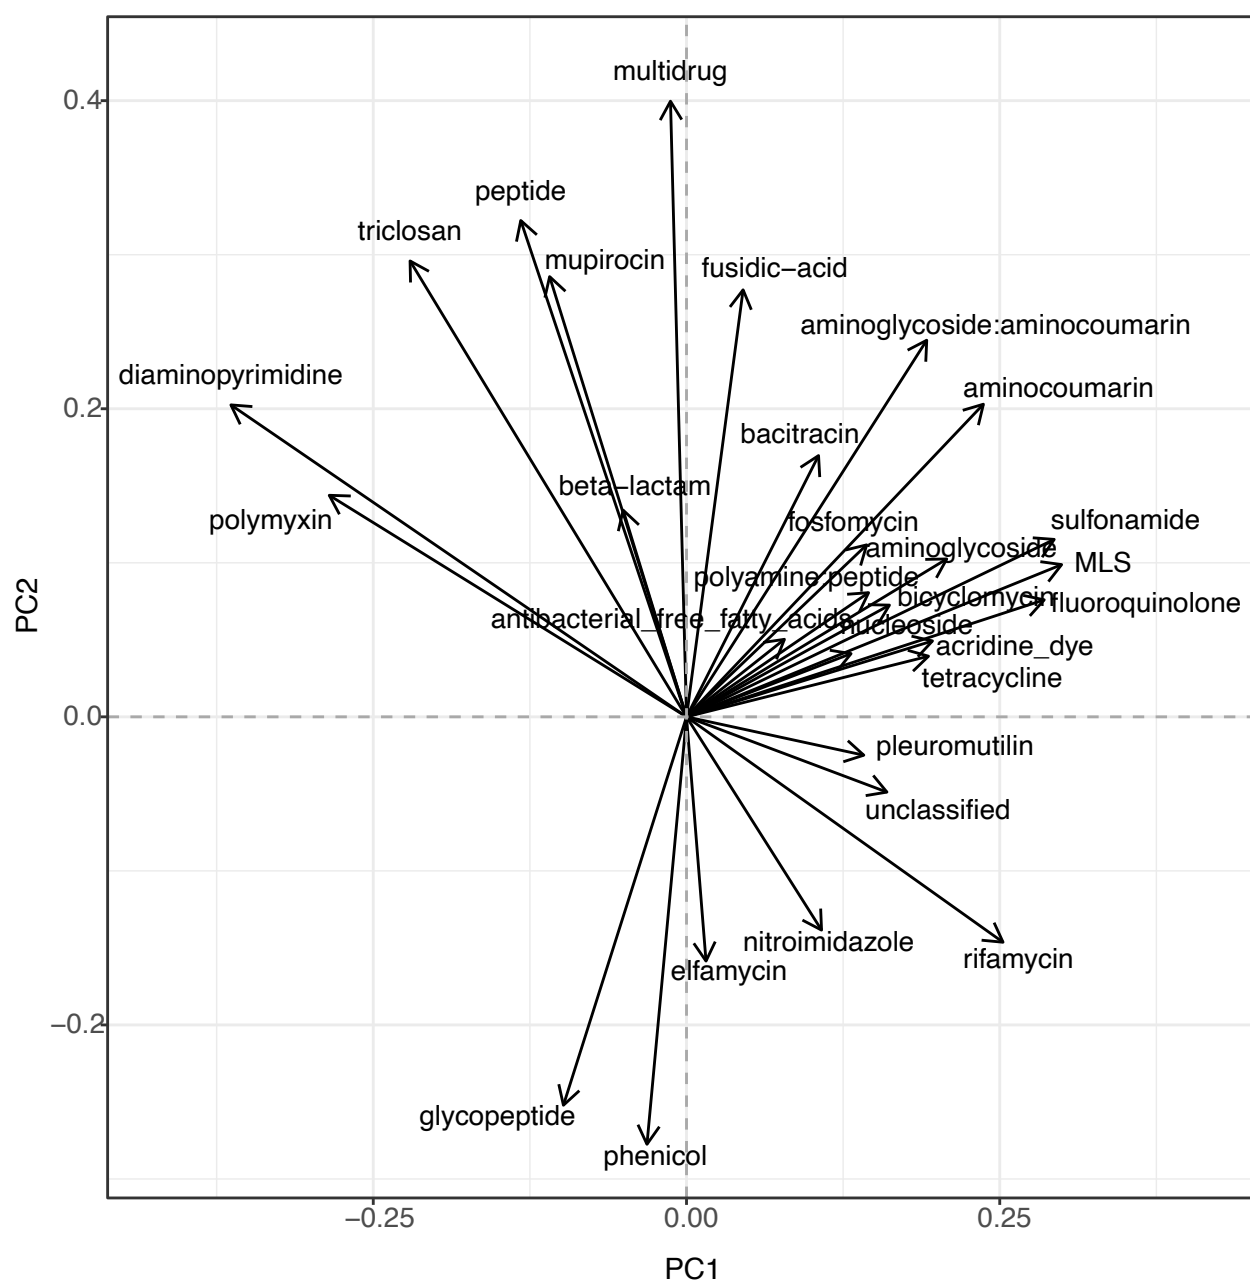



Supplementary Figure 2

a

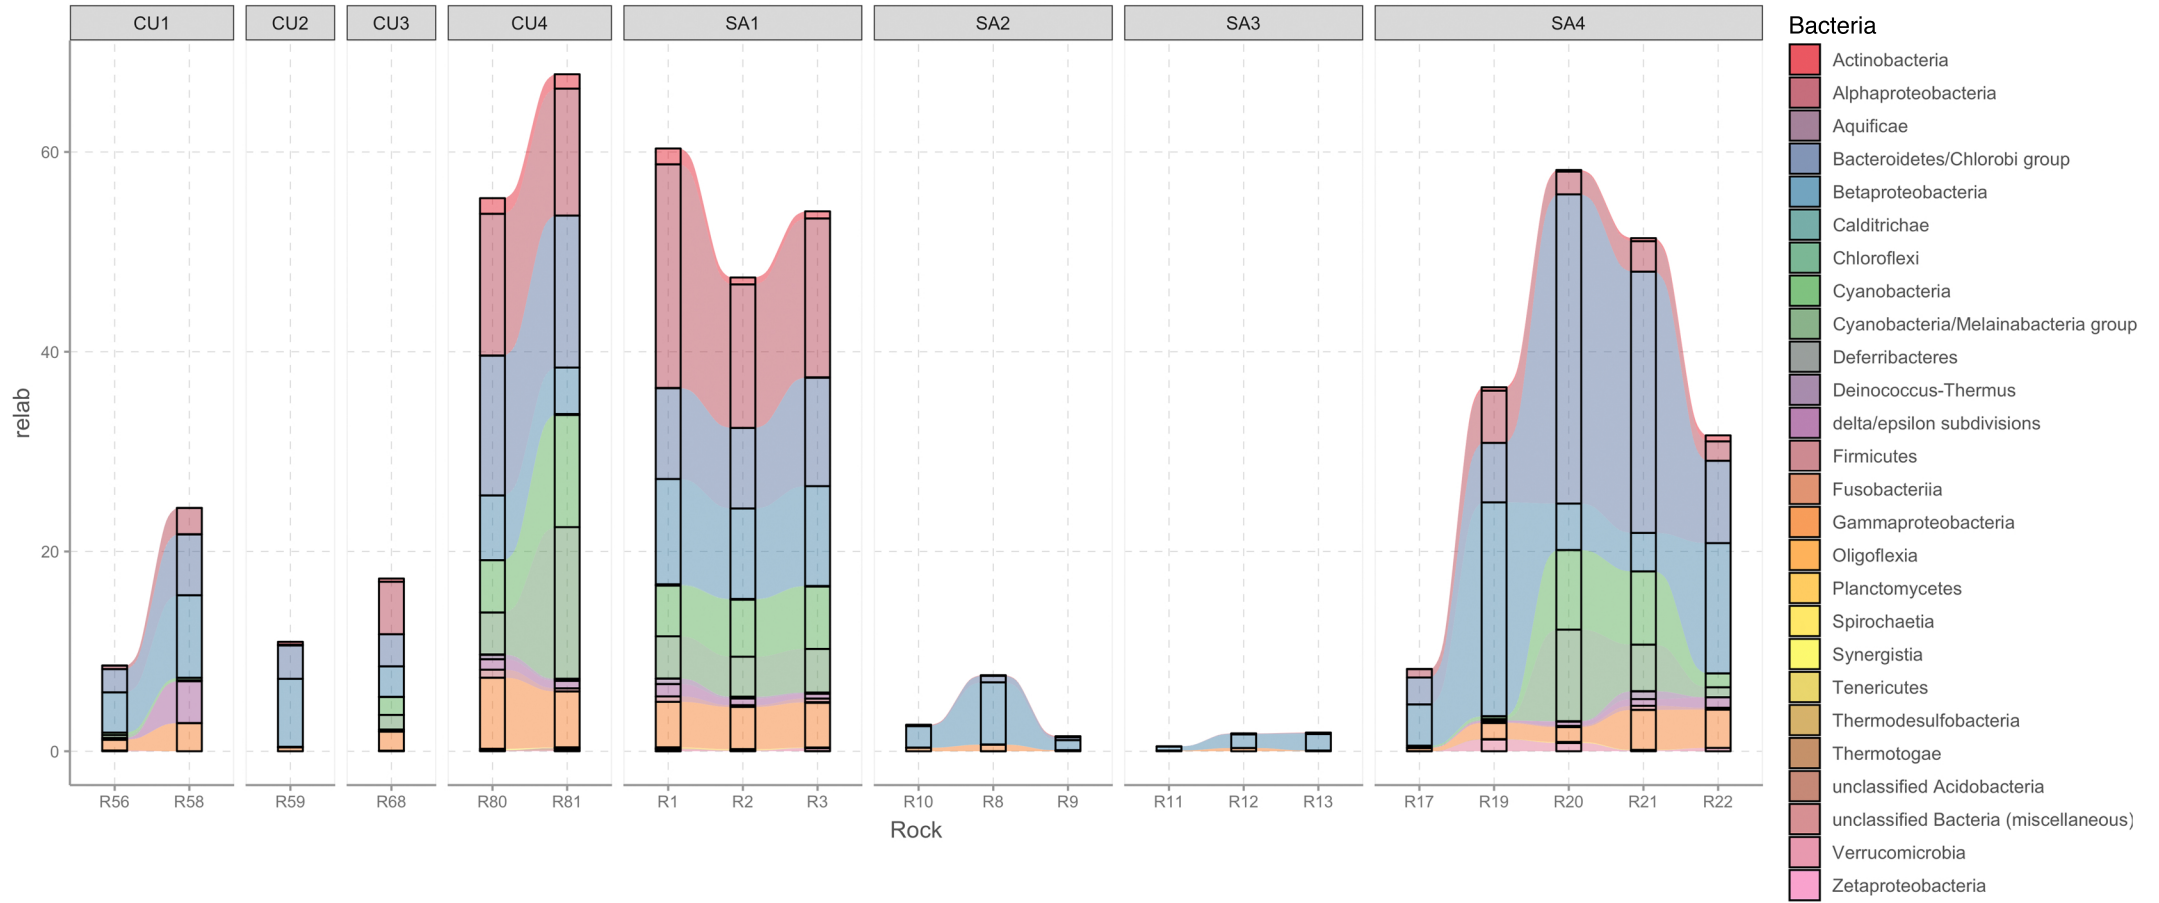

b

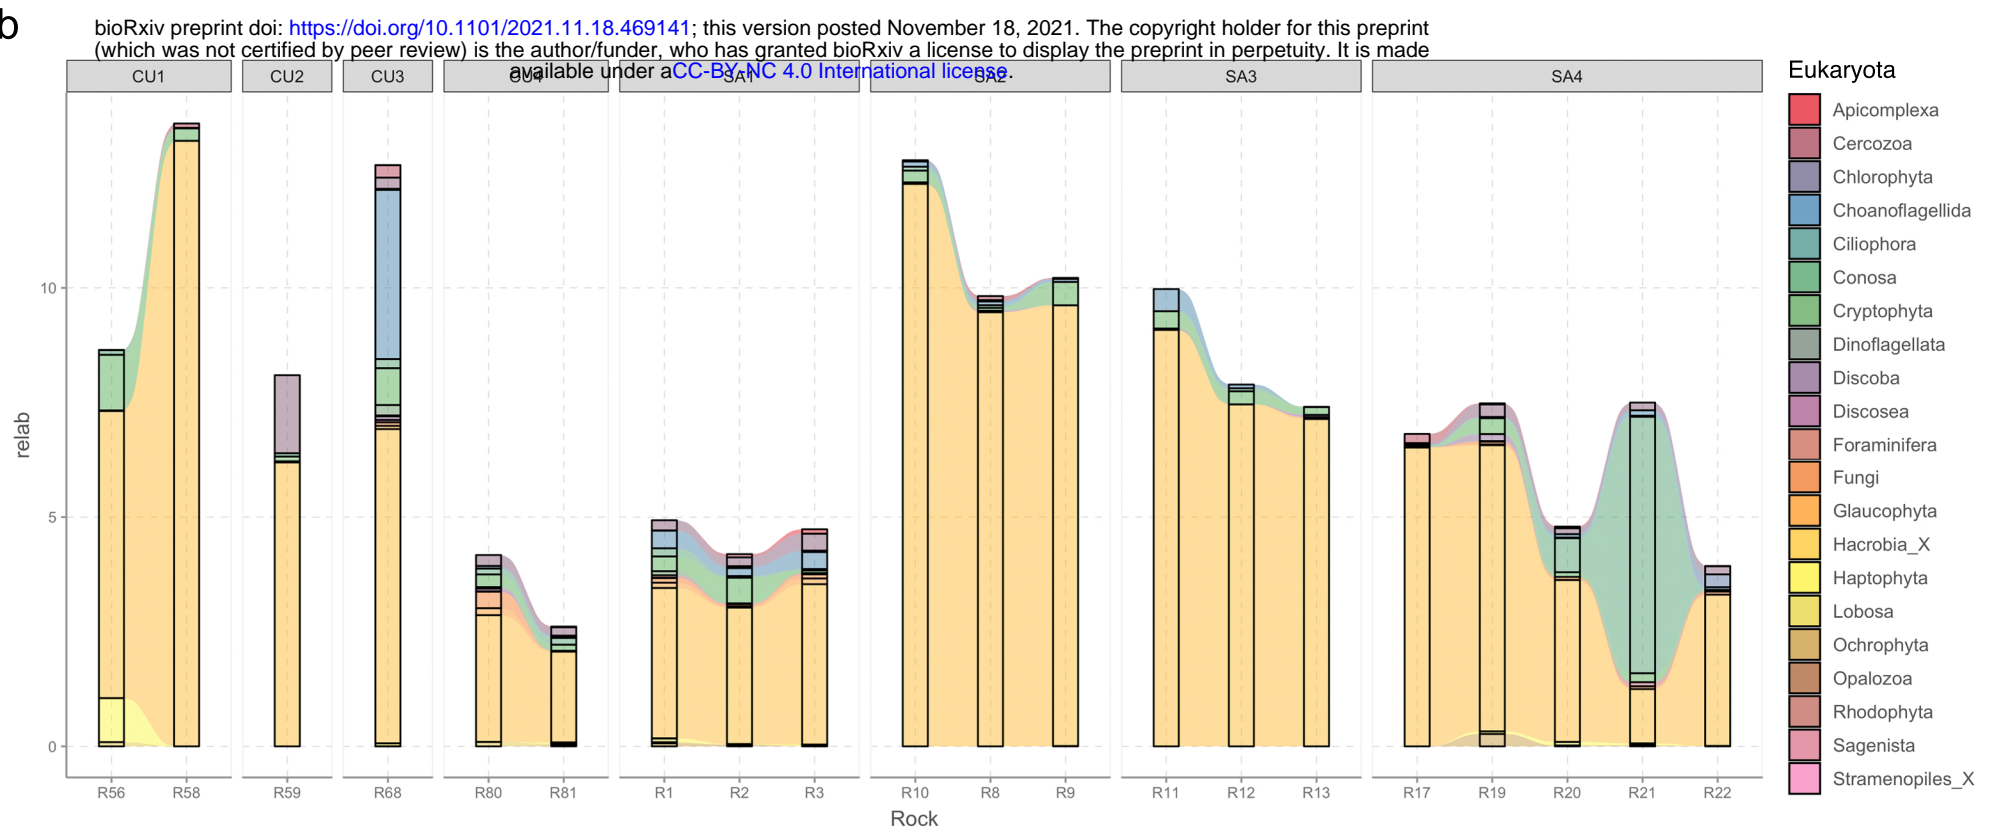

# Supplementary Figure 3

a

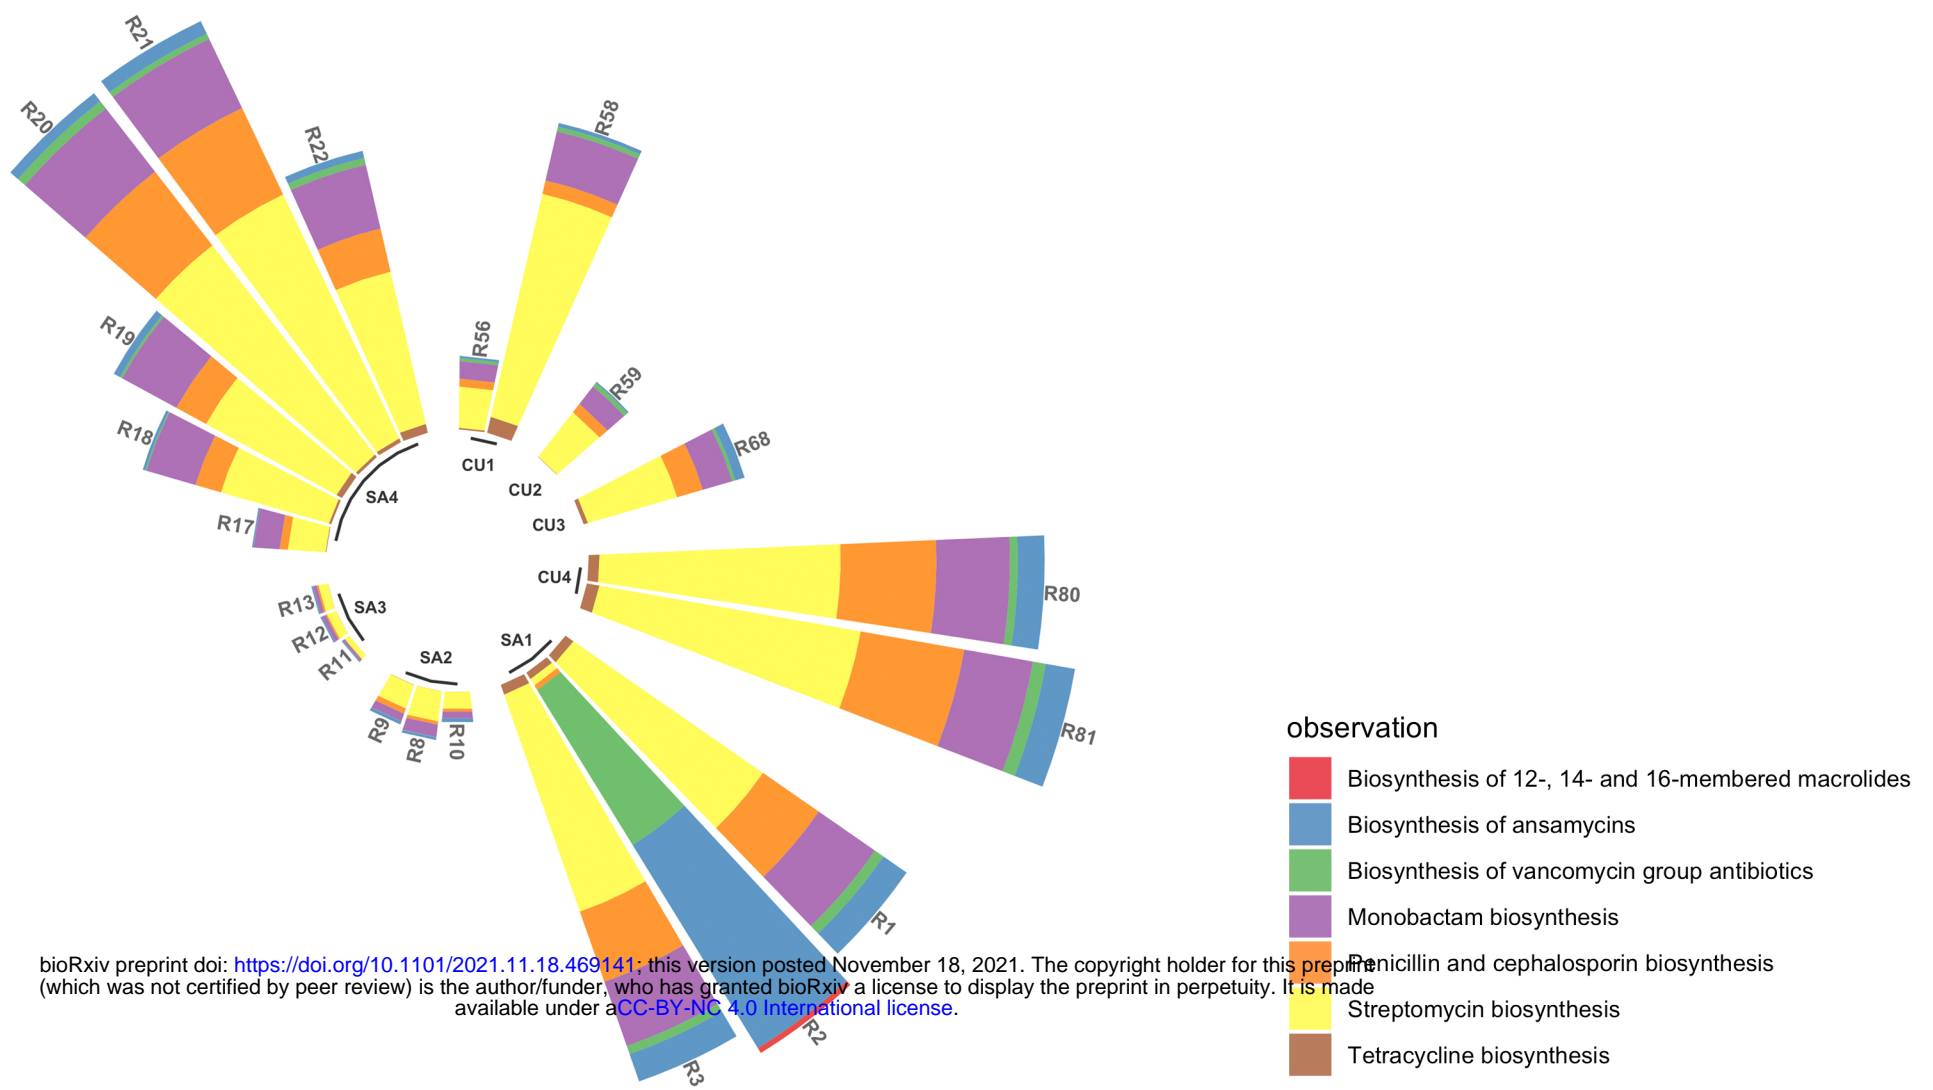

b

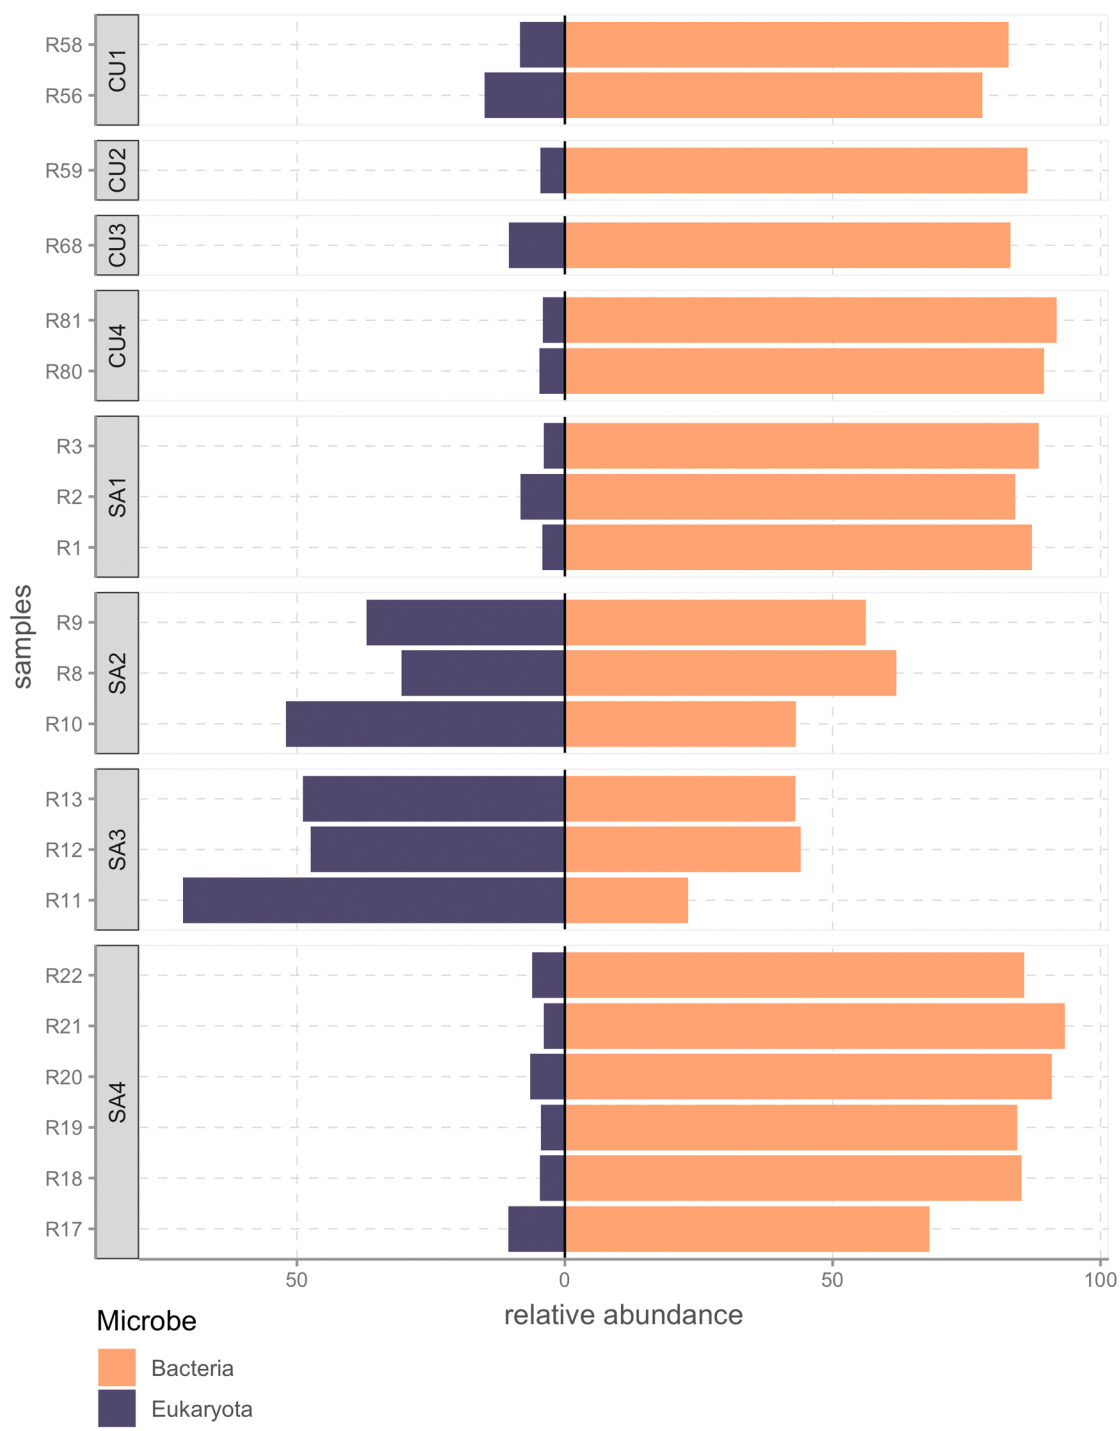

c

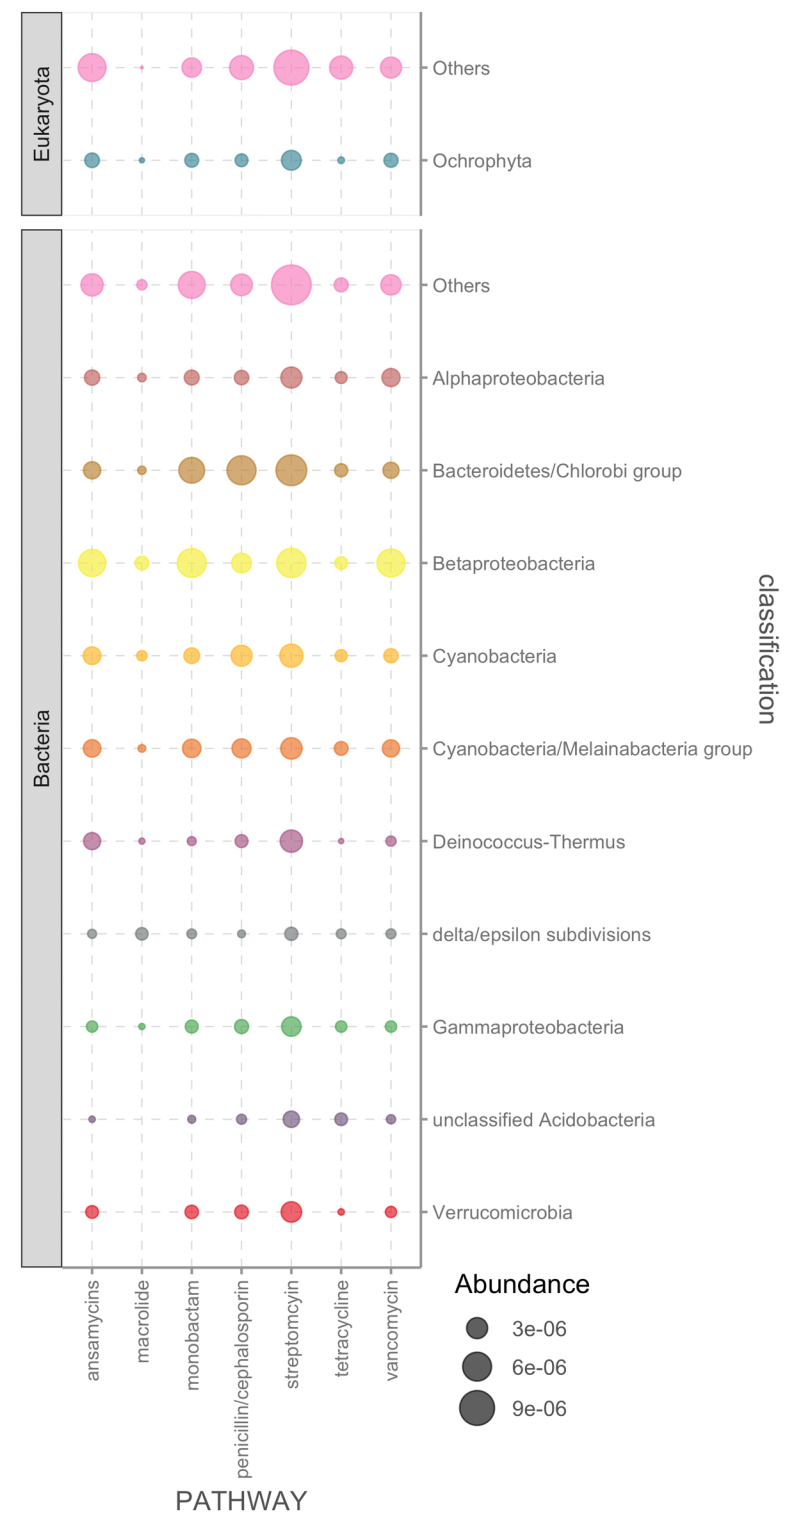

Source: https://biorxiv.org/content/10.1101/2021.11.18.469141v1.full.pdf
