# 1 Glacier-fed stream biofilms harbour diverse 2 resistomes and biosynthetic gene clusters

3  
4 Susheel Bhanu Busi<sup>1,#,\*</sup>, Laura de Nies<sup>1,#</sup>, Paraskevi Pramateftaki<sup>2</sup>, Massimo Bourquin<sup>2</sup>,  
5 Leïla Ezzat<sup>2</sup>, Tyler J. Kohler<sup>2</sup>, Stilianos Fodelianakis<sup>2</sup>, Grégoire Michoud<sup>2</sup>, Hannes Peter<sup>2</sup>,  
6 Michail Styllas<sup>2</sup>, Matteo Tolosano<sup>2</sup>, Vincent De Staercke<sup>2</sup>, Martina Schön<sup>2</sup>, Valentina  
7 Galata<sup>1</sup>, Paul Wilmes<sup>1,\*</sup> and Tom Battin<sup>2</sup>

8  
9 <sup>1</sup>Systems Ecology Group, Luxembourg Centre for Systems Biomedicine, University of  
10 Luxembourg, Esch-sur-Alzette, Luxembourg

11 <sup>2</sup>Stream Biofilm & Ecosystem Research Lab, ENAC, Ecole Polytechnique Fédérale de  
12 Lausanne, Lausanne, Switzerland

13  
14 #Contributed equally to this work

15  
16 \*Corresponding author(s):  
17 Prof. Paul Wilmes (paul.wilmes@uni.lu)  
18 Susheel Bhanu Busi (susheel.busi@uni.lu)

19  
20 *Running title: Resistome and biosynthetic gene clusters of glacier-fed streams*

21  
22 Keywords: glacier-fed streams, metagenomics, antimicrobial resistance, biosynthetic gene  
23 clusters, cross-domain interactions

## 24 **Abstract**

### 25 **Background**

26 Antimicrobial resistance (AMR) is a universal phenomenon whose origins lay in natural  
27 ecological interactions such as competition within niches, within and between micro- to  
28 higher-order organisms. However, the ecological and evolutionary processes shaping  
29 AMR need to be better understood in view of better antimicrobial stewardship. Resolving  
30 antibiotic biosynthetic pathways, including biosynthetic gene clusters (BGCs), and  
31 corresponding antimicrobial resistance genes (ARGs) may therefore help in  
32 understanding the inherent mechanisms. However, to study these phenomena, it is  
33 crucial to examine the origins of AMR in pristine environments with limited anthropogenic  
34 influences. In this context, epilithic biofilms residing in glacier-fed streams (GFSs) are an  
35 excellent model system to study diverse, intra- and inter-domain, ecological crosstalk.

36

### 37 **Results**

38 We assessed the resistomes of epilithic biofilms from GFSs across the Southern Alps  
39 (New Zealand) and the Caucasus (Russia) and observed that both bacteria and  
40 eukaryotes encoded twenty-nine distinct AMR categories. Of these, beta-lactam,  
41 aminoglycoside, and multidrug resistance were both abundant and taxonomically  
42 distributed in most of the bacterial and eukaryotic phyla. AMR-encoding phyla included  
43 Bacteroidota and Proteobacteria among the bacteria, alongside Ochrophyta (algae)  
44 among the eukaryotes. Additionally, BGCs involved in the production of antibacterial  
45 compounds were identified across all phyla in the epilithic biofilms. Furthermore, we found  
46 that several bacterial genera (*Flavobacterium*, *Polaromonas*, etc.) including  
47 representatives of the superphylum Patescibacteria encode both ARGs and BGCs within

48 close proximity of each other, thereby demonstrating their capacity to simultaneously  
49 influence and compete within the microbial community.

50

## 51 **Conclusions**

52 Our findings highlight the presence and abundance of AMR in epilithic biofilms within  
53 GFSs. Additionally, we identify their role in the complex intra- and inter-domain  
54 competition and the underlying mechanisms influencing microbial survival in GFS epilithic  
55 biofilms. We demonstrate that eukaryotes may serve as AMR reservoirs owing to their  
56 potential for encoding ARGs. We also find that the taxonomic affiliation of the AMR and  
57 the BGCs are congruent. Importantly, our findings allow for understanding how naturally  
58 occurring BGCs and AMR contribute to the epilithic biofilms mode of life in GFSs.  
59 Importantly, these observations may be generalizable and potentially extended to other  
60 environments which may be more or less impacted by human activity.

61

## 62 **Background**

63 Today, antimicrobial resistance (AMR) has become a well-known threat to human health  
64 with an estimated number of 700,000 people per year dying of drug-resistant infections  
65 [1]. The dramatic rise of antimicrobial resistance over the past decade has even led to the  
66 moniker, “silent pandemic” [2]. Therefore, AMR is often directly associated with human  
67 impacted environments with a global increase in resistant bacteria linked to the over- and  
68 mis-use of antibiotics [3]. However, contrary to public perception, AMR is a natural  
69 phenomenon, which has existed for billions of years [4]. Long before the rather recent  
70 use of antibiotics in the clinical setting, microorganisms have used these, along with  
71 corresponding protective mechanisms, to establish competitive advantages over other  
72 microbes contending for the same environment and/or resources [5].

73

74 Microbes, in general, produce a range of secondary metabolites with diverse chemical  
75 structures which in turn confer a variety of functions, including antibiotics [6]. Such  
76 secondary metabolites including metal transporters and quorum sensing molecules [7,8]  
77 are not directly associated with the growth of microorganisms themselves but instead are  
78 known to provide benefits by acting as growth inhibitors against competing bacteria.  
79 Consequently, many of these natural products have found their uses in industrial settings  
80 as well as in human medicine as anti-infective drugs [7,9,10]. The biosynthetic pathways  
81 responsible for producing these specialized metabolites are encoded by locally clustered  
82 groups of genes known as ‘biosynthetic gene clusters’ (BGCs). Typically, BGCs include  
83 genes for expression control, self-resistance, and metabolite export [11]. They can,  
84 however, be further divided into various classes including non-ribosomal peptide  
85 synthetases (NRPSs), type I and type II polyketide synthases (PKSs), terpenes, and



86 bacteriocins alongside others [10]. NRPSs and PKSs specifically have been of interest  
87 due to their known synthesis of putative antibiotics [12,13]. Furthermore, evidence  
88 suggests that within these BGCs at least one resistance gene conferring resistance can  
89 be found as a self-defense mechanism against the potentially harmful secondary  
90 metabolites encoded by the BGC [14]. For instance, the tylosin-biosynthetic gene cluster  
91 of *Streptomyces fradiae* also encodes three resistance genes (*tlrB*, *tlrC* and *tlrD*) [15],  
92 while in another example, *Streptomyces toyacaensis*, the *vanHAX* resistance cassette is  
93 proximal to the vancomycin biosynthesis gene cluster, thereby encoding inherent  
94 resistance [16].

95

96 Remote and pristine microbial communities provide a rich genetic resource to explore the  
97 historical evolutionary origins of naturally occurring antibiotic resistance from the pre-  
98 antibiotic era. Only in few pristine environments with limited anthropogenic influence (e.g.,  
99 permafrost, glaciers, deep sea, and polar regions) can remnants of the above-described  
100 ancient biological warfare mechanisms still be detected. These ARGs and resistant  
101 bacteria evolving in pristine environments may therefore be considered the inherent  
102 antibiotic resistance present in the environment [5].

103

104 We have recently reported the genomic and metabolic adaptations of epilithic biofilms to  
105 windows of opportunities in glacier-fed streams (GFSs) [17]. For example, given the short  
106 flow season during glacial melt, i.e. summer, the incentive to reproduce quickly while  
107 conditions are favourable, is high. During these windows of opportunity, the necessity for  
108 taxa to not only acquire physical niches, but also appropriate resources yields a  
109 competitive environment. Within these biofilms, we observe complex cross-domain

110 interactions between microorganisms to potentially mitigate the harsh nutrient and  
111 environmental conditions of the GFSs. Additionally, owing to their complex biodiversity  
112 [18] and generally oligotrophic conditions [19], epilithic biofilms are ideal model systems  
113 for understanding BGCs and AMR. While oligotrophy may provide the basis for  
114 competition over resources amongst microorganisms such as prokaryotes and (micro-  
115 )eukaryotes. Our previous insights revealed that taxa such as *Polaromonas*,  
116 *Acidobacteria*, and *Methylothenera* have strong interactions with eukaryotes such as algae  
117 and fungi [17]. The inherent diversity allows for understanding the influence of AMR in  
118 microbial interactions. For example, the accidental discovery of penicillin by Alexander  
119 Fleming in 1928 based on bacterial-fungal interactions, [20], has since been expanded  
120 upon by Netzker *et al.* [21]. They reported that microbial interactions lead to the production  
121 of bioactive compounds including antibiotics that may shape the microbial consortia within  
122 a community.

123  
124 Here, to shed light on the role of AMR in shaping microbial communities within (relatively)  
125 pristine environments, we used high-resolution metagenomics to investigate twenty-one  
126 epilithic biofilms from glacier-fed streams. These samples were collected from 8 GFSs  
127 spread across the Southern Alps in New Zealand and the Caucasus in Russia  
128 (Supplementary Table 1). Herein, we found 29 categories of ARGs within the GFSs  
129 across both bacterial and eukaryotic domains. Importantly, most of the AMR was found  
130 in bacteria. We also identified antibacterial BGCs that were encoded both in bacterial and  
131 eukaryotes suggesting extensive intra- and inter-domain competition. Our findings  
132 demonstrate that microorganisms within biofilms from pristine environments not only  
133 encode ARGs, but that they may potentially influence several features of epilithic biofilms

134 such as biofilm formation, community assembly and/or maintenance, including conferring  
135 mechanisms for competitive advantages under extreme conditions.

136

## 137 **Methods**

### 138 **Sampling and biomolecular extractions**

139 Eight GFSs were sampled in early- to mid-2019 from the New Zealand Southern Alps and  
140 the Russian Caucasus, respectively, for a total of 21 epilithic biofilms (Supp. Table 1).

141 The biofilm samples were collected from each stream reach due to biofilms ranging from  
142 abundant to absent, depending on stream geomorphology. One to three biofilm samples  
143 were collected per reach (Supp. Table 1), taken using sterilized metal spatulas to scrape  
144 rocks, followed by their immediate transfer to cryovials. Samples were immediately flash-  
145 frozen in liquid nitrogen and stored at -80 °C until DNA was extracted. DNA from the  
146 epilithic biofilms was extracted using a previously established protocol [22] adapted to a  
147 smaller scale due to relatively high DNA concentrations. DNA quantification was  
148 performed for all samples with the Qubit dsDNA HS kit (Invitrogen).

149

### 150 **Sequencing and data processing for metagenomics**

151 Random shotgun sequencing was performed on all epilithic biofilm DNA samples after  
152 library preparation using the NEBNext Ultra II FS library kit. 50 ng of DNA was  
153 enzymatically fragmented for 12.5 min and libraries were prepared with six PCR  
154 amplification cycles. An average insert of 450 bp was maintained for all libraries. Qubit  
155 was used to quantify the libraries followed by sequencing at the Functional Genomics  
156 Centre Zurich on a NovaSeq (Illumina) using a S4 flowcell. The metagenomic data was

157 processed using the Integrated Meta-omic Pipeline (IMP v3.0; commit# 9672c874  
158 available at <https://git-r3lab.uni.lu/IMP/imp3>) [23]. IMP's workflow includes pre-  
159 processing, contig assembly, genome reconstruction (metagenome-assembled  
160 genomes, i.e. MAGs) and additional functional analysis of genes based on custom  
161 databases in a reproducible manner [23].

162

### 163 **Identification of antimicrobial resistance genes, antibiotic biosynthesis** 164 **pathways and BGCs**

165 For the prediction of ARGs the IMP-generated contigs were used as input for PathoFact  
166 [24]. Identified ARGs were further collapsed into their respective AMR categories in  
167 accordance with the Comprehensive Antibiotic Resistance Database (CARD) [25].  
168 PathoFact uses an HMM-based search to identify homologous sequences across  
169 genomic data, therefore possibly also detecting resistance genes within eukaryotic  
170 genomic fragments. Subsequently, the raw read counts per ORF, obtained from  
171 PathoFact, were determined using FeatureCounts [26].

172

173 To identify pathways for the biosynthesis of antibiotics, we assigned KEGG orthology  
174 (KOs) identifiers to the ORFs using a hidden Markov model [27] (HMM) approach using  
175 *hmmsearch* from HMMER 3.1 [28] with a minimum bit score of 40. Additionally, we linked  
176 the identified KOs to their corresponding KEGG orthology pathways and extracted the  
177 pathways annotated as antibiotic biosynthesis pathways by KEGG. Both the identified  
178 ARGs and KEGG pathways were then further linked to associated bacterial taxonomies.  
179 The bacterial and eukaryotic taxonomies were assigned using the PhyloDB and MMETSP  
180 databases associated with EUKulele (commit# fb8726a; available at

181 <https://github.com/AlexanderLabWHOI/EUKulele>). Consensus taxonomy per contig was  
182 then used for downstream analyses including association with ARGs.

183

184 We further identified BGCs within the MAGs using antiSMASH (ANTIbiotics & Secondary  
185 Metabolite Analysis SHell) [29] and annotated these using deepBGC [30]. To link BGCs  
186 and ARGs, we linked the resistance genes to their associated assembled contigs,  
187 followed by identifying the corresponding bins (MAGs) to which said contigs belonged.

188

## 189 **Data analysis**

190 The relative abundance of the ORFs was calculated based on the RNum\_Gi method  
191 described by Hu *et al.* [31]. Figures for the study, including visualizations derived from the  
192 taxonomic and functional analyses, were created using version 3.6 of the R statistical  
193 software package [32] and using the *tidyverse* package [33]. Alluvial plots were  
194 generated using the *ggalluvial* package [34] while heatmaps were generated using the  
195 *ComplexHeatmap* package [35] developed for R. The corresponding visualization and  
196 analysis code is available at: [https://gitr3lab.uni.lu/laura.denies/Rock\\_Biofilm\\_AMR](https://gitr3lab.uni.lu/laura.denies/Rock_Biofilm_AMR).

197

## 198 **Results**

### 199 **Antimicrobial resistance in a pristine environment**

200 We characterised the resistomes of GFS epilithic biofilms and assessed the distribution  
201 of AMR in twenty-one epilithic biofilm samples, across 8 individual glaciers originating  
202 from the Southern Alps in New-Zealand (SA1, SA2, SA3 and SA4) and the Caucasus in

203 Russia (CU1, CU2, CU3, CU4). In total, we identified a high number (n=1840) of ARGs  
204 within 29 categories of AMR, with similar AMR profiles observed across all GFSs (Fig.  
205 1a, Supp. Fig. 1), except for SA2 and SA3 where the differences were driven by elevated  
206 fluoroquinolone, glycopeptide and phenicol resistance, respectively. It is to be noted that  
207 while ARGs refer to the genes encoding specific resistance, AMR categories derived from  
208 metagenomic data in this context, typically reflect the functional potential associated with  
209 respect to the resistance encoded. Of the identified AMR categories, beta-lactam and  
210 multidrug resistance (i.e. resistance conferring protection against multiple antibiotic  
211 classes), followed by aminoglycoside resistance, were found to be highly abundant in all  
212 samples. We subsequently analysed the diversity of ARGs within the various resistance  
213 categories and found beta-lactam resistance to represent the largest resistance category,  
214 contributing 930 unique ARGs to the resistome. This was followed by multidrug (179  
215 ARGs) and aminoglycoside (176 ARGs) resistance (Supp. Table 2). In contrast, some  
216 resistance categories such as polymyxin and pleuromutilin resistance were only detected  
217 at very low levels within the epilithic biofilm resistomes.

218  
219 We further investigated the contribution of microbial populations to the resistome and  
220 found contributions from both prokaryotes and eukaryotes (Fig. 1b). Prokaryotes within  
221 this study refer to bacteria alone, since archaea encoded for an infinitesimal number of  
222 ARGs (<0.000001% RNum\_GI; *Methods*), and therefore were excluded from further  
223 analyses. Among the eukaryotes, the phylum Ochrophyta (algae) was the dominant  
224 contributor and encoded most of the AMR categories (Fig. 1c, Supp. Fig. 2a). In bacteria,  
225 AMR was more evenly distributed with most of the phyla encoding ARGs across all  
226 categories (Fig. 1c). However, members of the Alphaproteobacteria, Betaproteobacteria,

227 and the Bacteroidetes/Chlorobi group encoded the highest overall ARG abundance (Fig.  
228 1c, Supp. Fig. 2b). Additionally, AMR categories such as aminoglycoside, beta-lactam,  
229 glycopeptide and rifamycin resistance (among others) were widely distributed in both  
230 bacteria as well as among the eukaryotes. On the other hand, categories such as  
231 aminocoumarin, bacitracin, and diaminopyrimidine resistance were found to be primarily  
232 encoded by bacteria.

233

### 234 **Antibiotic biosynthesis pathways and biosynthetic gene clusters**

235 As described above, beta-lactam, multidrug and aminoglycoside resistance were the  
236 most abundant resistance categories within GFS epilithic biofilms. This was not surprising  
237 as beta-lactams and aminoglycosides are natural and prevalent compounds [36,37].  
238 Furthermore, multidrug resistance is typically conferred via efflux machineries which were  
239 also common in the GFS epilithic biofilms. These typically serve dual purposes in  
240 particular for protein export within most bacteria [38]. Based on these results, it is  
241 therefore highly likely that pristine environments such as GFSs potentially reflect the  
242 spectrum of natural antibiotics and their resistance mechanisms, reinforcing their capacity  
243 to serve as natural baselines for assessing enrichments and spread of AMR.

244

245 To further understand if these encoded resistance genes reflected natural antibiotic  
246 pressure, we investigated pathways associated with antibiotic biosynthesis using the  
247 KEGG database [39]. In total, we identified seven different pathways corresponding to  
248 the biosynthesis of macrolides (MLS), ansamycins, glycopeptides (vancomycin), beta-  
249 lactams (monobactam, penicillin and cephalosporin), aminoglycosides (streptomycin),

250 and tetracyclines, which were present in various abundances in all samples (Supp. Fig.  
251 3a). Importantly, the identified antibiotic synthesis genes thereby corresponded to the  
252 resistance categories identified within the epilithic biofilms. Interestingly, in most of the  
253 GFSs, antibiotic biosynthesis was primarily encoded by bacteria spanning multiple phyla  
254 (Supp. Fig. 3b, Supp. Fig. 3c). Exceptions to these were GL11 and GL15 in which  
255 biosynthesis pathways were equally distributed among eukaryotes, specifically  
256 Ochrophyta, in addition to bacteria.

257  
258 To further validate our observations, we assessed the abundance of BGCs, which are  
259 known to encode genes for secondary metabolite synthesis, including antibiotics. We  
260 found six different structural classes of BGCs by annotating 537 medium-to-high quality  
261 (>50% completion and <10% contamination) bacterial and 30 eukaryotic MAGs using  
262 antiSmash [29] and DeepBGC [30]. Using this ensemble approach we identified one or  
263 more BGCs in most bacterial (n=490, ~91% of all bacterial MAGs) and eukaryotic (n=28)  
264 MAGs. Of these BGCs, those annotated with an antibacterial function were dominant  
265 across the microbial populations, represented here by the MAGs, and were found across  
266 all phyla (Fig. 2a). Overall, a wider variety of BGCs associated with cytotoxic activity,  
267 inhibitory, and antifungal mechanisms were also identified in bacteria. Eukaryotes, on the  
268 other hand, encoded a high prevalence of antibacterial BGCs (~93% of all eukaryotic  
269 MAGs) (Fig. 2a). We further annotated those BGCs identified as antibacterial to  
270 determine their subtypes and found that most of them were 'unknown' (Fig. 2b). However,  
271 other identified subtypes include ribosomally synthesized and post-translationally  
272 modified peptides (RiPPs) such as bacteriocins, along with NRPs, PKs, and terpenes.

273



274 According to the resistance hypothesis [14], within or close to, each BGC there is at least  
275 one gene conferring resistance to its encoded secondary metabolite. To test this, we  
276 assessed whether the MAGs encoding a BGC also encoded corresponding ARGs. In line  
277 with this hypothesis, we identified BGCs and their respective resistance genes in close  
278 proximity to each other through their localization on the same contig. Consequently, we  
279 identified various BGCs encoded together with ARGs in both the bacterial and eukaryotic  
280 MAGs. For example, we found that an antibacterial BGC was encoded by *Flavobacterium*  
281 spp. on the same contig as both MLS (macrolides, lincosamides and streptogramin) and  
282 beta-lactam resistance genes (Fig. 2c). Incidentally, we also found that a candidate phyla  
283 radiation (CPR) bacterium (Aalborg-AAW-1; phylum Patescibacteria) also encoded both  
284 antibacterial BGC and MLS resistance on the same contig.

285

## 286 Discussion

287 Microbial reservoirs in pristine environments, with little to no impact from anthropogenic  
288 selection pressures, provide the opportunity to investigate the natural propensity and  
289 linked evolutionary origins of AMR. Here, by leveraging high-resolution metagenomics on  
290 twenty-one epilithic biofilms, we assessed the resistomes of eight individual GFS epilithic  
291 biofilms.

292

293 To date, while many studies have looked for novel antibiotics and resistance genes in  
294 pristine environments such as the deep sea [40] or the polar regions [41], few have  
295 explored the full diversity of antibiotic resistance in such environments [42,43]. Van  
296 Goethem *et al.* [44] identified 117 naturally occurring ARGs associated with multidrug,

297 aminoglycoside and beta-lactam resistance in pristine Antarctic soils. Similarly, D'Costa  
298 *et al.* [4] identified a collection of ARGs encoding resistance to beta-lactams as well as  
299 tetracyclines and glycopeptides in 30,000-year-old Beringian permafrost sediments. In  
300 agreement with these previous studies, we identified 29 AMR categories, including the  
301 previously mentioned resistance categories, in the studied biofilm communities. Among  
302 these, the highest ARG abundance was associated with aminoglycoside and beta-lactam  
303 resistance. Our study further suggests that although the overall abundance differs, the  
304 epilithic resistome was highly similar in all GFSs, independent of origin (i.e. New Zealand  
305 or Russia). Furthermore, our results agree with the results obtained in other resistomes  
306 identified in pristine environments such as Antarctic soils and permafrost in terms of the  
307 identified ARGs. Unlike previous studies, where ARGs were primarily associated with  
308 bacteria, we report for the first time that AMR was associated with both bacteria and  
309 eukaryotes in various abundances in environmental samples including GFSs. A previous  
310 study by Brown *et al.* [45] reported that the IRS-HR (isoleucyl-tRNA synthetase - high  
311 resistance) type gene conferring resistance against mupirocin was identified in  
312 *Staphylococcus aureus*. More importantly, they suggested that horizontal gene transfer  
313 led to the acquisition of IRS-HR genes by bacteria from eukaryotes [45]. Despite these  
314 early reports, the contribution of eukaryotes to most resistomes, including from pristine  
315 environments, has largely been unexplored thus far. An exception to this was the report  
316 by Fairlamb *et al.* [46] who identified eukaryotic drug resistance, especially encoded by  
317 fungi (*Candida* and *Aspergillus*) and parasites (*Plasmodium* and *Trypanosoma*).  
318 However, most of these modes of resistance were highly specific towards particular drug  
319 treatments [46]. Our results specifically revealed that taxa from the phylum Ochrophyta

320 encoded resistance to 28 AMR categories and this was also reflected in other (micro-  
321 )eukaryotes.

322

323 Apart from encoded resistance mechanisms, microalgae such as Ochrophyta have been  
324 of interest as a source of (new) antimicrobial compounds [47,48]. In line with this, Martins  
325 *et al.* suggested that extracts from different microalgae may potentially serve not only as  
326 antimicrobial agents, but also as anti-cancer therapeutics. However, our present results  
327 suggest that these taxa may also serve as environmental reservoirs for AMR itself. It is  
328 however presently unclear whether this phenomenon confers advantages with respect to  
329 niche occupation and protection against bacterial infection as well as whether the  
330 eukaryotes are sensitive to the antibiotics produced by them.

331

332 Studies delving into the origins of AMR have reported that fecal pollution may explain  
333 ARG abundances in anthropogenically impacted environments [49]. This phenomenon  
334 was also observed by Antelo *et al.* [50] and others [51] who detected ARGs in soils in  
335 Antarctica, especially in proximity to scientific bases. Although it is plausible that some of  
336 the GFSs sampled in our study may indeed be under anthropogenic influence, in pristine  
337 environments, AMR is most likely derived from natural antibiotics produced by  
338 microorganisms as a competitive advantage. Microorganisms acquire resistance either  
339 as a protective measure against other microorganisms [52,53] or as a self-defense  
340 mechanism to prevent inadvertent suicide by damaging metabolites [14]. Accordingly, we  
341 found both antibiotic biosynthesis pathways and BGCs within the epilithic resistomes. We  
342 identified pathways for the biosynthesis of glycopeptides, beta-lactams, and  
343 aminoglycosides, among others, concurrent with the high abundance of ARGs against

344 said antibiotics. Additionally, we identified BGCs with a predicted antibacterial function in  
345 both eukaryotes and bacteria. While a limited number of studies such as Waschulin *et al.*  
346 [54] and Liao *et al.* [55], have shown BGCs in pristine environments, none of these studies  
347 have contextualized the co-occurrence of BGCs with AMR. Hence, we not only found that  
348 most of our MAGs contain BGCs, of which many have an antibacterial function, but also  
349 found all MAGs to encode multiple resistance genes. Additionally, we found several BGCs  
350 closely localized to ARGs on the same contig, thereby indicating an immediate self-  
351 defense mechanism against the encoded secondary metabolites. This agrees with the  
352 resistance hypothesis highlighted by Tran *et al.* stating that a gene conferring resistance  
353 to potentially harmful metabolites produced by the organism are to be found within the  
354 BGC-encoding operons [14]. We also observed that the recently identified CPR bacteria  
355 [56] (in our case, phylum Patescibacteria) not only encoded for AMR but also harboured  
356 genes associated with the production of molecules with antibacterial effects. Although  
357 Patescibacteria have been identified in oligotrophic environments [57,58] with carbon  
358 and/or nutrient limitations similar to those observed for GFSs, it is plausible that their  
359 ability to survive with minimal biosynthetic and metabolic pathways may indeed depend  
360 on the expression of BGCs and AMR. At the time of writing, a preprint by Maatouk *et al.*  
361 [59], described the presence of ARGs across publicly available CPR bacterial genomes.  
362 In addition, we report the identification of AMR within GFS-derived CPR genomes, likely  
363 as a means of competitive inhibition against other taxa. Alternatively, biofilms may also  
364 allow for collective resistance, tolerance, and exposure protection to antibacterial  
365 compounds [60]. The AMR and BGCs encoded by most phyla may therefore affect  
366 cooperation and/or interactions associated with nutrient exchange, leading to the  
367 privatization of public goods [60]. Such a phenomenon may be achieved due to the

368 competition within taxa, both at the intra- and inter-species levels, via secretion of toxins  
369 [53] and occupying spatial niches [61,62] thereafter. Furthermore, Stubbendieck and  
370 Straight previously highlighted the multifaceted effects of bacterial competition which  
371 include the potential taxation and subsequent increase in bacterial fitness [63]. Thus, the  
372 *in-situ* competition within multi-species biofilms may allow for cross-phyla and cross-  
373 domain interactions whilst simultaneously increasing the overall fitness of the  
374 endogenous epilithic microbial community. Alternatively, these interactions or lack thereof  
375 may shape the overall community including spatial organisation [64], especially in energy  
376 limited systems such as the GFSs.

377

## 378 **Conclusions**

379 Epilithic biofilms are an integral and key mode of survival in extreme environments such  
380 as glacier-fed stream ecosystems. Herein, we report that these biofilms provide critical  
381 insights into the naturally occurring resistome. Our findings demonstrate that intra- and  
382 inter-domain competition and survival mechanisms shed light on the ecological dimension  
383 of microbial communities. Furthermore, we reveal the congruence of genes encoding for  
384 both BGCs and AMR, in both bacteria and eukaryotes. More importantly, we highlight for  
385 the first time the comprehensive AMR profile of CPR bacteria and of (micro-)eukaryotes.  
386 Collectively, our results highlight underlying resistance mechanisms, including BGCs,  
387 employed in 'biological warfare' in oligotrophic and challenging glacier-fed stream  
388 ecosystems.

389

## 390 **List of Abbreviations**

- 391 AMR: Antimicrobial resistance
- 392 ARGs: Antimicrobial resistance gene(s)
- 393 BGC: Biosynthetic gene clusters
- 394 CA: Caucasus
- 395 CPR: Candidate Phyla radiation
- 396 GFSs: Glacier-fed stream(s)
- 397 GL: Glacier
- 398 IRS-RS: isoleucyl-tRNA synthetase - high resistance
- 399 IMP: Integrate Meta-Omics Pipeline
- 400 KEGG: Kyoto Encyclopedia of Genes and Genomes
- 401 MAGs: Metagenome-assembled genome(s)
- 402 NRPS: Non-ribosomal peptide synthetases
- 403 PKS: Polyketide synthases (type I and type II)
- 404 RiPPs: Post-translationally modified peptide(s)
- 405 SA: Southern Alps
- 406

## 407 **Declarations**

- 408 Ethics approval and consent to participate
- 409 Not applicable
- 410 Consent for publication
- 411 Not applicable

## 412 **Availability of data and material**

413 The Biosample accession IDs listed under Supp. Table 3 can be found on NCBI under  
414 the BioProject accession# **PRJNA733707**. The analyses code for IMP and downstream  
415 analyses is detailed at [https://git-r3lab.uni.lu/susheel.busi/nomis\\_pipeline](https://git-r3lab.uni.lu/susheel.busi/nomis_pipeline). Binning and  
416 manual refinement of eukaryotic MAGs was done as described here: [https://git-  
417 r3lab.uni.lu/susheel.busi/nomis\\_pipeline/-  
418 /blob/master/workflow/notes/MiscEUKMAGs.md](https://git-r3lab.uni.lu/susheel.busi/nomis_pipeline/-/blob/master/workflow/notes/MiscEUKMAGs.md). All visualization and analysis code is  
419 available at: [https://git-r3lab.uni.lu/laura.denies/Rock\\_Biofilm\\_AMR](https://git-r3lab.uni.lu/laura.denies/Rock_Biofilm_AMR).

## 420 **Competing interests**

421 The authors declare that they have no competing interests

## 422 **Funding**

423 This research has been supported by The NOMIS Foundation to TJB and the Swiss  
424 National Science Foundation (CRSII5\_180241) supporting SBB. LdN and PW are  
425 supported by the Luxembourg National Research Fund (FNR; PRIDE17/11823097)  
426 awarded to PW.

## 427 **Authors' contributions**

428 SBB, LdN, PW, and TJB conceived the project. PP extracted DNA, SBB and PP prepared  
429 the metagenomic libraries for sequencing. SBB and LdN conceptualized and performed  
430 the data analyses. SBB and LdN wrote the manuscript with PW and TJB, with significant  
431 input and editing from all coauthors.

## 432 **Acknowledgements**

433 We gratefully acknowledge the laboratory support from Emmy Marie Oppliger at EPFL  
434 and Lea Grandmougin, Janine Habier, Laura Lebrun at the University of Luxembourg.  
435 We also acknowledge the key input from Rashi Halder at the LCSB Sequencing Platform  
436 regarding library preparation. We thank Patrick May and Cedric Christian Laczny for the  
437 crucial insights into metagenomic processing. The computational analyses were  
438 performed at the HPC facilities at the University of Luxembourg (<https://hpc.uni.lu>) [65].

439

## 440 **Figure legends**

### 441 **Figure 1. Epilithic biofilms in GFSs harbour a diverse resistome**

442 (a) Relative abundance of 29 AMR categories within 21 epilithic biofilms collected from  
443 four New Zealand Southern Alps (SA) and four Russian Caucasus (CU) GFSs. (b) Bar  
444 plots depicting the relative abundance of bacteria and eukaryotes encoding ARGs. (c)  
445 Phylum-level representation of the AMR abundances across bacteria and eukaryotes.  
446 Size of the closed circle indicates the normalised relative abundance (Rnum\_Gi; see  
447 *Methods*), whereby the color represents individual phyla.

448

### 449 **Figure 2. Biosynthetic gene clusters indicate the resistome potential**

450 (a) Heatmap depicting the overall abundance of BGCs identified across bacterial and  
451 eukaryotic MAGs. The respective phyla are listed on the left while the coloured legend  
452 represents the taxonomic order. (b) In-depth characterisation of the ‘antibacterial’ BGCs  
453 found within all phyla and orders across medium-to-high quality MAGs. (c) Alluvial plots



454 depicting the taxa where both BGCs and AMR were found adjacently on the same contig.  
455 Colours indicate the genera associated with the MAGs.

456

457 **Supplementary figure 1. Ordination analyses reveal the (dis)similarity of the GFS**  
458 **resistomes**

459 (a) Principal component analyses depicting the overall similarity of the individual GFS  
460 resistomes. Each dot represents the resistome predicted from a single metagenome. SA:  
461 Southern Alps. CU: Caucasus. (b) Biplot demonstrating the underlying factors, i.e. ARG  
462 abundances across 29 AMR categories, driving the similarity within the GFS epilithic  
463 resistomes.

464

465 **Supplementary figure 2. Bacterial and eukaryotic phyla encode AMR**

466 (a) Relative abundance of the bacteria associated with AMR. The stacked bar plots are  
467 faceted by the individual GFSs where the epilithic biofilms were collected. The colors  
468 represent the individual phyla. (b) Stacked bar plots indicating the relative abundance of  
469 the AMR encoded by eukaryotes.

470

471 **Supplementary figure 3. Antibiotic synthesis pathway assessment via KEGG**  
472 **orthology**

473 (a) Relative abundance of KEGG pathways associated with antibiotic synthesis across  
474 the 21 epilithic biofilms. (b) Bar plots indicating the relative abundance of the antibiotic  
475 associated KEGG pathways mediated by bacteria and eukaryotes. (c) Normalised relative  
476 abundance of pathways associated with antibiotic production in the KEGG database,  
477 juxtaposed with the various phyla encoding these genes.

478

## 479 **Supplementary data**

480 **Supplementary table 1. Sample metadata**

481 **Supplementary table 2. List of ARGs identified across 21 GFS epilithic biofilms**

482 **Supplementary table 3. NCBI accession metadata**

483

## 484 **References**

- 485 1. Stanton IC, Bethel A, Leonard AFC, Gaze WH, Garside R. What is the research evidence  
486 for antibiotic resistance exposure and transmission to humans from the environment? A  
487 systematic map protocol. *Environ Evid.* 2020;9: 12.
- 488 2. Balasegaram M. Learning from COVID-19 to Tackle Antibiotic Resistance. *ACS Infect Dis.*  
489 2021;7: 693–694.
- 490 3. Wright GD. The antibiotic resistome: the nexus of chemical and genetic diversity. *Nat Rev*  
491 *Microbiol.* 2007;5: 175–186.
- 492 4. D'Costa VM, King CE, Kalan L, Morar M, Sung WWL, Schwarz C, et al. Antibiotic  
493 resistance is ancient. *Nature.* 2011;477: 457–461.
- 494 5. Scott LC, Lee N, Aw TG. Antibiotic Resistance in Minimally Human-Impacted  
495 Environments. *Int J Environ Res Public Health.* 2020;17. doi:10.3390/ijerph17113939
- 496 6. Tyc O, Song C, Dickschat JS, Vos M, Garbeva P. The Ecological Role of Volatile and  
497 Soluble Secondary Metabolites Produced by Soil Bacteria. *Trends Microbiol.* 2017;25: 280–  
498 292.
- 499 7. Chen R, Wong HL, Kindler GS, MacLeod FI, Benaud N, Ferrari BC, et al. Discovery of an

- 500 Abundance of Biosynthetic Gene Clusters in Shark Bay Microbial Mats. *Front Microbiol.*  
501 2020;11: 1950.
- 502 8. Demain AL, Fang A. The Natural Functions of Secondary Metabolites. In: Fiechter A, editor.  
503 History of Modern Biotechnology I. Berlin, Heidelberg: Springer Berlin Heidelberg; 2000. pp.  
504 1–39.
- 505 9. Newman DJ, Cragg GM. Natural Products as Sources of New Drugs from 1981 to 2014. *J*  
506 *Nat Prod.* 2016;79: 629–661.
- 507 10. Medema MH, Kottmann R, Yilmaz P, Cummings M, Biggins JB, Blin K, et al. Minimum  
508 Information about a Biosynthetic Gene cluster. *Nat Chem Biol.* 2015;11: 625–631.
- 509 11. Martinet L, Naômé A, Deflandre B, Maciejewska M, Tellatin D, Tenconi E, et al. A Single  
510 Biosynthetic Gene Cluster Is Responsible for the Production of Bagremycin Antibiotics and  
511 Ferroverdin Iron Chelators. *MBio.* 2019;10. doi:10.1128/mBio.01230-19
- 512 12. Martínez-Núñez MA, López VEL y. Nonribosomal peptides synthetases and their  
513 applications in industry. *Sustainable Chemical Processes.* 2016;4: 1–8.
- 514 13. Ridley CP, Lee HY, Khosla C. Evolution of polyketide synthases in bacteria. *Proc Natl Acad*  
515 *Sci U S A.* 2008;105: 4595–4600.
- 516 14. Tran PN, Yen M-R, Chiang C-Y, Lin H-C, Chen P-Y. Detecting and prioritizing biosynthetic  
517 gene clusters for bioactive compounds in bacteria and fungi. *Appl Microbiol Biotechnol.*  
518 2019;103: 3277–3287.
- 519 15. Cundliffe E, Bate N, Butler A, Fish S, Gandeche A, Merson-Davies L. The tylosin-  
520 biosynthetic genes of *Streptomyces fradiae*. *Antonie Van Leeuwenhoek.* 2001;79: 229–234.
- 521 16. Kwun MJ, Hong H-J. Genome Sequence of *Streptomyces toyocaensis* NRRL 15009,  
522 Producer of the Glycopeptide Antibiotic A47934. *Genome Announc.* 2014;2.

523 doi:10.1128/genomeA.00749-14

- 524 17. Busi SB, Bourquin M, Fodelianakis S, Michoud G, Kohler TJ, Peter H, et al. Genomic and  
525 metabolic adaptations of biofilms to ecological windows of opportunities in glacier-fed  
526 streams. *bioRxiv*. 2021. p. 2021.10.07.463499. doi:10.1101/2021.10.07.463499
- 527 18. Battin TJ, Besemer K, Bengtsson MM, Romani AM, Packmann AI. The ecology and  
528 biogeochemistry of stream biofilms. *Nat Rev Microbiol*. 2016;14: 251–263.
- 529 19. Battin TJ, Wille A, Sattler B, Psenner R. Phylogenetic and functional heterogeneity of  
530 sediment biofilms along environmental gradients in a glacial stream. *Appl Environ Microbiol*.  
531 2001;67: 799–807.
- 532 20. Gaynes R. The Discovery of Penicillin—New Insights After More Than 75 Years of Clinical  
533 Use. *Emerg Infect Dis*. 2017;23: 849.
- 534 21. Netzker T, Flak M, Krespach MK, Stroe MC, Weber J, Schroeckh V, et al. Microbial  
535 interactions trigger the production of antibiotics. *Curr Opin Microbiol*. 2018;45: 117–123.
- 536 22. Busi SB, Pramateftaki P, Brandani J, Fodelianakis S, Peter H, Halder R, et al. Optimised  
537 biomolecular extraction for metagenomic analysis of microbial biofilms from high-mountain  
538 streams. *PeerJ*. 2020;8: e9973.
- 539 23. Narayanasamy S, Jarosz Y, Muller EEL, Heintz-Buschart A, Herold M, Kaysen A, et al.  
540 IMP: a pipeline for reproducible reference-independent integrated metagenomic and  
541 metatranscriptomic analyses. *Genome Biol*. 2016;17: 260.
- 542 24. de Nies L, Lopes S, Busi SB, Galata V, Heintz-Buschart A, Laczny CC, et al. PathoFact: a  
543 pipeline for the prediction of virulence factors and antimicrobial resistance genes in  
544 metagenomic data. *Microbiome*. 2021;9: 49.
- 545 25. Alcock BP, Raphenya AR, Lau TTY, Tsang KK, Bouchard M, Edalatmand A, et al. CARD

- 546           2020: antibiotic resistome surveillance with the comprehensive antibiotic resistance  
547           database. *Nucleic Acids Res.* 2020;48: D517–D525.
- 548   26. Liao Y, Smyth GK, Shi W. featureCounts: An efficient general-purpose program for  
549           assigning sequence reads to genomic features. *arXiv [q-bio.GN]*. 2013. Available:  
550           <http://arxiv.org/abs/1305.3347>
- 551   27. Yoon B-J. Hidden Markov Models and their Applications in Biological Sequence Analysis.  
552           *Curr Genomics.* 2009;10: 402–415.
- 553   28. Eddy SR. Accelerated Profile HMM Searches. *PLoS Comput Biol.* 2011;7: e1002195.
- 554   29. Blin K, Shaw S, Kloosterman AM, Charlop-Powers Z, van Wezel GP, Medema MH, et al.  
555           antiSMASH 6.0: improving cluster detection and comparison capabilities. *Nucleic Acids*  
556           *Res.* 2021;49: W29–W35.
- 557   30. Hannigan GD, Pihoda D, Palicka A, Soukup J, Klempir O, Rampula L, et al. A deep  
558           learning genome-mining strategy for biosynthetic gene cluster prediction. *Nucleic Acids*  
559           *Res.* 2019;47: e110.
- 560   31. Hu Y, Yang X, Qin J, Lu N, Cheng G, Wu N, et al. Metagenome-wide analysis of antibiotic  
561           resistance genes in a large cohort of human gut microbiota. *Nat Commun.* 2013;4: 2151.
- 562   32. Computing R, Others. R: A language and environment for statistical computing. Vienna: R  
563           Core Team. 2013. Available: [https://www.yumpu.com/en/document/view/6853895/r-a-](https://www.yumpu.com/en/document/view/6853895/r-a-language-and-environment-for-statistical-computing)  
564           [language-and-environment-for-statistical-computing](https://www.yumpu.com/en/document/view/6853895/r-a-language-and-environment-for-statistical-computing)
- 565   33. Wickham H, Averick M, Bryan J, Chang W, McGowan L, François R, et al. Welcome to the  
566           tidyverse. *J Open Source Softw.* 2019;4: 1686.
- 567   34. Brunson J. ggalluvial: Layered Grammar for Alluvial Plots. *J Open Source Softw.* 2020;5:  
568           2017.

- 569 35. Gu Z, Eils R, Schlesner M. Complex heatmaps reveal patterns and correlations in  
570 multidimensional genomic data. *Bioinformatics*. 2016;32: 2847–2849.
- 571 36. Krause KM, Serio AW, Kane TR, Connolly LE. Aminoglycosides: An Overview. *Cold Spring*  
572 *Harb Perspect Med*. 2016;6. doi:10.1101/cshperspect.a027029
- 573 37. Tahlan K, Jensen SE. Origins of the  $\beta$ -lactam rings in natural products. *J Antibiot* . 2013;66:  
574 401–410.
- 575 38. Borges-Walmsley MI, McKeegan KS, Walmsley AR. Structure and function of efflux pumps  
576 that confer resistance to drugs. *Biochem J*. 2003;376: 313–338.
- 577 39. Kanehisa M, Goto S. KEGG: Kyoto Encyclopedia of Genes and Genomes. *Nucleic Acids*  
578 *Res*. 2000;28: 27–30.
- 579 40. Tortorella E, Tedesco P, Palma Esposito F, January GG, Fani R, Jaspars M, et al.  
580 *Antibiotics from Deep-Sea Microorganisms: Current Discoveries and Perspectives*. *Mar*  
581 *Drugs*. 2018;16. doi:10.3390/md16100355
- 582 41. McCann CM, Christgen B, Roberts JA, Su J-Q, Arnold KE, Gray ND, et al. Understanding  
583 drivers of antibiotic resistance genes in High Arctic soil ecosystems. *Environ Int*. 2019;125:  
584 497–504.
- 585 42. Yuan K, Yu K, Yang R, Zhang Q, Yang Y, Chen E, et al. Metagenomic characterization of  
586 antibiotic resistance genes in Antarctic soils. *Ecotoxicol Environ Saf*. 2019;176: 300–308.
- 587 43. Centurion VB, Delforno TP, Lacerda-Júnior GV, Duarte AWF, Silva LJ, Bellini GB, et al.  
588 Unveiling resistome profiles in the sediments of an Antarctic volcanic island. *Environ Pollut*.  
589 2019;255: 113240.
- 590 44. Van Goethem MW, Pierneef R, Bezuidt OKI, Van De Peer Y, Cowan DA, Makhalanyane  
591 TP. A reservoir of “historical” antibiotic resistance genes in remote pristine Antarctic soils.

- 592 Microbiome. 2018;6: 40.
- 593 45. Brown JR, Zhang J, Hodgson JE. A bacterial antibiotic resistance gene with eukaryotic  
594 origins. *Curr Biol.* 1998;8: R365–7.
- 595 46. Fairlamb AH, Gow NAR, Matthews KR, Waters AP. Drug resistance in eukaryotic  
596 microorganisms. *Nat Microbiol.* 2016;1: 16092.
- 597 47. Silva A, Silva SA, Carpena M, Garcia-Oliveira P, Gullón P, Barroso MF, et al. Macroalgae  
598 as a Source of Valuable Antimicrobial Compounds: Extraction and Applications. *Antibiotics*  
599 (Basel). 2020;9. doi:10.3390/antibiotics9100642
- 600 48. Martins RM, Nedel F, Guimarães VBS, da Silva AF, Colepicolo P, de Pereira CMP, et al.  
601 Macroalgae Extracts From Antarctica Have Antimicrobial and Anticancer Potential. *Front*  
602 *Microbiol.* 2018;9: 412.
- 603 49. Karkman A, Pärnänen K, Larsson DGJ. Fecal pollution can explain antibiotic resistance  
604 gene abundances in anthropogenically impacted environments. *Nat Commun.* 2019;10: 80.
- 605 50. Antelo V, Giménez M, Azziz G, Valdespino-Castillo P, Falcón LI, Ruberto LAM, et al.  
606 Metagenomic strategies identify diverse integron-integrase and antibiotic resistance genes  
607 in the Antarctic environment. *Microbiologyopen.* 2021;10. doi:10.1002/mbo3.1219
- 608 51. Hernández F, Calisto-Ulloa N, Gómez-Fuentes C, Gómez M, Ferrer J, González-Rocha G,  
609 et al. Occurrence of antibiotics and bacterial resistance in wastewater and sea water from  
610 the Antarctic. *J Hazard Mater.* 2019;363: 447–456.
- 611 52. Reygaert WC. An overview of the antimicrobial resistance mechanisms of bacteria. *AIMS*  
612 *Microbiol.* 2018;4: 482–501.
- 613 53. Granato ET, Meiller-Legrand TA, Foster KR. The Evolution and Ecology of Bacterial  
614 Warfare. *Curr Biol.* 2019;29: R521–R537.

- 615 54. Waschulin V, Borsetto C, James R, Newsham KK, Donadio S, Corre C, et al. Biosynthetic  
616 potential of uncultured Antarctic soil bacteria revealed through long-read metagenomic  
617 sequencing. *ISME J.* 2021. doi:10.1038/s41396-021-01052-3
- 618 55. Liao L, Su S, Zhao B, Fan C, Zhang J, Li H, et al. Biosynthetic Potential of a Novel Antarctic  
619 Actinobacterium *Marisediminicola antarctica* ZS314T Revealed by Genomic Data Mining  
620 and Pigment Characterization. *Mar Drugs.* 2019;17. doi:10.3390/md17070388
- 621 56. Hug LA, Baker BJ, Anantharaman K, Brown CT, Probst AJ, Castelle CJ, et al. A new view  
622 of the tree of life. *Nat Microbiol.* 2016;1: 16048.
- 623 57. Tian R, Ning D, He Z, Zhang P, Spencer SJ, Gao S, et al. Small and mighty: adaptation of  
624 superphylum Patescibacteria to groundwater environment drives their genome simplicity.  
625 *Microbiome.* 2020;8: 51.
- 626 58. Vigneron A, Cruaud P, Langlois V, Lovejoy C, Culley AI, Vincent WF. Ultra-small and  
627 abundant: Candidate phyla radiation bacteria are potential catalysts of carbon  
628 transformation in a thermokarst lake ecosystem. *Limnol Oceanogr Lett.* 2020;5: 212–220.
- 629 59. Maatouk M, Ibrahim A, Rolain J-M, Merhej V, Bittar F. Small and equipped: the rich  
630 repertoire of antibiotic resistance genes in Candidate Phyla Radiation genomes. *bioRxiv.*  
631 2021. p. 2021.07.02.450847. doi:10.1101/2021.07.02.450847
- 632 60. Bottery MJ, Pitchford JW, Friman V-P. Ecology and evolution of antimicrobial resistance in  
633 bacterial communities. *ISME J.* 2021;15: 939–948.
- 634 61. Bottery MJ, Passaris I, Dytham C, Wood AJ, van der Woude MW. Spatial Organization of  
635 Expanding Bacterial Colonies Is Affected by Contact-Dependent Growth Inhibition. *Curr*  
636 *Biol.* 2019;29: 3622–3634.e5.
- 637 62. Schluter J, Nadell CD, Bassler BL, Foster KR. Adhesion as a weapon in microbial



- 638 competition. ISME J. 2015;9: 139–149.
- 639 63. Stubbendieck RM, Straight PD. Multifaceted Interfaces of Bacterial Competition. J  
640 Bacteriol. 2016;198: 2145–2155.
- 641 64. Estrela S, Brown SP. Community interactions and spatial structure shape selection on  
642 antibiotic resistant lineages. PLoS Comput Biol. 2018;14: e1006179.
- 643 65. Varrette S, Bouvry P, Cartiaux H, Georgatos F. Management of an academic HPC cluster:  
644 The UL experience. 2014 International Conference on High Performance Computing  
645 Simulation (HPCS). 2014. pp. 959–967.

Figure 1

a

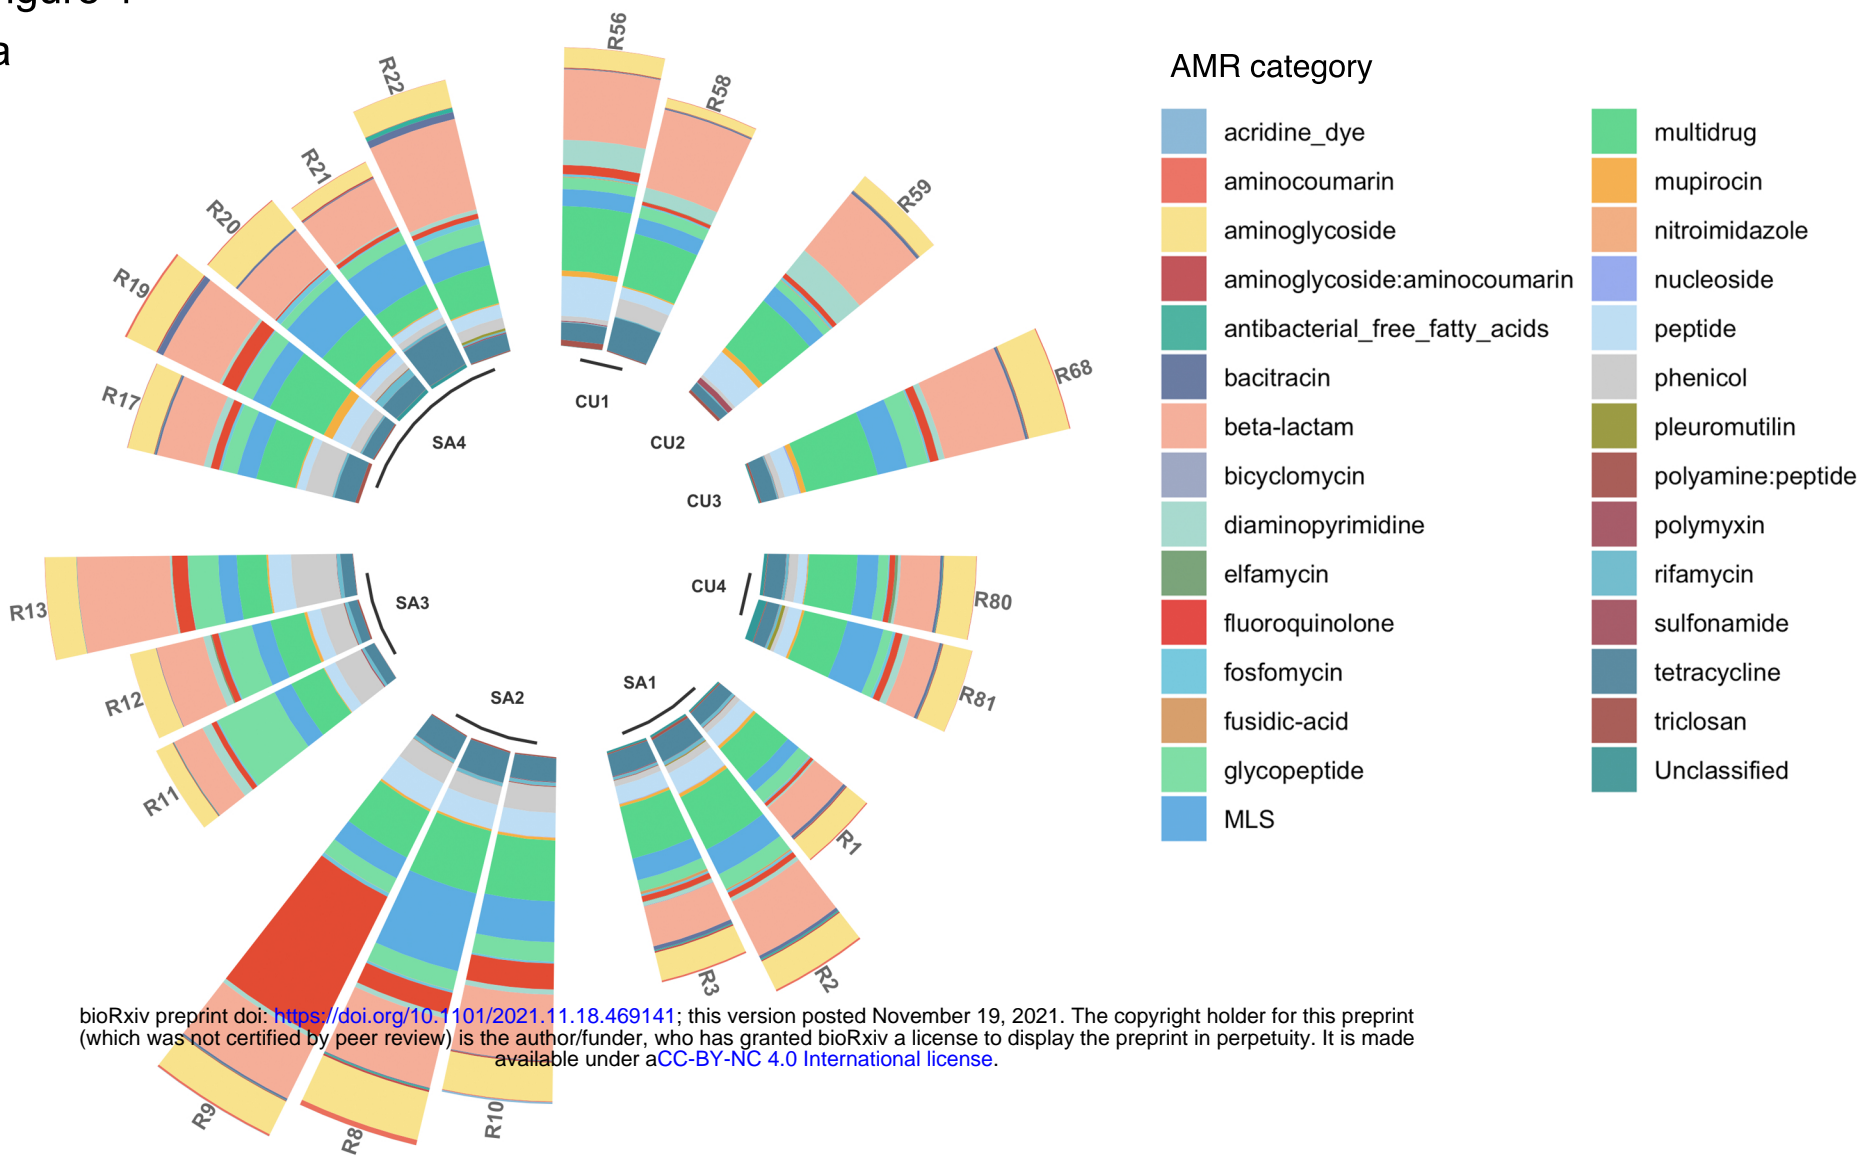

bioRxiv preprint doi: <https://doi.org/10.1101/2021.11.18.469141>; this version posted November 19, 2021. The copyright holder for this preprint (which was not certified by peer review) is the author/funder, who has granted bioRxiv a license to display the preprint in perpetuity. It is made available under aCC-BY-NC 4.0 International license.

b

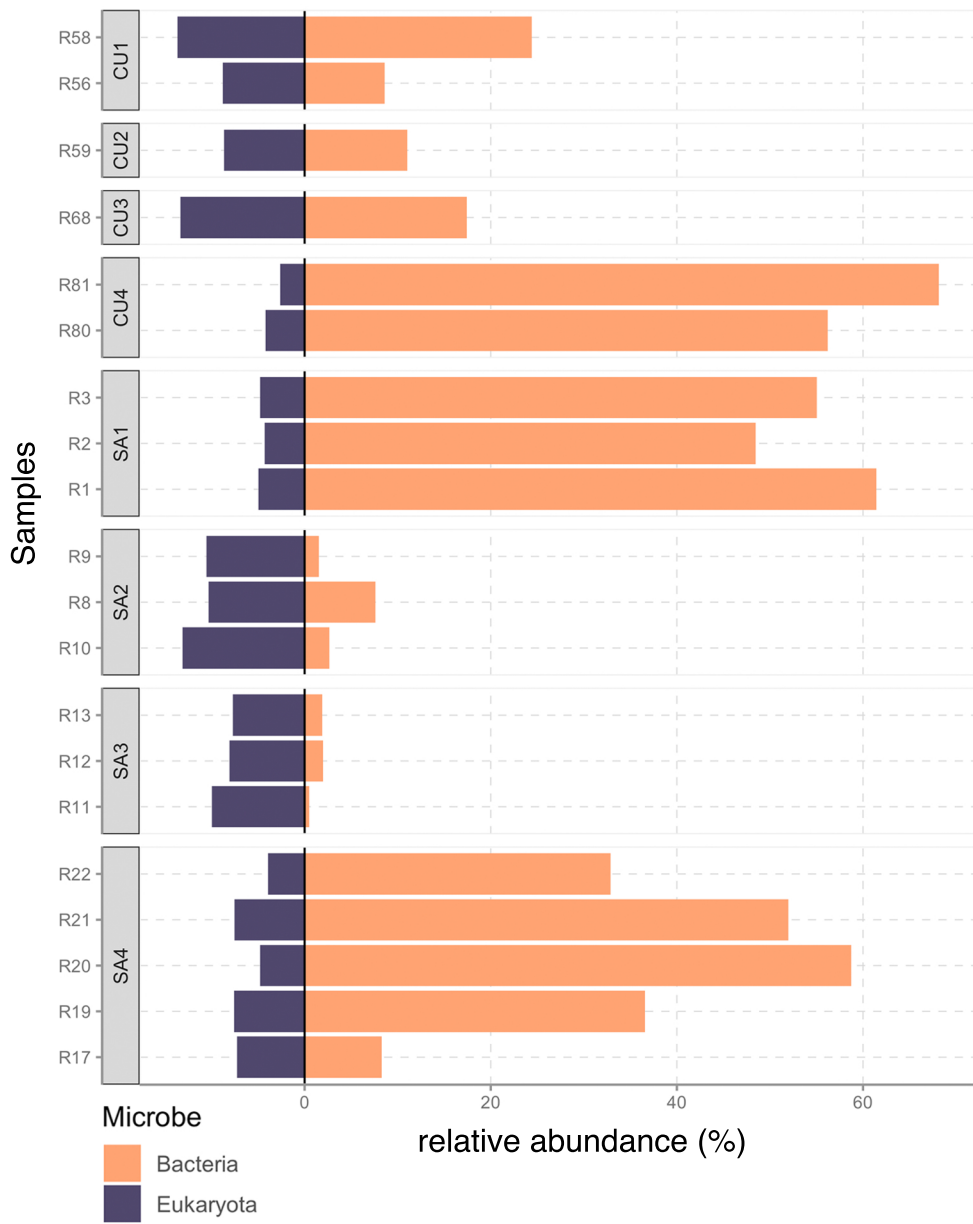

c

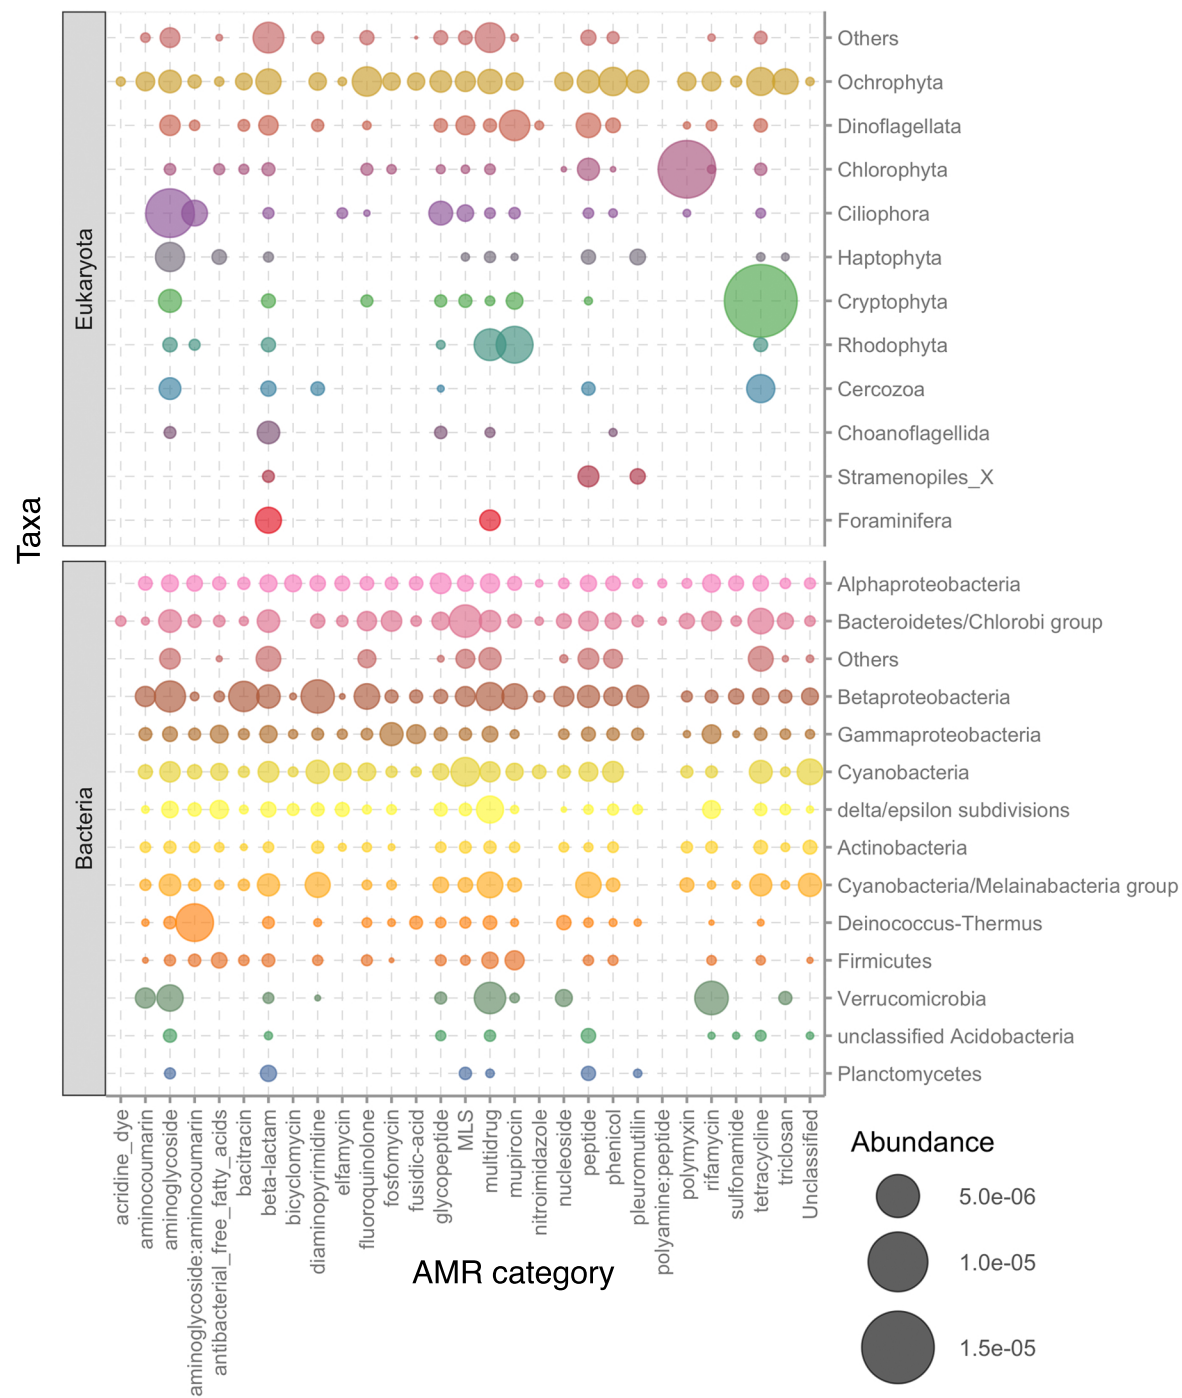

Figure 2

a

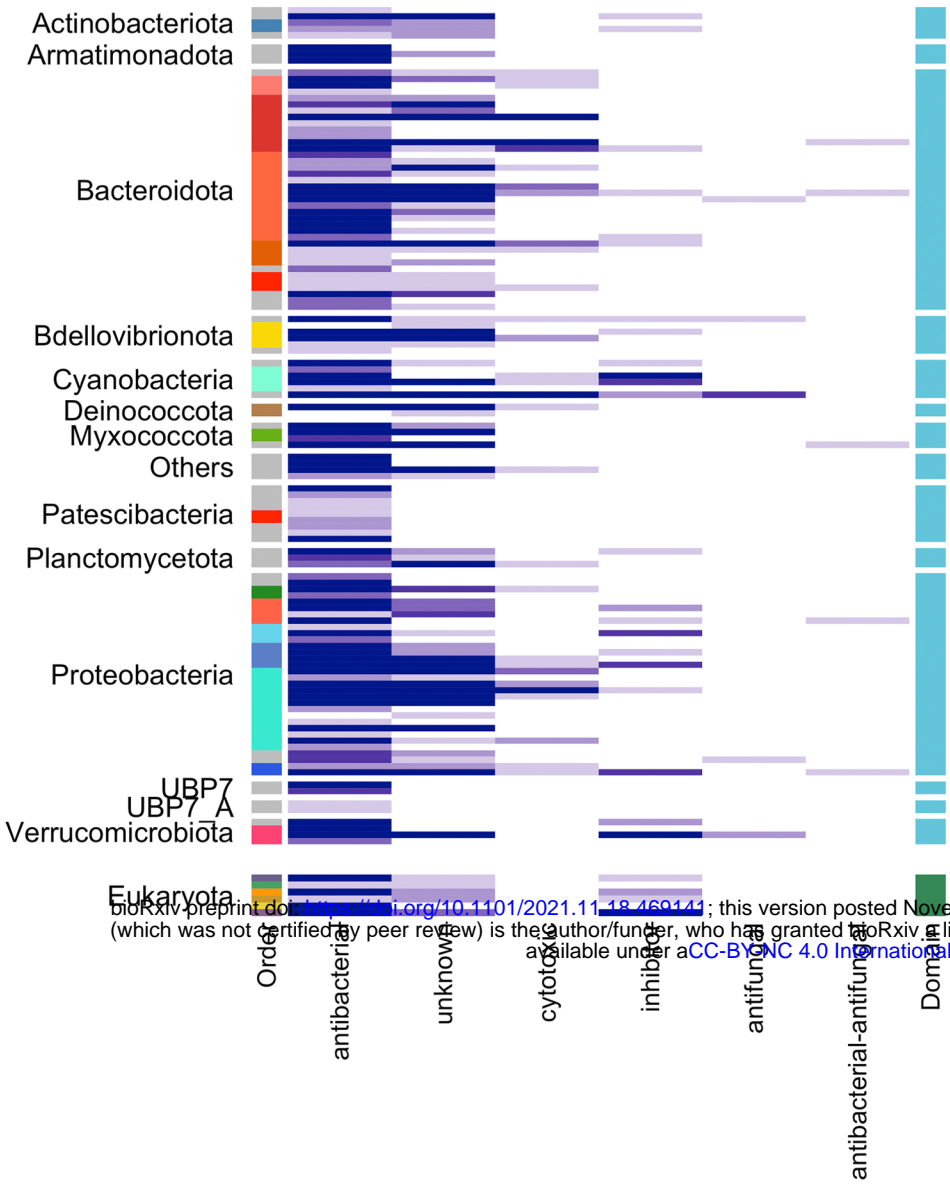

b

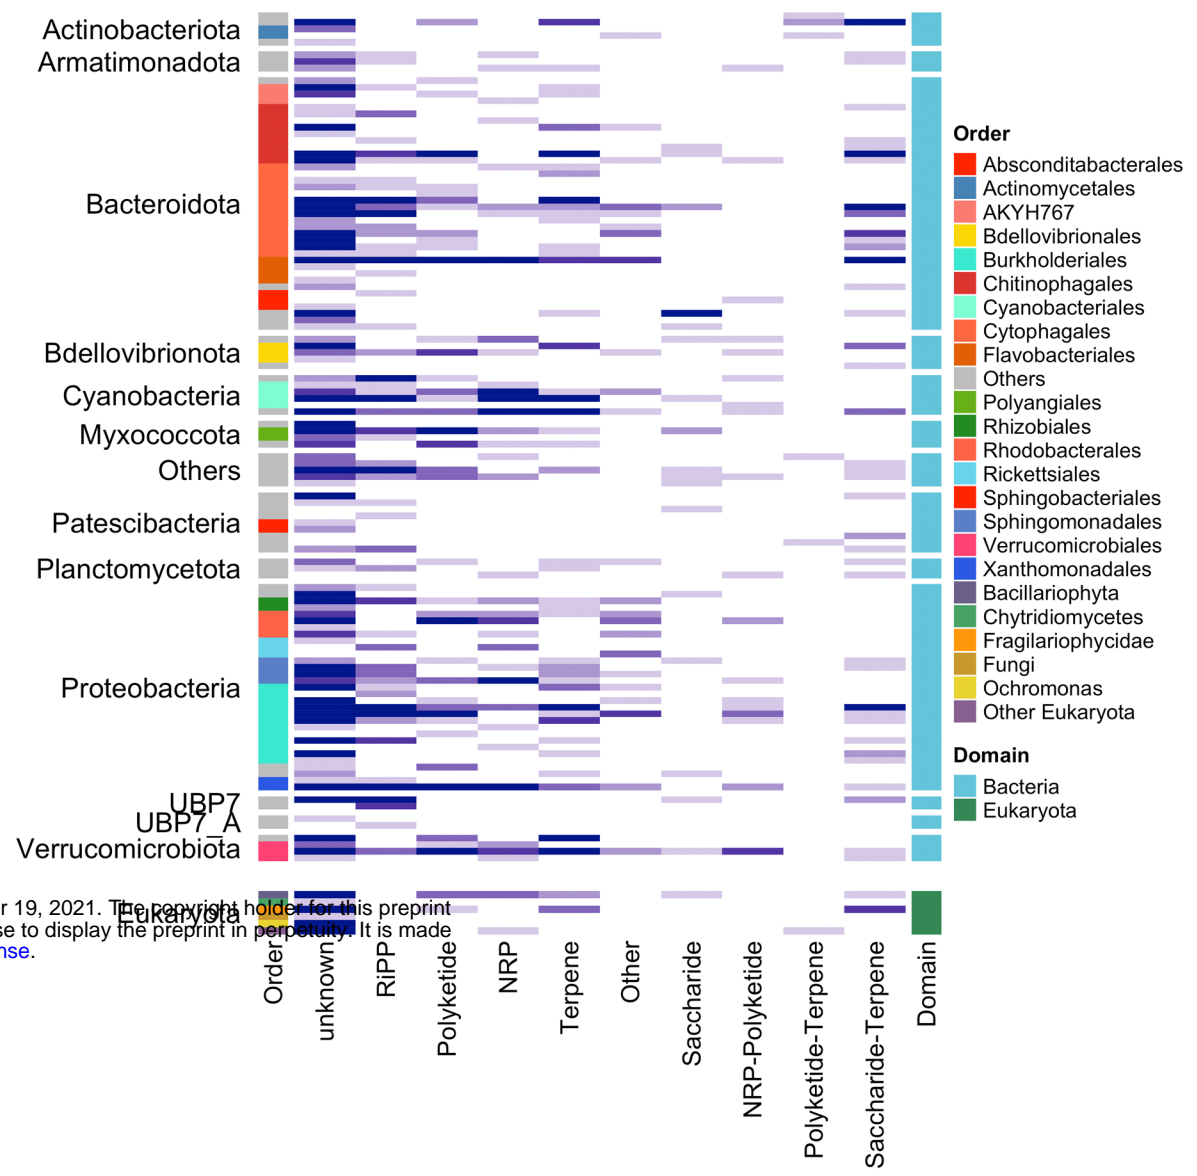

c

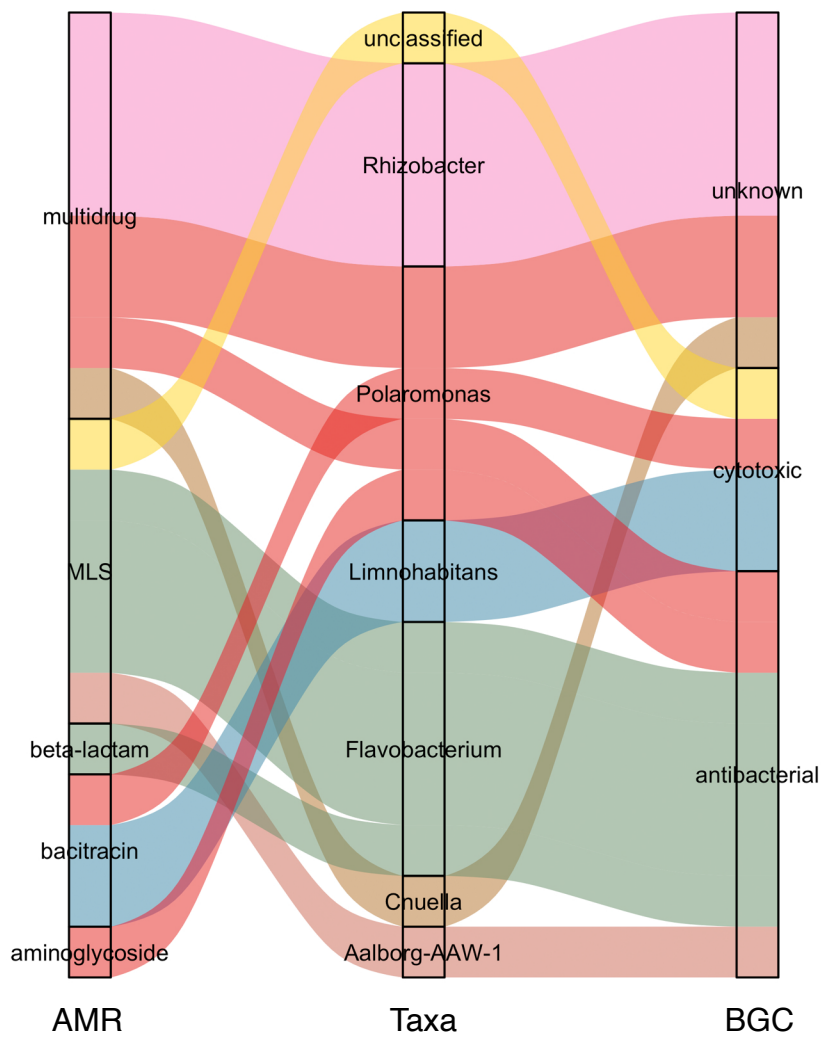

bioRxiv preprint doi: <https://doi.org/10.1101/2021.11.18.469144>; this version posted November 19, 2021. The copyright holder for this preprint (which was not certified by peer review) is the author/funder, who has granted bioRxiv a license to display the preprint in perpetuity. It is made available under aCC-BY-NC 4.0 International license.

# Supplementary Figure 1

a

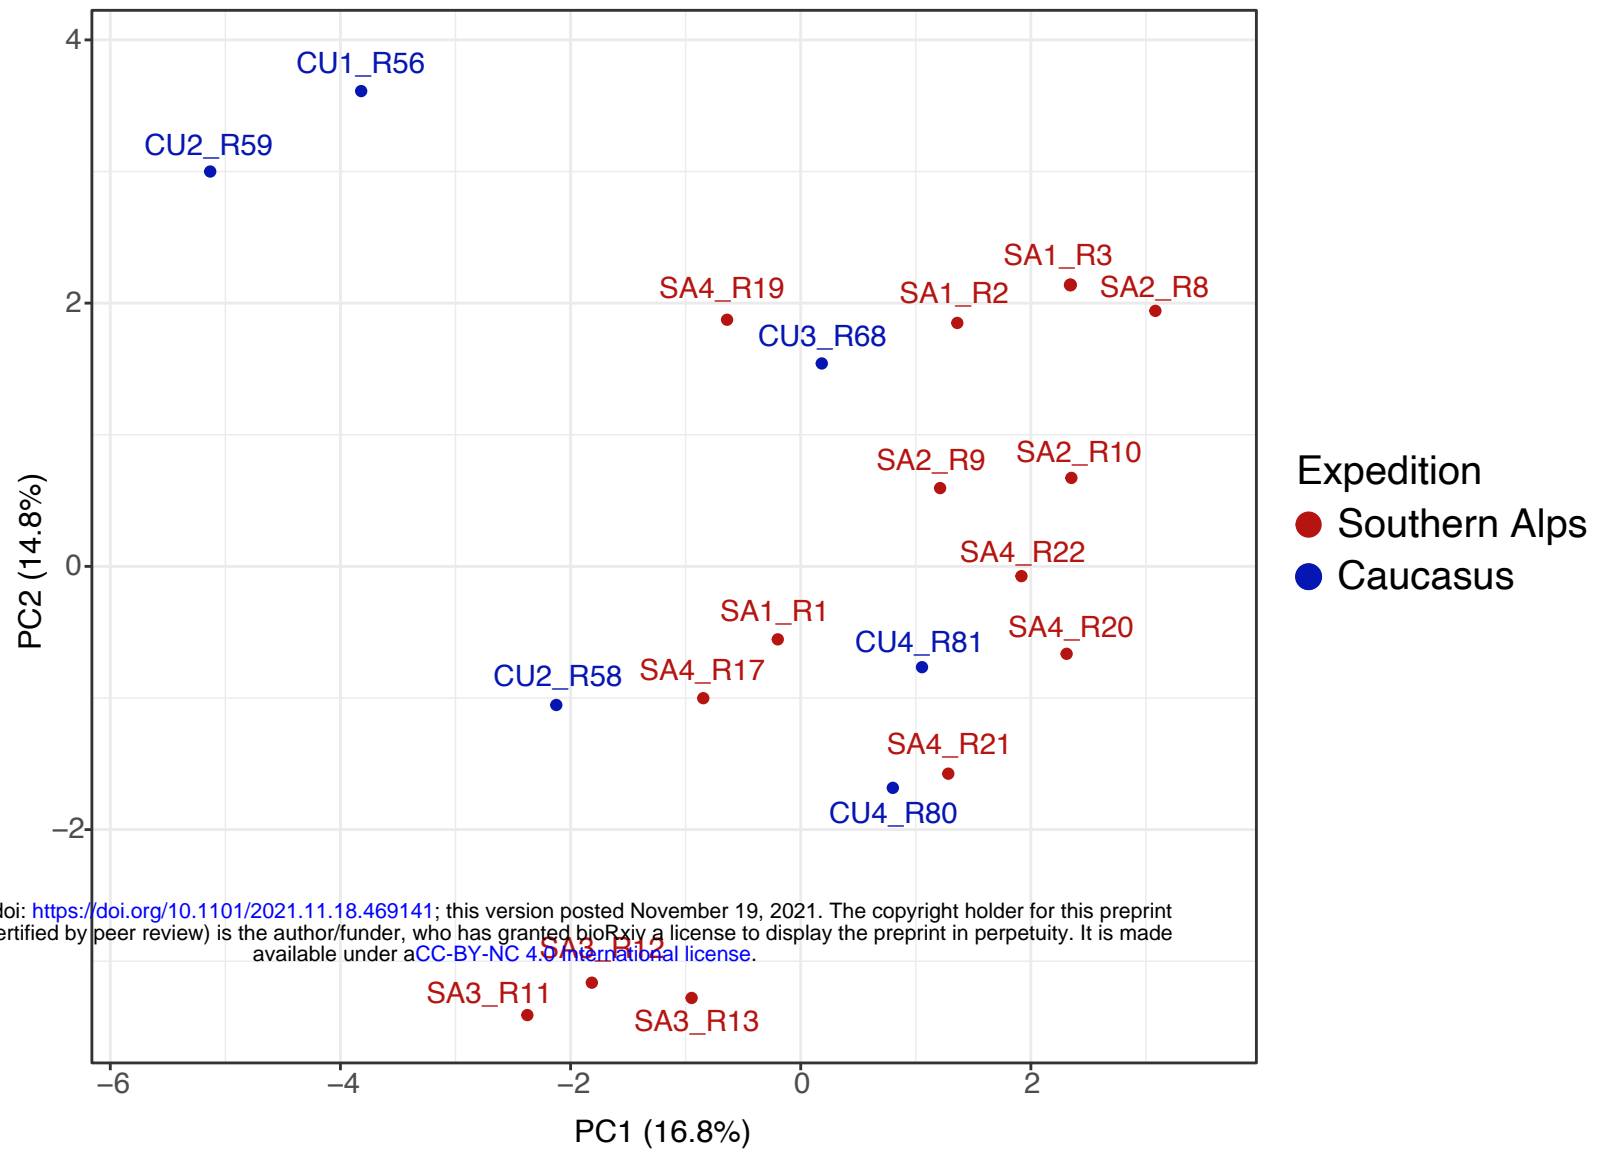

b

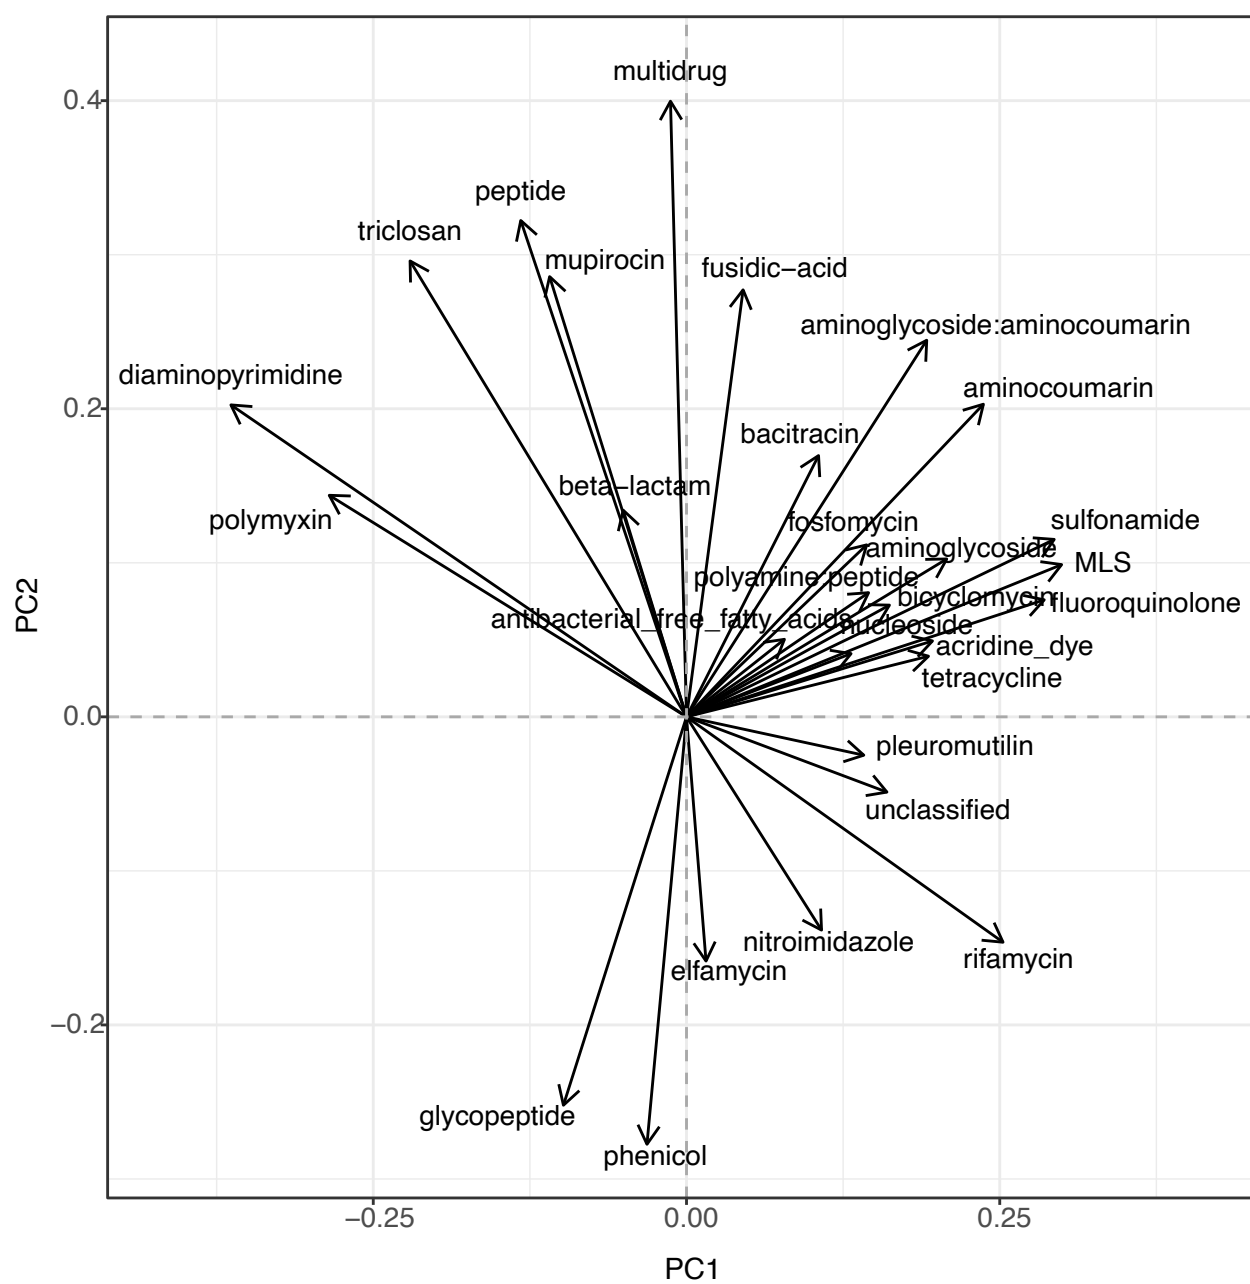



Supplementary Figure 2

a

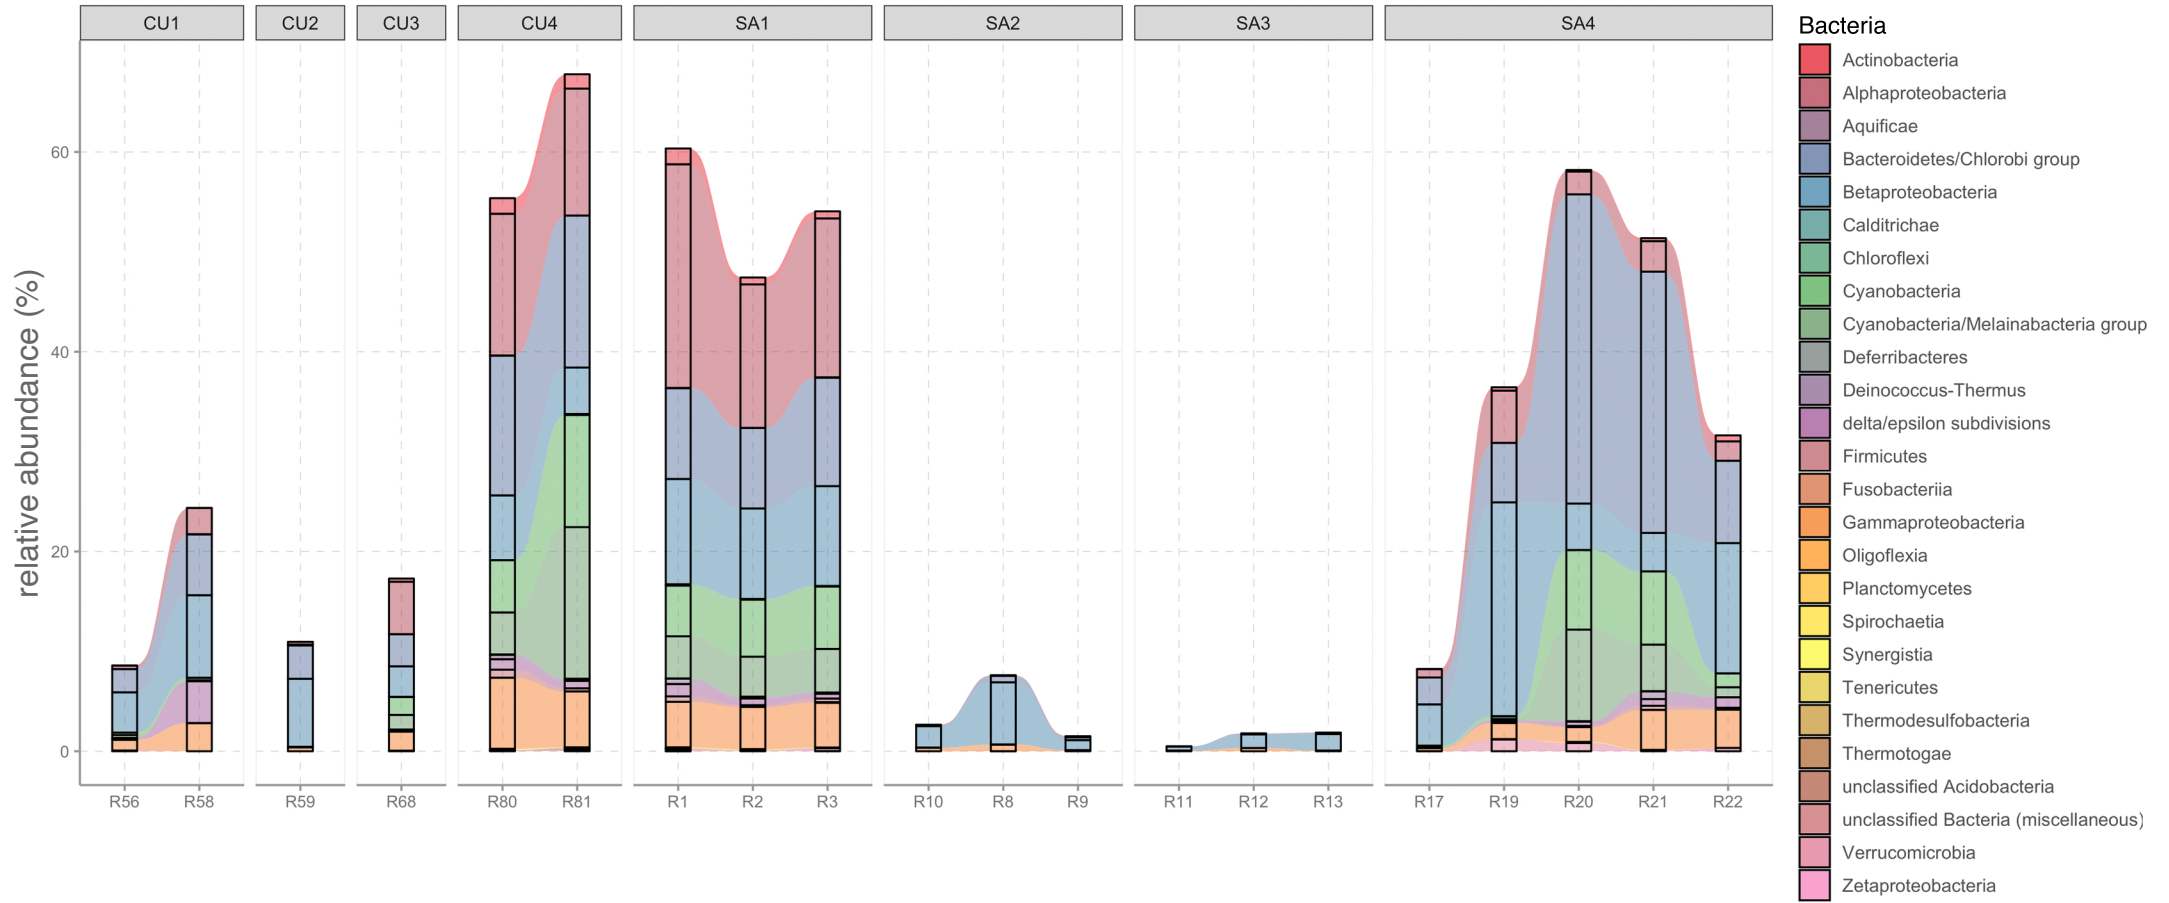

b

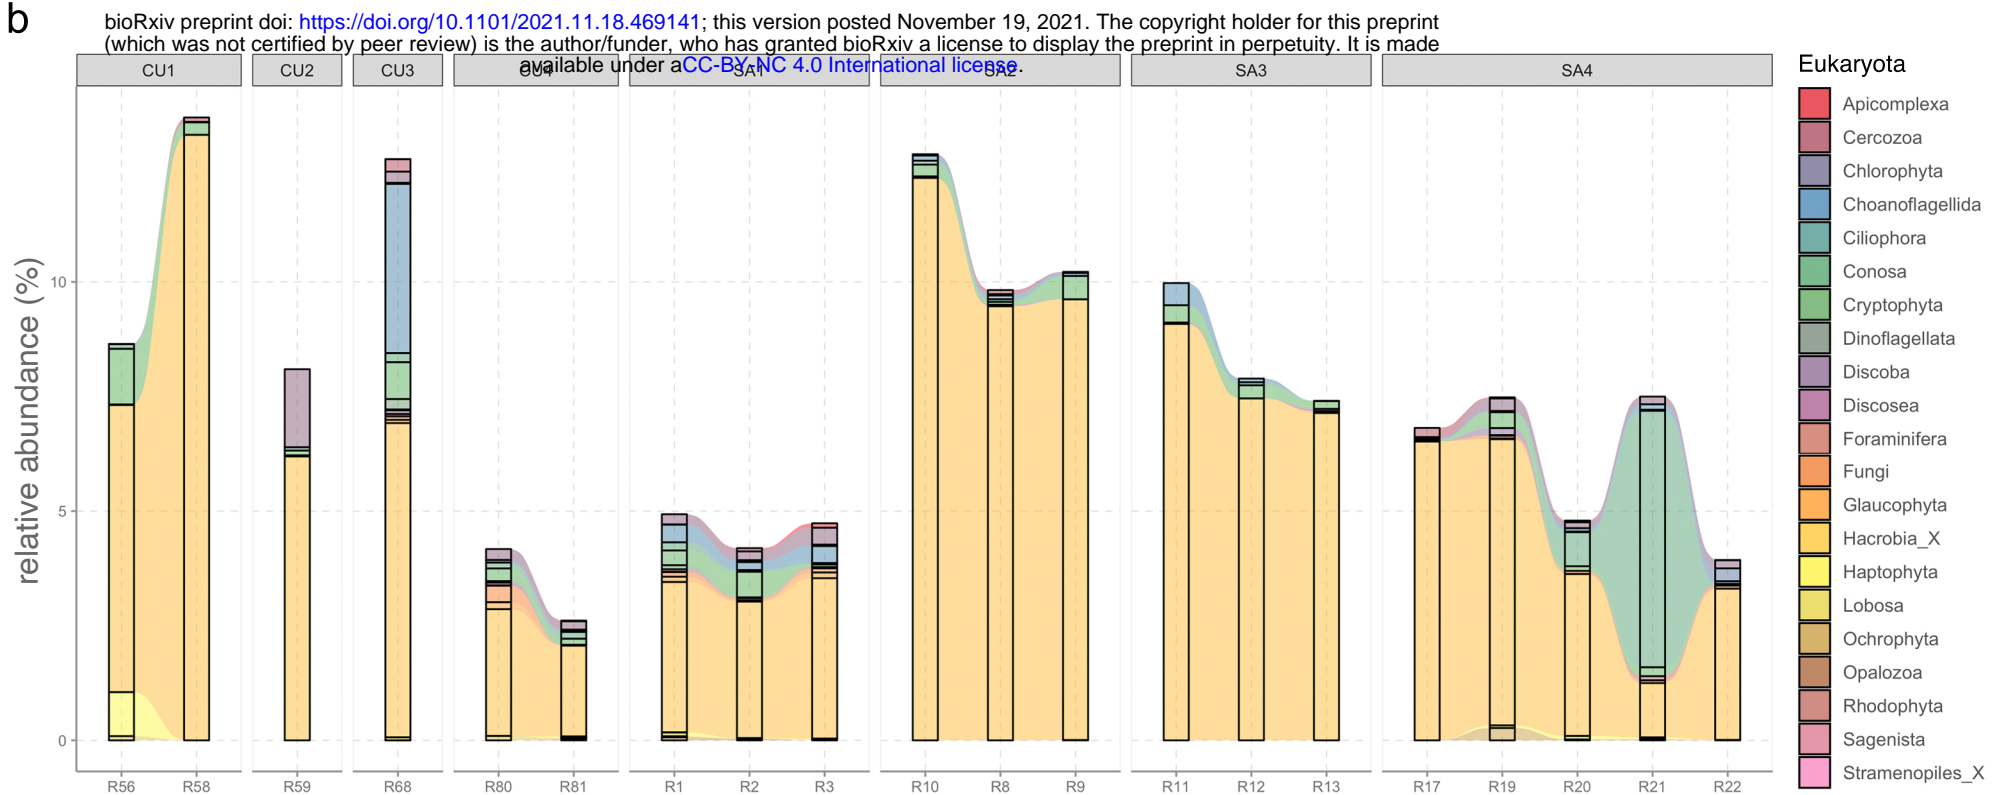

# Supplementary Figure 3

a

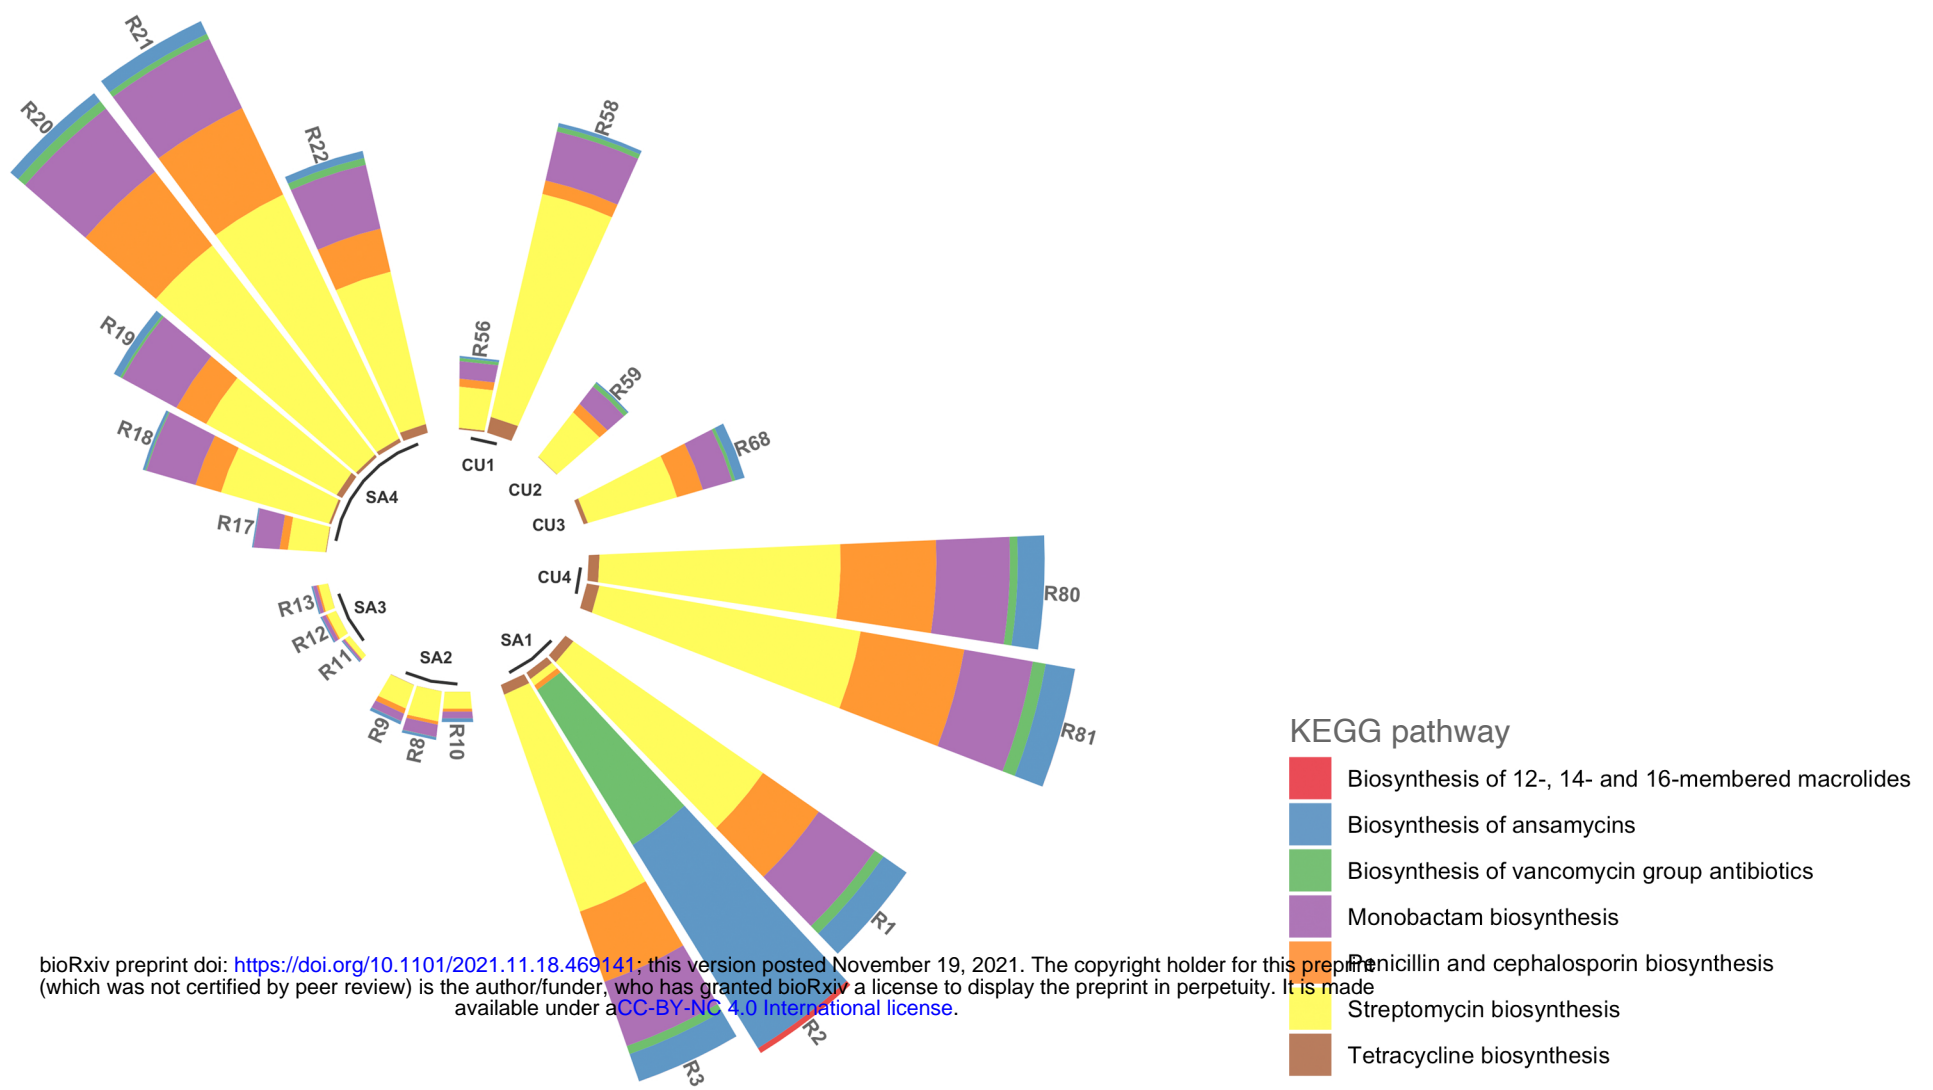

b

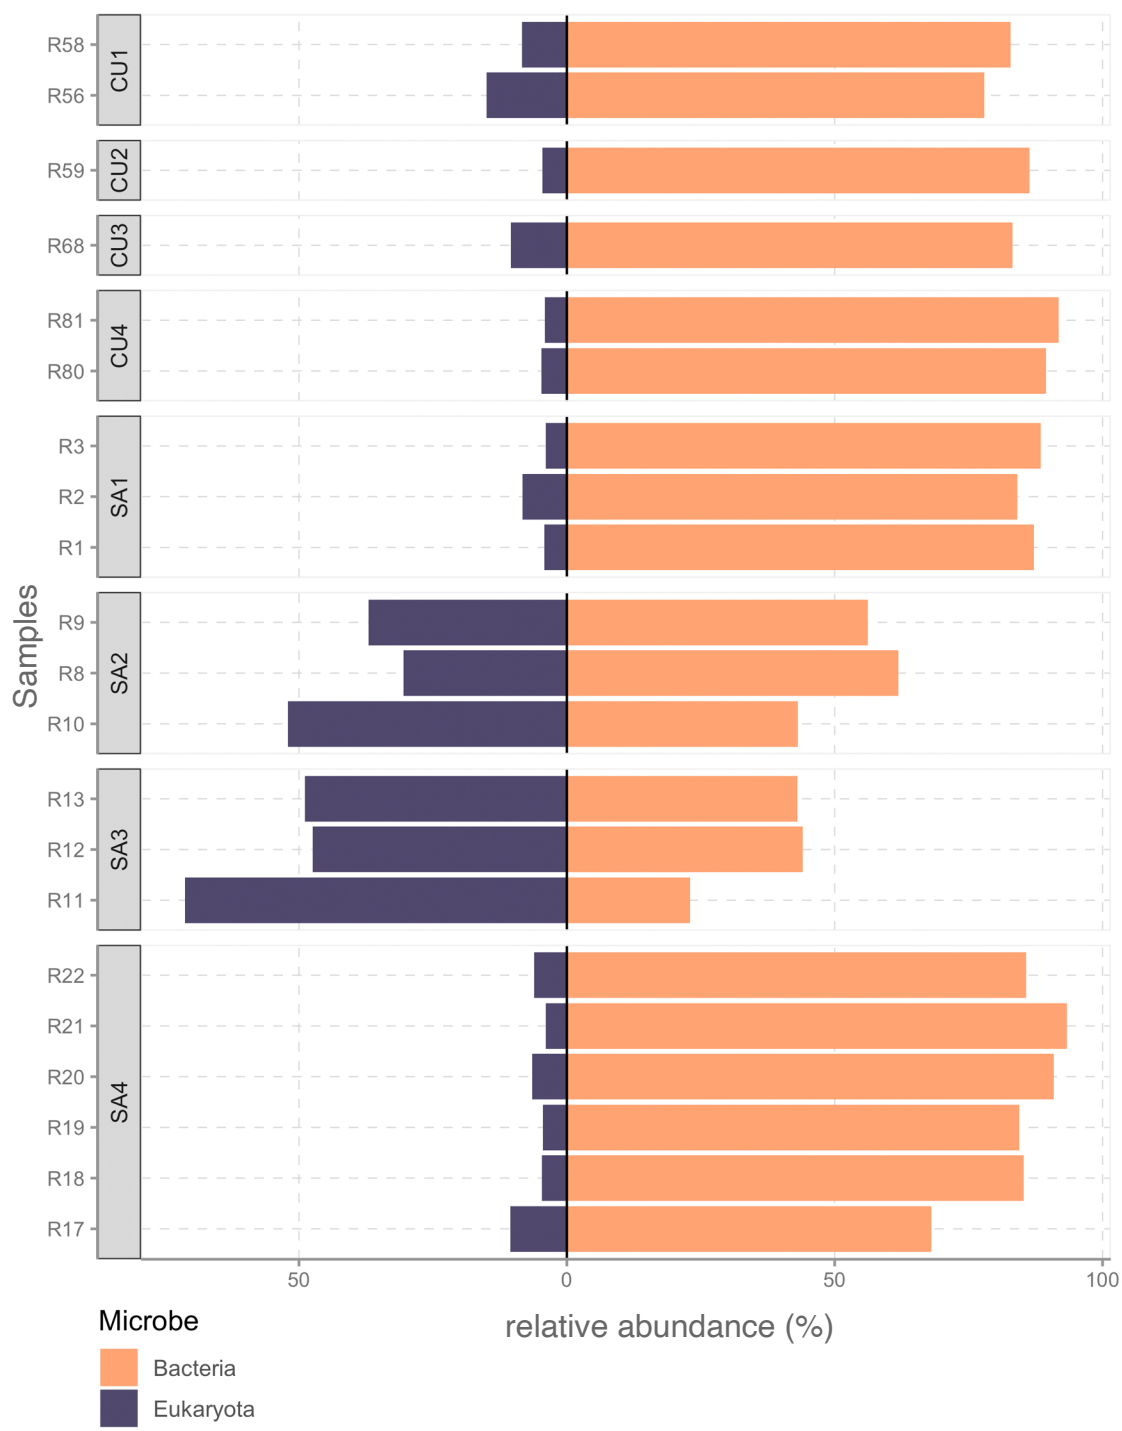

c

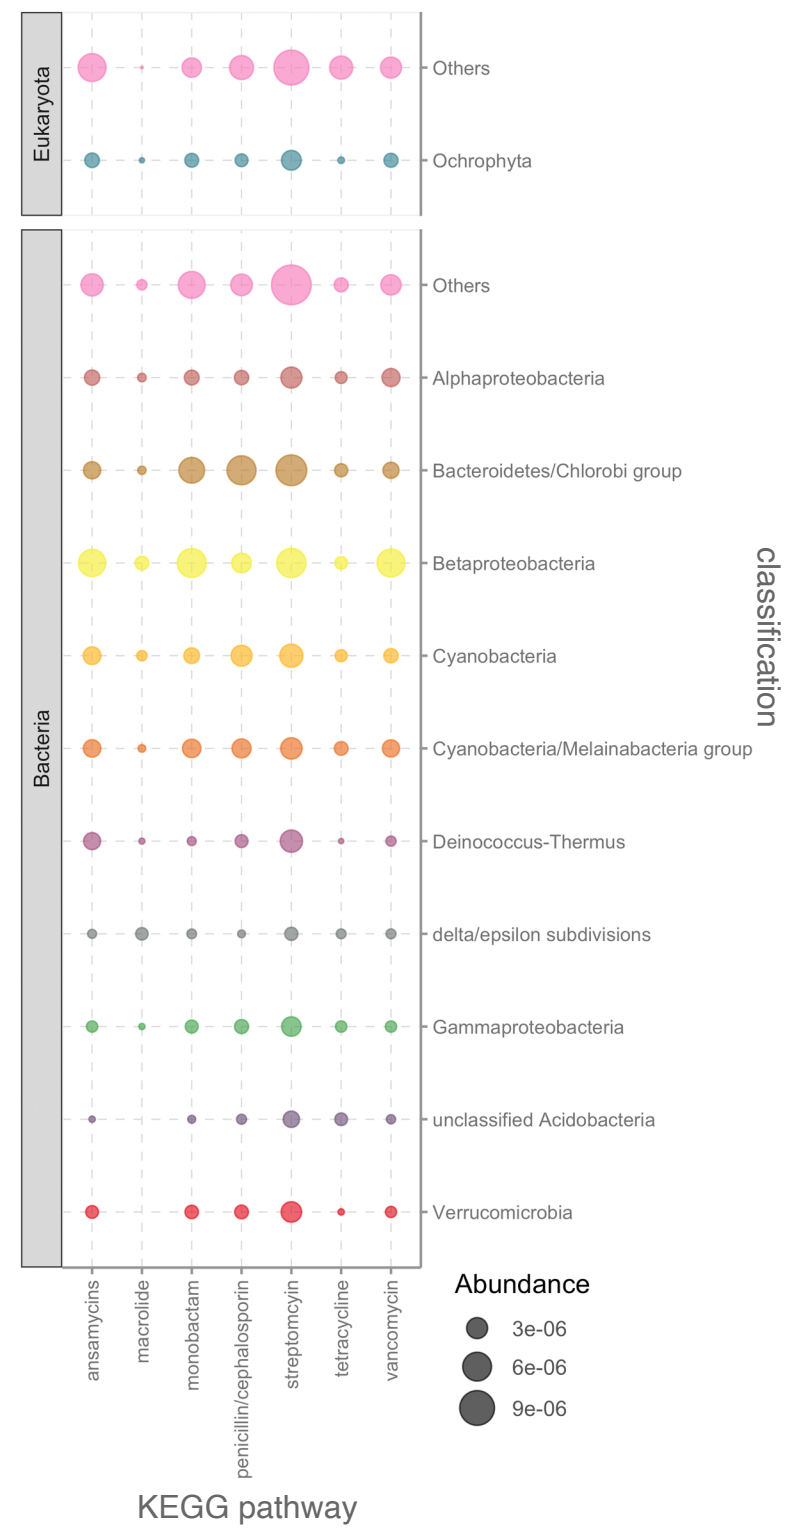

Source: https://www.biorxiv.org/content/10.1101/2021.11.18.469141v2.full.pdf
